# Supplementary material
Source: publisher site journal article supplement (https://dez.pensoft.net/article/4295/download/suppl/33/)
Supplement: Supplementary file 1

## Sheet: Tabelle1
current name	continent	country	province	location	coordinates	citation	titel (short version)
Asadeteva afghana U. Aspöck & H. Aspöck, 1981	ASI	Afghanistan	Parwan	Panjshirtal, 1800m, nordöst. Charikar	69°30', 35°20'	U. Aspöck & H. Aspöck 1981	Weitere Untersuchungen an Berothiden
Asadeteva afghana U. Aspöck & H. Aspöck, 1981	ASI	Afghanistan		25km N v. Barikot, 1800m, Nuristan		U. Aspöck & H. Aspöck 1981	Weitere Untersuchungen an Berothiden
Asadeteva sp.	ASI	Pakistan		Hacker Pattan 1050m 7.10.1988	35°08’N, 72°56’E	unpublished det. Aspöck
Asadeteva sp.	ASI	India		Himachal Pradesh, 1300m Parvati Tal, 4km NE von Bnutar, 24.10.90	32°00’N, 77°14’E	unpublished det. Aspöck
Asadeteva vartianorum U. Aspöck & H. Aspöck, 1981	ASI	Pakistan	Swat	Madyan, 1400m	71°90', 35°70'	U. Aspöck & H. Aspöck 1981	Weitere Untersuchungen an Berothiden
Austroberothella rieki U. Aspöck & H. Aspöck, 1985	AUS	Australia	Australian Capital Territory	Canberra		U. Aspöck & H. Aspöck 1985	Die Berothiden Australiens (und Neuseelands) II
Austroberothella rieki U. Aspöck & H. Aspöck, 1985	AUS	Australia	Australian Capital Territory	Cotter Dam, 500m		U. Aspöck & H. Aspöck 1988	Die Berothiden Australiens V
Berlekrumyia africanella U. Aspöck & H. Aspöck, 1988	AFR	Mozambique		Serra Rotanda E. of Chimanimani Mts		U. Aspöck & H. Aspöck 1988	Berlekrumyia africanella und Podallea manselli
Berlekrumyia africanella U. Aspöck & H. Aspöck, 1988	AFR	Malawi		Mkuwadzi forest Nkata Bay		U. Aspöck & H. Aspöck 1988	Berlekrumyia africanella und Podallea manselli
Berlekrumyia sp.	AFR	Tanzania		northern apex of Rufiji delta	7°46'S, 39°19'E	Hynd 1992	On some Neuroptera recently collected in Tanzania
Berotha baminana Yang & Liu, 1999	ASI	China	Fujian	Dehua, Shuikou	25°31'N, 118°27'E	Yang & Liu 1999	Berothidae
Berotha borneensis Navás, 1912	ASI	Malaysia	Borneo	Baram		Navás 1929	Monografía de la Familia de los Berótidos
Berotha borneensis Navás, 1912	ASI	Malaysia	Borneo	Bettotan	5°50'N, 118°07'E	Banks 1931	Some Neuropteroid Insects from the Malay Peninsula
Berotha borneensis Navás, 1912	ASI	Malaysia	Borneo	Kedah Peak	5°46'N, 100°26'E	Banks 1931	Some Neuropteroid Insects from the Malay Peninsula
Berotha chouioi Yang & Liu, 2002	ASI	China	Hainan	Noda	18°26'N, 109°41'E	Yang & Liu 2002	Neuroptera: Berothidae
Berotha indica (Brauer, 1865)	ASI	Sri Lanka		Peradeniya		U. Aspöck 1983	Das Genus Berotha
Berotha indica (Brauer, 1865)	ASI	Sri Lanka				Krüger 1922	Berothidae. Beiträge zu einer Monographie
Berotha indica (Brauer, 1865)	ASI	Taiwan				Krüger 1922	Berothidae. Beiträge zu einer Monographie
Berotha indica (Brauer, 1865)	ASI	Sri Lanka				Navás 1929	Monografía de la Familia de los Berótidos
Berotha indica (Brauer, 1865)	ASI	Taiwan		Taihorin	23°35'N, 120°28'E	Navás 1929	Monografía de la Familia de los Berótidos
Berotha indica (Brauer, 1865)	ASI	India	Maharashtra	Khandala	18°45'N, 73°22'E	Navás 1931	Insectos de la India, 4a Serie
Berotha insolita Walker, 1860	ASI	India		Meghalaya, Darugiri, Garo Hills, 450m		U. Aspöck 1983	Das Genus Berotha
Berotha insolita Walker, 1860	ASI	Burma		Hindostán, Misty Hollow, W side Dawna Hills, 2200ft	16°30'N, 98°18'E	Navás 1929	Monografía de la Familia de los Berótidos
Berotha insolita Walker, 1860	ASI	Nepal		E Nepal, Chainpur, 1300m	27°12’N, 87°20’E	unpublished det. Aspöck
Berotha insolita Walker, 1860	ASI	Thailand		Khon Kaen Khon Kaen University		unpublished det. Aspöck
Berotha insolita Walker, 1860	ASI	Thailand		Doi Sutep Bächlein neben Montatan		unpublished det. Aspöck
Berotha insolita Walker, 1860	ASI	Thailand		Chiangmai, Universität, Ang Kaew, 400m	18°48’N, 98°57’E	unpublished det. Aspöck
Berotha insolita Walker, 1860	ASI	India		Lucknow (=Lakhnau)		unpublished det. Aspöck
Berotha insolita Walker, 1860	ASI	India		Ch Nagpur		unpublished det. Aspöck
Berotha insulana U. Aspöck & H. Aspöck, 1981	ASI	Indonesia	Dammerman Doerian Riouw-Archipel [=Kepulauan Riau]			U. Aspöck & H. Aspöck 1981	Weitere Untersuchungen an Berothiden
Berotha insulana U. Aspöck & H. Aspöck, 1981	ASI	Indonesia	Sarawak	R. Kapah trib., of R. Tinjar.		unpublished det. Aspöck
Berotha piepersii van der Weele, 1904	ASI	Indonesia	Java	Rembang		U. Aspöck 1983	Das Genus Berotha
Berotha piepersii van der Weele, 1904	ASI	Singapore		Singapore		U. Aspöck 1983	Das Genus Berotha
Berotha piepersii van der Weele, 1904	ASI	Indonesia	Java	Rembang		Navás 1929	Monografía de la Familia de los Berótidos
Berotha piepersii van der Weele, 1904	ASI	Thailand		Doi Suthep Monthathan W.F.		unpublished det. Aspöck
Berotha piepersii van der Weele, 1904	ASI	Malaysia		W. Pahang, Genting Tea Estate 2000 ft		unpublished det. Aspöck
Berotha piepersii van der Weele, 1904	ASI	Malaysia		H.E. Durham, Selangor		unpublished det. Aspöck
Berotha piepersii van der Weele, 1904	ASI	Malaysia		Kuala Lumpur		unpublished det. Aspöck
Berotha piepersii van der Weele, 1904	ASI	Malaysia		Gombak		unpublished det. Aspöck
Berotha piepersii van der Weele, 1904	ASI	Malaysia		Selangor Kuala Lumpur		unpublished det. Aspöck
Berotha piepersii van der Weele, 1904	ASI	Malaysia	Borneo	Kudat	6°50'N, 117°18'E	Banks 1931	Some Neuropteroid Insects from the Malay Peninsula
Berotha piepersii van der Weele, 1904	ASI	Malaysia	Borneo	Kedah, Catchment Area near Jitra	6°15'N, 100°25'E	Banks 1931	Some Neuropteroid Insects from the Malay Peninsula
Berotha sp.	ASI	Philippines		Mindanao, Bokidnou, Musuan, Mt. Musuan	7°38'N, 125°02'E	unpublished det. Aspöck
Berotha spetana U. Aspöck, Liu & H. Aspöck, 2013	ASI	Taiwan	Nantou	Hueisun	24°05'N, 121°02'E	U. Aspöck, Liu & H. Aspöck 2013	The Berothidae of Taiwan
Berotha spetana U. Aspöck, Liu & H. Aspöck, 2013	ASI	Taiwan	Kaohsiung	Kosempo	23°04'N, 120°34'E	U. Aspöck, Liu & H. Aspöck 2013	The Berothidae of Taiwan
Berotha spetana U. Aspöck, Liu & H. Aspöck, 2013	ASI	Taiwan		Formosa	23°08'N, 120°15'E	U. Aspöck, Liu & H. Aspöck 2013	The Berothidae of Taiwan
Berotha spetana U. Aspöck, Liu & H. Aspöck, 2013	ASI	Taiwan		Rengeti	23°35'N, 120°53'E	U. Aspöck, Liu & H. Aspöck 2013	The Berothidae of Taiwan
Berotha taiwanica U. Aspöck, Liu & H. Aspöck, 2013	ASI	Taiwan	Chiayi	Taihorin	23°35'N, 120°28'E	U. Aspöck, Liu & H. Aspöck 2013	The Berothidae of Taiwan
Berotha taiwanica U. Aspöck, Liu & H. Aspöck, 2013	ASI	Taiwan	Kaohsiung	Hsiaolin	23°06'N, 120°37'E	U. Aspöck, Liu & H. Aspöck 2013	The Berothidae of Taiwan
Berotha zhejiangana Yang & Liu, 1995	ASI	China	Zhejiang	Mt. Baishanzu	27°46'N, 119°12'E	Yang et al 1995	Insects of Baishanzu Mountain
Berotha zhejiangana Yang & Liu, 1995	ASI	China	Zhejiang	Mt. Gutian	29°14'N, 118°06'E	Yang et al 1995	Insects of Baishanzu Mountain
Berothimerobius reticulatus Monserrat & Deretsky, 1999	SAM	Chile	Coquimbo	Cuesta de Buenos Aires		Monserrat & Deretsky 1999	New Faunistical, Taxonomic and Systematic Data
Berothimerobius reticulatus Monserrat & Deretsky, 1999	SAM	Chile	IV Región	Coquimbo, Elqui, Cuesta de Buenos Aires, Caleta Los Hornos, 40m	71°18'W, 29°36'S	Monserrat 2006	Nuevos datos sobre algunas especies...
Berothimerobius reticulatus Monserrat & Deretsky, 1999	SAM	Chile		Quebrada Honda, 60m	71°12'W, 29°29'S	Monserrat 2006	Nuevos datos sobre algunas especies...
Berothimerobius reticulatus Monserrat & Deretsky, 1999	SAM	Chile	La Serena	Cuesta Porotitos, 120m	71°18'W, 29°49'S	Monserrat 2006	Nuevos datos sobre algunas especies...
Berothimerobius reticulatus Monserrat & Deretsky, 1999	SAM	Chile		Punta Teatinos, 140m	71°18'W, 29°50'S	Monserrat 2006	Nuevos datos sobre algunas especies...
Cyrenoberotha penai MacLeod & Adams, 1968	SAM	Chile	Coquimbana	North of Huasco River, Atacama		MacLeod & Adams 1967	A review of the taxonomy and morphology of the Berothidae
Cyrenoberotha penai MacLeod & Adams, 1968	SAM	Chile		Quebrada Algodon, near Carrizal Bajo		MacLeod & Adams 1967	A review of the taxonomy and morphology of the Berothidae
Cyrenoberotha penai MacLeod & Adams, 1968	SAM	Chile		Coquimbo, Tofo		MacLeod & Adams 1967	A review of the taxonomy and morphology of the Berothidae
Isoscelipteron borneole U. Aspöck & H. Aspöck, 1991	ASI	Malaysia	Borneo	Limbang		U. Aspöck & H. Aspöck 1991	Zur Kenntnis des Genus Isoscelipteron
Isoscelipteron dictyophilum Yang & Liu, 1995	ASI	China	Zhejiang	Mt. Gutian	29°14'N, 118°06'E	Yang et al 1995	Insects of Baishanzu Mountain
Isoscelipteron dictyophilum Yang & Liu, 1995	ASI	China	Zhejiang	Mt. Baishanzu	27°46'N, 119°12'E	Yang et al 1995	Insects of Baishanzu Mountain
Isoscelipteron dictyophilum Yang & Liu, 1995	ASI	China	Zhejiang	Tianmushan National Nature Reserve	30°22'N, 119°26'E	Yang 2001	Insects of Tianmushan National Nature Reserve
Isoscelipteron eucallum Yang & Liu, 1999	ASI	China	Jiangsu	Sangang	29°40'N, 118°41'E	Yang & Liu 1999	Berothidae
Isoscelipteron formosense (Krüger, 1922)	ASI	Taiwan		Kosempo		U. Aspöck & H. Aspöck 1980	Das Genus Isoscelipteron
Isoscelipteron formosense (Krüger, 1922)	ASI	Taiwan		Sokutsu		Krüger 1922	Berothidae. Beiträge zu einer Monographie
Isoscelipteron formosense (Krüger, 1922)	ASI	Taiwan		Kosempo		Krüger 1922	Berothidae. Beiträge zu einer Monographie
Isoscelipteron formosense (Krüger, 1922)	ASI	Taiwan	Kaohsiung	Kosempo	23°04'N, 120°34'E	U. Aspöck, Liu & H. Aspöck 2013	The Berothidae of Taiwan
Isoscelipteron formosense (Krüger, 1922)	ASI	Taiwan	Kaohsiung	Hsiaolin	23°06'N, 120°37'E	U. Aspöck, Liu & H. Aspöck 2013	The Berothidae of Taiwan
Isoscelipteron formosense (Krüger, 1922)	ASI	Taiwan	Nantou	Hueisun Exp. Forest 24.-29. X. 1998, 650m	24°05'N, 121°02'E	U. Aspöck, Liu & H. Aspöck 2013	The Berothidae of Taiwan
Isoscelipteron fulvum Costa, 1863	EUR	Greece		Lesbos, über Skoutaros, 220m	39.18°N, 26.10°E	U. Aspöck & H. Aspöck 1991	Zur Kenntnis des Genus Isoscelipteron
Isoscelipteron fulvum Costa, 1863	EUR	Greece		Lakonia 7km SW Monemvasia		U. Aspöck & H. Aspöck 1991	Zur Kenntnis des Genus Isoscelipteron
Isoscelipteron fulvum Costa, 1863	EUR	Turkey		o. Aksehir		U. Aspöck & H. Aspöck 1991	Zur Kenntnis des Genus Isoscelipteron
Isoscelipteron fulvum Costa, 1863	EUR	Turkey		620 Taurus 48	36°23'N, 33°14'E	U. Aspöck & H. Aspöck 1991	Zur Kenntnis des Genus Isoscelipteron
Isoscelipteron fulvum Costa, 1863	ASI	Israel		1100m, Mt. Maron		U. Aspöck & H. Aspöck 1991	Zur Kenntnis des Genus Isoscelipteron
Isoscelipteron fulvum Costa, 1863	EUR	Turkey		Brussa		Krüger 1922	Berothidae. Beiträge zu einer Monographie
Isoscelipteron fulvum Costa, 1863	EUR	Italia	Calabrien	Staiti		Navás 1929	Monografía de la Familia de los Berótidos
Isoscelipteron fulvum Costa, 1863	EUR	Greece				Navás 1929	Monografía de la Familia de los Berótidos
Isoscelipteron fulvum Costa, 1863	EUR	Spain				Navás 1929	Monografía de la Familia de los Berótidos
Isoscelipteron fulvum Costa, 1863	ASI	Armenia		Meghri		Zakharenko 1988	Neuroptera of the Fauna of the USSR
Isoscelipteron fulvum Costa, 1863	ASI	Armenia		Aras (Fluss), Njubadi? (Sjunik?)		Zakharenko 1988	Neuroptera of the Fauna of the USSR
Isoscelipteron fulvum Costa, 1863	EUR	Bulgaria				Popov 2005	Distribution of the families of Neuroptera with low species diversity in Bulgaria
Isoscelipteron fulvum Costa, 1863	EUR	Bulgaria				Popov 2005	Distribution of the families of Neuroptera with low species diversity in Bulgaria
Isoscelipteron fulvum Costa, 1863	EUR	Bulgaria				Popov 2005	Distribution of the families of Neuroptera with low species diversity in Bulgaria
Isoscelipteron fulvum Costa, 1863	EUR	Bulgaria				Popov 2005	Distribution of the families of Neuroptera with low species diversity in Bulgaria
Isoscelipteron fulvum Costa, 1863	EUR	Bulgaria				Popov 2005	Distribution of the families of Neuroptera with low species diversity in Bulgaria
Isoscelipteron fulvum Costa, 1863	EUR	Bulgaria				Popov 2005	Distribution of the families of Neuroptera with low species diversity in Bulgaria
Isoscelipteron fulvum Costa, 1863	EUR	Bulgaria				Popov 2005	Distribution of the families of Neuroptera with low species diversity in Bulgaria
Isoscelipteron fulvum Costa, 1863	EUR	Bulgaria				Popov 2005	Distribution of the families of Neuroptera with low species diversity in Bulgaria
Isoscelipteron fulvum Costa, 1863	EUR	Bulgaria				Popov 2005	Distribution of the families of Neuroptera with low species diversity in Bulgaria
Isoscelipteron fulvum Costa, 1863	EUR	Bulgaria				Popov 2005	Distribution of the families of Neuroptera with low species diversity in Bulgaria
Isoscelipteron fulvum Costa, 1863	EUR	Bulgaria				Popov 2005	Distribution of the families of Neuroptera with low species diversity in Bulgaria
Isoscelipteron fulvum Costa, 1863	EUR	Bulgaria				Popov 2005	Distribution of the families of Neuroptera with low species diversity in Bulgaria
Isoscelipteron fulvum Costa, 1863	EUR	Bulgaria				Popov 2005	Distribution of the families of Neuroptera with low species diversity in Bulgaria
Isoscelipteron fulvum Costa, 1863	EUR	Bulgaria				Popov 2005	Distribution of the families of Neuroptera with low species diversity in Bulgaria
Isoscelipteron fulvum Costa, 1863	EUR	Albania		Berat		Devetak	Email vom 4.8.2013 (auch: nordöstl. Vorkommen former YU Macedonien - nicht erfasst)
Isoscelipteron fulvum Costa, 1863	EUR	Turkey	Mardin	Kahramanmaraş, Sarıkaya	37°36'N, 36°57'E	Sengorca 1978	Berotha fulva
Isoscelipteron fulvum Costa, 1863	EUR	Romania		Dobrogea, Canaraua Fetii (Oltina)	44°08'N, 27°36'E	Kis 1992	Berotha fulva
Isoscelipteron fulvum Costa, 1863	EUR	Turkey	Elazig		38°57'N, 39°13'E	U. Aspöck 1987	What we know and what we don't know
Isoscelipteron fulvum Costa, 1863	EUR	Greece	Lasithi		35°04'N, 25°42'E	U. Aspöck 1987	What we know and what we don't know
Isoscelipteron fulvum Costa, 1863	EUR	Lebanon		Beirut	33°50'N, 35°32'E	U. Aspöck 1987	What we know and what we don't know
Isoscelipteron fulvum Costa, 1863	EUR	Turkey	Antalya	Side	36°46'N, 31°23'E	Monserrat & Hölzel 1987	Contribución al conocimiento de los neurópteros de Anatolia
Isoscelipteron fulvum Costa, 1863	EUR	Greece	Kreta			H. Aspöck, U. Aspöck & Hölzel 1980	Die Neuropteren Europas
Isoscelipteron fulvum Costa, 1863	EUR	Greece	Kreta			H. Aspöck, U. Aspöck & Hölzel 1980	Die Neuropteren Europas
Isoscelipteron fulvum Costa, 1863	EUR	Greece				H. Aspöck, U. Aspöck & Hölzel 1980	Die Neuropteren Europas
Isoscelipteron fulvum Costa, 1863	EUR	Greece				H. Aspöck, U. Aspöck & Hölzel 1980	Die Neuropteren Europas
Isoscelipteron fulvum Costa, 1863	EUR	Greece				H. Aspöck, U. Aspöck & Hölzel 1980	Die Neuropteren Europas
Isoscelipteron fulvum Costa, 1863	ASI	Iraq			33°30'N, 45°30'E	U. Aspöck 1987	What we know and what we don't know
Isoscelipteron fulvum Costa, 1863	EUR	Turkey				H. Aspöck, U. Aspöck & Hölzel 1980	Die Neuropteren Europas
Isoscelipteron fulvum Costa, 1863	EUR	Turkey				H. Aspöck, U. Aspöck & Hölzel 1980	Die Neuropteren Europas
Isoscelipteron fulvum Costa, 1863	EUR	Turkey				H. Aspöck, U. Aspöck & Hölzel 1980	Die Neuropteren Europas
Isoscelipteron fulvum Costa, 1863	EUR	Turkey				H. Aspöck, U. Aspöck & Hölzel 1980	Die Neuropteren Europas
Isoscelipteron fulvum Costa, 1863	EUR	Turkey				H. Aspöck, U. Aspöck & Hölzel 1980	Die Neuropteren Europas
Isoscelipteron fulvum Costa, 1863	EUR	Turkey				H. Aspöck, U. Aspöck & Hölzel 1980	Die Neuropteren Europas
Isoscelipteron fulvum Costa, 1863	EUR	Turkey				H. Aspöck, U. Aspöck & Hölzel 1980	Die Neuropteren Europas
Isoscelipteron fulvum Costa, 1863	ASI	Iran			30°47'N, 52°30'E	U. Aspöck 1987	What we know and what we don't know
Isoscelipteron glaserellum (U. Aspöck, H. Aspöck & Hölzel, 1979)	EUR	Spain	Malaga	14km westl. Algeciras, Straße Tarifa-Algeciras, 200m		U. Aspöck, H. Aspöck & Hölzel 1979	Berotha glaserella n.sp.
Isoscelipteron glaserellum (U. Aspöck, H. Aspöck & Hölzel, 1979)	EUR	Spain	Cadiz	10km östl. Tarifa, ca. 300m		U. Aspöck, H. Aspöck & Hölzel 1979	Berotha glaserella n.sp.
Isoscelipteron glaserellum (U. Aspöck, H. Aspöck & Hölzel, 1979)	AFR	Morocco		Moyen Atlas, El Ksiba, 1850m		U. Aspöck, H. Aspöck & Hölzel 1979	Berotha glaserella n.sp.
Isoscelipteron glaserellum (U. Aspöck, H. Aspöck & Hölzel, 1979)	EUR	Spain	Andalusien	Camino de Istan, ca. 400m		U. Aspöck & H. Aspöck 1991	Zur Kenntnis des Genus Isoscelipteron
Isoscelipteron glaserellum (U. Aspöck, H. Aspöck & Hölzel, 1979)	AFR	Morocco		Chechaouen Korkeichenwald, 500m		U. Aspöck & H. Aspöck 1991	Zur Kenntnis des Genus Isoscelipteron
Isoscelipteron glaserellum (U. Aspöck, H. Aspöck & Hölzel, 1979)	EUR	Spain	Granada	La Herradura		Monserrat 2006	Nuevos datos sobre algunas especies...
Isoscelipteron glaserellum (U. Aspöck, H. Aspöck & Hölzel, 1979)	EUR	Spain	Jaén	Sierra de Cazorla, Camino Agraecea		Monserrat 2006	Nuevos datos sobre algunas especies...
Isoscelipteron glaserellum (U. Aspöck, H. Aspöck & Hölzel, 1979)	EUR	Spain		Hoyos de Muños		Monserrat 2006	Nuevos datos sobre algunas especies...
Isoscelipteron glaserellum (U. Aspöck, H. Aspöck & Hölzel, 1979)	EUR	Spain		Jándula		Monserrat 2006	Nuevos datos sobre algunas especies...
Isoscelipteron glaserellum (U. Aspöck, H. Aspöck & Hölzel, 1979)	EUR	Spain		Lugarnuevo		Monserrat 2006	Nuevos datos sobre algunas especies...
Isoscelipteron glaserellum (U. Aspöck, H. Aspöck & Hölzel, 1979)	EUR	Spain		Madrid, Hoyo de Manzanares		Monserrat 2006	Nuevos datos sobre algunas especies...
Isoscelipteron glaserellum (U. Aspöck, H. Aspöck & Hölzel, 1979)	EUR	Spain	Tarragona	Tortosa		Monserrat 2006	Nuevos datos sobre algunas especies...
Isoscelipteron glaserellum (U. Aspöck, H. Aspöck & Hölzel, 1979)	EUR	France	Pyrénées-Orientales	Sainte-colombe-de-la-commanderie		Mazel 2004	Questions paléobiogéographiques...
Isoscelipteron glaserellum (U. Aspöck, H. Aspöck & Hölzel, 1979)	EUR	Spain				Monserrat & Triviño 2013	Atlas de los neuropteros de la Peninsula Iberida e Islas Baleares
Isoscelipteron glaserellum (U. Aspöck, H. Aspöck & Hölzel, 1979)	EUR	Spain				Monserrat & Triviño 2013	Atlas de los neuropteros de la Peninsula Iberida e Islas Baleares
Isoscelipteron glaserellum (U. Aspöck, H. Aspöck & Hölzel, 1979)	EUR	Spain				Monserrat & Triviño 2013	Atlas de los neuropteros de la Peninsula Iberida e Islas Baleares
Isoscelipteron glaserellum (U. Aspöck, H. Aspöck & Hölzel, 1979)	EUR	Spain				Monserrat & Triviño 2013	Atlas de los neuropteros de la Peninsula Iberida e Islas Baleares
Isoscelipteron glaserellum (U. Aspöck, H. Aspöck & Hölzel, 1979)	EUR	Spain				Monserrat & Triviño 2013	Atlas de los neuropteros de la Peninsula Iberida e Islas Baleares
Isoscelipteron glaserellum (U. Aspöck, H. Aspöck & Hölzel, 1979)	EUR	Spain				Monserrat & Triviño 2013	Atlas de los neuropteros de la Peninsula Iberida e Islas Baleares
Isoscelipteron glaserellum (U. Aspöck, H. Aspöck & Hölzel, 1979)	EUR	Spain				Monserrat & Triviño 2013	Atlas de los neuropteros de la Peninsula Iberida e Islas Baleares
Isoscelipteron glaserellum (U. Aspöck, H. Aspöck & Hölzel, 1979)	EUR	Spain				Monserrat & Triviño 2013	Atlas de los neuropteros de la Peninsula Iberida e Islas Baleares
Isoscelipteron glaserellum (U. Aspöck, H. Aspöck & Hölzel, 1979)	EUR	Spain				Monserrat & Triviño 2013	Atlas de los neuropteros de la Peninsula Iberida e Islas Baleares
Isoscelipteron glaserellum (U. Aspöck, H. Aspöck & Hölzel, 1979)	EUR	Spain				Monserrat & Triviño 2013	Atlas de los neuropteros de la Peninsula Iberida e Islas Baleares
Isoscelipteron glaserellum (U. Aspöck, H. Aspöck & Hölzel, 1979)	EUR	Spain				Monserrat & Triviño 2013	Atlas de los neuropteros de la Peninsula Iberida e Islas Baleares
Isoscelipteron glaserellum (U. Aspöck, H. Aspöck & Hölzel, 1979)	EUR	Spain				Monserrat & Triviño 2013	Atlas de los neuropteros de la Peninsula Iberida e Islas Baleares
Isoscelipteron glaserellum (U. Aspöck, H. Aspöck & Hölzel, 1979)	EUR	Spain	Extremadura	Cáceres	06°41'W, 39°25'N	Plant 2005	Isoscelipteron glaserellum in Spain
Isoscelipteron glaserellum (U. Aspöck, H. Aspöck & Hölzel, 1979)	EUR	Portugal	Viseu	Casal Jusao, Silgueiros	40°33'N, 7°57'W	Tillier et al 2010	Isoscelipteron glaserellum in Portugal
Isoscelipteron glaserellum (U. Aspöck, H. Aspöck & Hölzel, 1979)	EUR	Spain	Almeria	Adra, 556m	36°44'N, 3°08'W	Monserrat 2014	Los berótidos de la Península Ibérica
Isoscelipteron glaserellum (U. Aspöck, H. Aspöck & Hölzel, 1979)	EUR	Spain	Malaga	Coín, Alpujata, Arroyo del Corcho, 445m	36°39'N, 4°42'W	Monserrat 2014	Los berótidos de la Península Ibérica
Isoscelipteron glaserellum (U. Aspöck, H. Aspöck & Hölzel, 1979)	EUR	Spain	Zaragoza	Monteoscura, Perdiguera, 554m	41°42'N, 0°34'W	Monserrat 2014	Los berótidos de la Península Ibérica
Isoscelipteron glaserellum (U. Aspöck, H. Aspöck & Hölzel, 1979)	EUR	Spain		lt. Fig. 8 Verbreitungskarte nordöstl. Punkt		Monserrat 2014	Los berótidos de la Península Ibérica
Isoscelipteron leveri (Kimmins, 1951)	ASI	Solomon Islands	Insel Santa Isabel	Fatuma		U. Aspöck & H. Aspöck 1981	Weitere Untersuchungen an Berothiden
Isoscelipteron nicobaricum (Navás, 1912)	ASI	Nicobar Islands		Bingliam		Navás 1929	Monografía de la Familia de los Berótidos
Isoscelipteron nicobaricum (Navás, 1912)	ASI	Nicobar Islands				U. Aspöck & H. Aspöck 1981	Weitere Untersuchungen an Berothiden
Isoscelipteron nicobaricum (Navás, 1912)	ASI	Indonesia		Krakatau Islands		New & Sudarman 1988	Neuroptera of the Krakatau Islands, Indonesia
Isoscelipteron nicobaricum (Navás, 1912)	ASI	Malaysia		Langkawi Islands, West Coast	6°23'N, 99°40'E	Banks 1931	Some Neuropteroid Insects from the Malay Peninsula
Isoscelipteron nicobaricum (Navás, 1912)	ASI	Malaysia	Selangor	Kuala Lumpur	3°00'N, 101°37'E	Banks 1931	Some Neuropteroid Insects from the Malay Peninsula
Isoscelipteron nicobaricum (Navás, 1912)	ASI	Malaysia		Pulau Lalang, West Coast	2°07'N, 102°20'E	Banks 1931	Some Neuropteroid Insects from the Malay Peninsula
Isoscelipteron nicobaricum (Navás, 1912)	ASI	Malaysia	Borneo	Samawang	5°53'N, 118°02'E	Banks 1931	Some Neuropteroid Insects from the Malay Peninsula
Isoscelipteron nicobaricum (Navás, 1912)	ASI	Malaysia	Borneo	Bettotan	5°50'N, 118°07'E	Banks 1931	Some Neuropteroid Insects from the Malay Peninsula
Isoscelipteron nicobaricum (Navás, 1912)	ASI	Indonesia	Java	Panjang	6°05'S, 105°25'E	New & Sudarman 1988	Neuroptera of the Krakatau Islands, Indonesia
Isoscelipteron okamotonis (Nakahara, 1914)	ASI	Japan				Krüger 1922	Berothidae. Beiträge zu einer Monographie
Isoscelipteron okamotonis (Nakahara, 1914)	ASI	Japan		Minomo cerca de Ozaca		Navás 1929	Monografía de la Familia de los Berótidos
Isoscelipteron okamotonis (Nakahara, 1914)	ASI	Japan	Prov. Kii	Monte Iwawaki		Navás 1929	Monografía de la Familia de los Berótidos
Isoscelipteron okamotonis (Nakahara, 1914)	ASI	Japan		Minomi near Osaka		Nakahara 1914	On the Osmylinae of Japan
Isoscelipteron okamotonis (Nakahara, 1914)	ASI	Japan	Prov. Kii	Monte Iwawaki		Nakahara 1914	On the Osmylinae of Japan
Isoscelipteron okamotonis (Nakahara, 1914)	ASI	Japan	Nagano	Satoyamabe, Matsumoto	36°01'N, 138°01'E	Komatsu 2014	Larvae of the Japanese termitophilous predator I. okamotonis
Isoscelipteron okamotonis (Nakahara, 1914)	ASI	Japan	Honshu	Tokio	35°41'N, 139°37'E	Kuwayama 1962	A Revisional Synopsis of the Neuroptera in Japan
Isoscelipteron okamotonis (Nakahara, 1914)	ASI	Japan	Honshu	Kyoto	35°05'N, 133°55'E	Kuwayama 1962	A Revisional Synopsis of the Neuroptera in Japan
Isoscelipteron okamotonis (Nakahara, 1914)	ASI	Japan	Fukuoka	Kyushu, Fukuoka, Moji	33°56'N, 130°57'E	Kuwayama 1962	A Revisional Synopsis of the Neuroptera in Japan
Isoscelipteron pectinatum (Navás, 1905)	ASI	China		Chang-Hai [=Shanghai]		U. Aspöck & H. Aspöck 1991	Zur Kenntnis des Genus Isoscelipteron
Isoscelipteron pectinatum (Navás, 1905)	ASI	China		Shanghai		Krüger 1922	Berothidae. Beiträge zu einer Monographie
Isoscelipteron philippinicola U. Aspöck & H. Aspöck, 1991	ASI	Philippines				U. Aspöck & H. Aspöck 1991	Zur Kenntnis des Genus Isoscelipteron
Isoscelipteron puncticolle Navás, 1911	ASI	Taiwan		Tainán		Navás 1929	Monografía de la Familia de los Berótidos
Isoscelipteron puncticolle Navás, 1911	ASI	Taiwan		Tainan	23°08'N, 120°11'E	U. Aspöck, Liu & H. Aspöck 2013	The Berothidae of Taiwan
Isoscelipteron puncticolle Navás, 1911	ASI	Taiwan	Kaohsiung	Kosempo	23°04'N, 120°34'E	Esben-Petersen 1913	H. Sauter's Formosa-Ausbeute
Isoscelipteron puncticolle Navás, 1911	ASI	Taiwan		Sokutsu	23°03N, 120°22'E	Esben-Petersen 1913	H. Sauter's Formosa-Ausbeute
Isoscelipteron rufum (Navás, 1912)	AUS	Australia		Moses Ck. 4km N by E Mt. Finnigan	15.47°S, 145.17°E	U. Aspöck & H. Aspöck 1991	Zur Kenntnis des Genus Isoscelipteron
Isoscelipteron rufum (Navás, 1912)	AUS	Australia	Queensland			Krüger 1922	Berothidae. Beiträge zu einer Monographie
Isoscelipteron rufum (Navás, 1912)	AUS	Australia	Queensland			U. Aspöck & H. Aspöck 1981	Weitere Untersuchungen an Berothiden
Isoscelipteron tonkinense (Krüger, 1922)	ASI	Vietnam		Tonkin. Montes Mauson		U. Aspöck & H. Aspöck 1980	Das Genus Isoscelipteron
Isoscelipteron tonkinense (Krüger, 1922)	ASI	Vietnam	Tonkin	Montes Mallon, 2-3000Fuß		Krüger 1922	Berothidae. Beiträge zu einer Monographie
Isoscelipteron tonkinense (Krüger, 1922)	ASI	Vietnam	Tonkin	Montes Mallon, 2-3000Fuß		Navás 1929	Monografía de la Familia de los Berótidos
Lekrugeria koenigi (Esben-Petersen, 1915)	AFR	Sudan		Abu Daleb (Bahr el Abiad)		U. Aspöck & H. Aspöck 1985	Das Genus Lekrugeria Navás
Lekrugeria koenigi (Esben-Petersen, 1915)	AFR	Sudan		Lul (Bahr el Abiad)		U. Aspöck & H. Aspöck 1985	Das Genus Lekrugeria Navás
Lekrugeria koenigi (Esben-Petersen, 1915)	AFR	Sudan		Bahr el Zeraf	9°18'N, 31°42'E	U. Aspöck & H. Aspöck 1985	Das Genus Lekrugeria Navás
Lekrugeria koenigi (Esben-Petersen, 1915)	AFR	Sudan		Bahr el Ghazal	9°03'N, 29°35'E	U. Aspöck & H. Aspöck 1985	Das Genus Lekrugeria Navás
Lekrugeria koenigi (Esben-Petersen, 1915)	AFR	Nigeria		Azare, Gadau		U. Aspöck & H. Aspöck 1985	Das Genus Lekrugeria Navás
Lekrugeria koenigi (Esben-Petersen, 1915)	AFR	Gambia		3.5km S George-Town, Hilltop at Sankuli Kunda, ca. 30m		U. Aspöck & H. Aspöck 1985	Das Genus Lekrugeria Navás
Lekrugeria koenigi (Esben-Petersen, 1915)	AFR	Upper Volta (=Burkina Faso)		9mi S Nobere	11°26'N, 1°10'W	U. Aspöck & H. Aspöck 1985	Das Genus Lekrugeria Navás
Lekrugeria koenigi (Esben-Petersen, 1915)	AFR	Egypt		Lul (Bahr el Abiad)		Navás 1929	Monografía de la Familia de los Berótidos
Lekrugeria koenigi (Esben-Petersen, 1915)	AFR	Egypt		Abu Doleb (Bahr el Abiad)		Navás 1929	Monografía de la Familia de los Berótidos
Lekrugeria koenigi (Esben-Petersen, 1915)	AFR	Egypt		Bahr el Zoraf		Navás 1929	Monografía de la Familia de los Berótidos
Lekrugeria koenigi (Esben-Petersen, 1915)	AFR	Egypt		Bahr el Ghazal		Navás 1929	Monografía de la Familia de los Berótidos
Lekrugeria lineata Navás, 1929	ASI	India	Prov. Centr.	Kappa Indes Anglaises	17°57'N, 82°34'E	U. Aspöck & H. Aspöck 1985	Das Genus Lekrugeria Navás
Lekrugeria lineata Navás, 1929	ASI	India	Prov. centr.	Kappa		Navás 1929	Monografía de la Familia de los Berótidos
Lekrugeria lineata Navás, 1929	ASI	India	Maharashtra	Khandala	18°45'N, 73°22'E	Navás 1929	Insectos de la India
Lekrugeria nepalica U. Aspöck & H. Aspöck, 1986	ASI	Nepal		Mugling 900-1500'		U. Aspöck & H. Aspöck 1986	Das Genus Lekrugeria Navás
Lekrugeria nepalica U. Aspöck & H. Aspöck, 1986	ASI	Burma		Gokheik Burma		U. Aspöck & H. Aspöck 1986	Das Genus Lekrugeria Navás
Lekrugeria sp.	ASI	Pakistan		Hacker NW Chon Saidan	32°46’N, 73°03’E	unpublished det. Aspöck
Lekrugeria sp.	ASI	Pakistan		Hacker N Quaidubad, 12.10.88, 350m	32°24’N, 72°00’E	unpublished det. Aspöck
Lomamyia banksi Carpenter, 1940	NAM	USA	South Carolina	Clemson College		Carpenter 1940	A revision of the Nearctic Hemerobiidae, Berothidae,…
Lomamyia banksi Carpenter, 1940	NAM	USA	Virginia	Falls Church		Carpenter 1940	A revision of the Nearctic Hemerobiidae, Berothidae,…
Lomamyia banksi Carpenter, 1940	NAM	USA	Florida	Monticello		Carpenter 1940	A revision of the Nearctic Hemerobiidae, Berothidae,…
Lomamyia banksi Carpenter, 1940	NAM	USA	Virginia	Nelson Co.		Carpenter 1940	A revision of the Nearctic Hemerobiidae, Berothidae,…
Lomamyia banksi Carpenter, 1940	NAM	USA	Kansas	Manhattan		Carpenter 1940	A revision of the Nearctic Hemerobiidae, Berothidae,…
Lomamyia banksi Carpenter, 1940	NAM	USA	Illinois	Dobson, near Clarksville		Carpenter 1940	A revision of the Nearctic Hemerobiidae, Berothidae,…
Lomamyia banksi Carpenter, 1940	NAM	USA	New York	Wyandanch, Long Island		Carpenter 1940	A revision of the Nearctic Hemerobiidae, Berothidae,…
Lomamyia banksi Carpenter, 1940	NAM	USA	Alabama	Thomasville		Carpenter 1940	A revision of the Nearctic Hemerobiidae, Berothidae,…
Lomamyia banksi Carpenter, 1940	NAM	USA	Columbia	Washington		Carpenter 1940	A revision of the Nearctic Hemerobiidae, Berothidae,…
Lomamyia banksi Carpenter, 1940	NAM	USA	Illinois	Pike		Carpenter 1940	A revision of the Nearctic Hemerobiidae, Berothidae,…
Lomamyia banksi Carpenter, 1940	NAM	USA	Illinois	Anna		Carpenter 1940	A revision of the Nearctic Hemerobiidae, Berothidae,…
Lomamyia banksi Carpenter, 1940	NAM	USA	Florida	Hilliard		Carpenter 1940	A revision of the Nearctic Hemerobiidae, Berothidae,…
Lomamyia banksi Carpenter, 1940	NAM	USA	Alabama	Jackson		Carpenter 1940	A revision of the Nearctic Hemerobiidae, Berothidae,…
Lomamyia banksi Carpenter, 1940	NAM	USA	Mississippi	Fulton		Carpenter 1940	A revision of the Nearctic Hemerobiidae, Berothidae,…
Lomamyia banksi Carpenter, 1940	NAM	USA	Mississippi	Hamilton		Carpenter 1940	A revision of the Nearctic Hemerobiidae, Berothidae,…
Lomamyia banksi Carpenter, 1940	NAM	USA	Missouri			Carpenter 1940	A revision of the Nearctic Hemerobiidae, Berothidae,…
Lomamyia banksi Carpenter, 1940	NAM	USA	Arizona	Santa Rita Mts.		Carpenter 1940	A revision of the Nearctic Hemerobiidae, Berothidae,…
Lomamyia banksi Carpenter, 1940	NAM	USA	Illinois	Jeff		Carpenter 1940	A revision of the Nearctic Hemerobiidae, Berothidae,…
Lomamyia banksi Carpenter, 1940	NAM	USA	Michigan	Douglass Lake		Carpenter 1940	A revision of the Nearctic Hemerobiidae, Berothidae,…
Lomamyia banksi Carpenter, 1940	NAM	USA	Arkansas	Logan Co., Mt. Magazine		Faulkner 1992	A revision of the genus Lomamyia Banks
Lomamyia banksi Carpenter, 1940	NAM	USA	Arkansas	Sharp Co., Spring River		Faulkner 1992	A revision of the genus Lomamyia Banks
Lomamyia banksi Carpenter, 1940	NAM	USA	Florida	Alachua Co., Gainsville		Faulkner 1992	A revision of the genus Lomamyia Banks
Lomamyia banksi Carpenter, 1940	NAM	USA	Florida	Hillard		Faulkner 1992	A revision of the genus Lomamyia Banks
Lomamyia banksi Carpenter, 1940	NAM	USA	Florida	Liberty Co.: Torreya St. Pk.		Faulkner 1992	A revision of the genus Lomamyia Banks
Lomamyia banksi Carpenter, 1940	NAM	USA	Illinois	Macon Co.		Faulkner 1992	A revision of the genus Lomamyia Banks
Lomamyia banksi Carpenter, 1940	NAM	USA	Kansas	Douglas Co.: vic. Lawrence		Faulkner 1992	A revision of the genus Lomamyia Banks
Lomamyia banksi Carpenter, 1940	NAM	USA	Mississippi	Falton		Faulkner 1992	A revision of the genus Lomamyia Banks
Lomamyia banksi Carpenter, 1940	NAM	USA	Mississippi	Hamilton		Faulkner 1992	A revision of the genus Lomamyia Banks
Lomamyia banksi Carpenter, 1940	NAM	USA	Oklahoma	Latimer Co.		Faulkner 1992	A revision of the genus Lomamyia Banks
Lomamyia banksi Carpenter, 1940	NAM	USA	South Carolina	Dovehaven, 7mi NE Pickens		Faulkner 1992	A revision of the genus Lomamyia Banks
Lomamyia banksi Carpenter, 1940	NAM	USA	South Carolina	Greenville		Faulkner 1992	A revision of the genus Lomamyia Banks
Lomamyia banksi Carpenter, 1940	NAM	USA	Texas	10mi S Elkhart		Faulkner 1992	A revision of the genus Lomamyia Banks
Lomamyia banksi Carpenter, 1940	NAM	USA	Virginia	Falls Church		Faulkner 1992	A revision of the genus Lomamyia Banks
Lomamyia banksi Carpenter, 1940	NAM	USA	Columbia	Washington, D.C.		Gurney 1947	Notes on Dilaridae and Berothidae
Lomamyia banksi Carpenter, 1940	NAM	USA	Texas	Buffalo	31°16'N, 96°06'W	Carpenter 1942	Notes on Nearctic Neuroptera
Lomamyia flavicornis (Walker, 1853)	NAM	USA	Virginia	Falls Church		Banks 1905	A revision of the Nearctic Hemerobiidae
Lomamyia flavicornis (Walker, 1853)	NAM	USA	New Jersey	Prospertown		Banks 1905	A revision of the Nearctic Hemerobiidae
Lomamyia flavicornis (Walker, 1853)	NAM	USA	New Jersey	Lakehurst		Banks 1905	A revision of the Nearctic Hemerobiidae
Lomamyia flavicornis (Walker, 1853)	NAM	USA	Georgia			Banks 1905	A revision of the Nearctic Hemerobiidae
Lomamyia flavicornis (Walker, 1853)	NAM	USA	Columbia	Washington		Banks 1905	A revision of the Nearctic Hemerobiidae
Lomamyia flavicornis (Walker, 1853)	NAM	USA	Virginia	Falls Church		Banks 1904	A list of neuropteroid insects, exclusive of Odonata, from the vicinity of Washington, D.C.
Lomamyia flavicornis (Walker, 1853)	NAM	USA	Florida	Winter Park		Carpenter 1940	A revision of the Nearctic Hemerobiidae, Berothidae,…
Lomamyia flavicornis (Walker, 1853)	NAM	USA	Alabama	Jackson		Carpenter 1940	A revision of the Nearctic Hemerobiidae, Berothidae,…
Lomamyia flavicornis (Walker, 1853)	NAM	USA	Georgia			Carpenter 1940	A revision of the Nearctic Hemerobiidae, Berothidae,…
Lomamyia flavicornis (Walker, 1853)	NAM	USA	North Carolina	Raleigh		Carpenter 1940	A revision of the Nearctic Hemerobiidae, Berothidae,…
Lomamyia flavicornis (Walker, 1853)	NAM	USA	North Carolina	Southern Pines		Carpenter 1940	A revision of the Nearctic Hemerobiidae, Berothidae,…
Lomamyia flavicornis (Walker, 1853)	NAM	USA	North Carolina	Tryon		Carpenter 1940	A revision of the Nearctic Hemerobiidae, Berothidae,…
Lomamyia flavicornis (Walker, 1853)	NAM	USA	Virginia	Dead Run		Carpenter 1940	A revision of the Nearctic Hemerobiidae, Berothidae,…
Lomamyia flavicornis (Walker, 1853)	NAM	USA	Virginia	Fairfax Co.		Carpenter 1940	A revision of the Nearctic Hemerobiidae, Berothidae,…
Lomamyia flavicornis (Walker, 1853)	NAM	USA	Virginia	Vienna		Carpenter 1940	A revision of the Nearctic Hemerobiidae, Berothidae,…
Lomamyia flavicornis (Walker, 1853)	NAM	USA	Louisiana	Caddo Park		Carpenter 1940	A revision of the Nearctic Hemerobiidae, Berothidae,…
Lomamyia flavicornis (Walker, 1853)	NAM	USA	Maryland	Glen Echo		Carpenter 1940	A revision of the Nearctic Hemerobiidae, Berothidae,…
Lomamyia flavicornis (Walker, 1853)	NAM	USA	New Jersey	Prospertown		Carpenter 1940	A revision of the Nearctic Hemerobiidae, Berothidae,…
Lomamyia flavicornis (Walker, 1853)	NAM	USA	New York	Long Island		Carpenter 1940	A revision of the Nearctic Hemerobiidae, Berothidae,…
Lomamyia flavicornis (Walker, 1853)	NAM	USA	Pennsylvania	Roxboro		Carpenter 1940	A revision of the Nearctic Hemerobiidae, Berothidae,…
Lomamyia flavicornis (Walker, 1853)	NAM	USA	Arkansas	Washington Co.: Fayetteville, Markham Hill		Faulkner 1992	A revision of the genus Lomamyia Banks
Lomamyia flavicornis (Walker, 1853)	NAM	USA	Florida	Alachua Co.: Gainsville, Doyle Conner Building		Faulkner 1992	A revision of the genus Lomamyia Banks
Lomamyia flavicornis (Walker, 1853)	NAM	USA	Florida	Monteoca		Faulkner 1992	A revision of the genus Lomamyia Banks
Lomamyia flavicornis (Walker, 1853)	NAM	USA	Florida	Escambia Co.: Ft. Pickens		Faulkner 1992	A revision of the genus Lomamyia Banks
Lomamyia flavicornis (Walker, 1853)	NAM	USA	Florida	Highlands Co.: Highlands Hammock St. Pk.		Faulkner 1992	A revision of the genus Lomamyia Banks
Lomamyia flavicornis (Walker, 1853)	NAM	USA	Florida	Liberty Co.: Torreya St. Pk.		Faulkner 1992	A revision of the genus Lomamyia Banks
Lomamyia flavicornis (Walker, 1853)	NAM	USA	Florida	Tampa		Faulkner 1992	A revision of the genus Lomamyia Banks
Lomamyia flavicornis (Walker, 1853)	NAM	USA	Georgia	Habersham Co.: 5mi N Batesville		Faulkner 1992	A revision of the genus Lomamyia Banks
Lomamyia flavicornis (Walker, 1853)	NAM	USA	Louisiana	Caddo Park		Faulkner 1992	A revision of the genus Lomamyia Banks
Lomamyia flavicornis (Walker, 1853)	NAM	USA	Maryland	Montgomery Co.: Takoma Park		Faulkner 1992	A revision of the genus Lomamyia Banks
Lomamyia flavicornis (Walker, 1853)	NAM	USA	North Carolina	Southern Pines		Faulkner 1992	A revision of the genus Lomamyia Banks
Lomamyia flavicornis (Walker, 1853)	NAM	USA	South Carolina	Greenville		Faulkner 1992	A revision of the genus Lomamyia Banks
Lomamyia flavicornis (Walker, 1853)	NAM	USA	South Carolina	7 mi NE Pickens, "Dovehaven"		Faulkner 1992	A revision of the genus Lomamyia Banks
Lomamyia flavicornis (Walker, 1853)	NAM	USA	Texas	Dallas Co.; Irving		Faulkner 1992	A revision of the genus Lomamyia Banks
Lomamyia flavicornis (Walker, 1853)	NAM	USA	Virginia	Falls Church		Faulkner 1992	A revision of the genus Lomamyia Banks
Lomamyia flavicornis (Walker, 1853)	NAM	USA	Columbia	Washington, D.C.		Gurney 1947	Notes on Dilaridae and Berothidae
Lomamyia flavicornis (Walker, 1853)	NAM	USA	New Jersey	Lakehurst		Krüger 1922	Berothidae. Beiträge zu einer Monographie
Lomamyia flavicornis (Walker, 1853)	NAM	USA	North Carolina	Tryon		Krüger 1922	Berothidae. Beiträge zu einer Monographie
Lomamyia flavicornis (Walker, 1853)	NAM	USA	Kansas	Manhattan, Wild Cat Creek	39°10'N, 96°34'W	Smith 1923	The life histories and stages of some hemerobiids and allied species
Lomamyia fulva Carpenter, 1940	NAM	USA	California	San Jacinto Mts.		Carpenter 1940	A revision of the Nearctic Hemerobiidae, Berothidae,…
Lomamyia fulva Carpenter, 1940	NAM	USA	California	Riverside Co.: San Jacinto Mts.		Faulkner 1992	A revision of the genus Lomamyia Banks
Lomamyia fulva Carpenter, 1940	NAM	USA	California	Kern Co.: Tehachapi Mt. Pk., 8km SW Tehachapi, 5.000ft		Faulkner 1992	A revision of the genus Lomamyia Banks
Lomamyia fulva Carpenter, 1940	NAM	USA	California	Los Angeles Co.: Devil's Punch Bowl Co. Pk.		Faulkner 1992	A revision of the genus Lomamyia Banks
Lomamyia fulva Carpenter, 1940	NAM	USA	California	Glendale		Faulkner 1992	A revision of the genus Lomamyia Banks
Lomamyia fulva Carpenter, 1940	NAM	USA	California	La Habra Heights		Faulkner 1992	A revision of the genus Lomamyia Banks
Lomamyia fulva Carpenter, 1940	NAM	USA	California	Long Beach		Faulkner 1992	A revision of the genus Lomamyia Banks
Lomamyia fulva Carpenter, 1940	NAM	USA	California	Los Angeles		Faulkner 1992	A revision of the genus Lomamyia Banks
Lomamyia fulva Carpenter, 1940	NAM	USA	California	Santa Monica Mts., 5mi N Beverly Hills, Benedict (Canyon)		Faulkner 1992	A revision of the genus Lomamyia Banks
Lomamyia fulva Carpenter, 1940	NAM	USA	California	Ranch 2.5mi SSW Valyermo		Faulkner 1992	A revision of the genus Lomamyia Banks
Lomamyia fulva Carpenter, 1940	NAM	USA	California	Napa Co.: Spanish Flat, Lake Berryessa		Faulkner 1992	A revision of the genus Lomamyia Banks
Lomamyia fulva Carpenter, 1940	NAM	USA	California	Orange Co.: Anaheim, 4mi E Olive		Faulkner 1992	A revision of the genus Lomamyia Banks
Lomamyia fulva Carpenter, 1940	NAM	USA	California	Riverside Co.: Palm Springs, Chino Cyn.		Faulkner 1992	A revision of the genus Lomamyia Banks
Lomamyia fulva Carpenter, 1940	NAM	USA	California	Riverside		Faulkner 1992	A revision of the genus Lomamyia Banks
Lomamyia fulva Carpenter, 1940	NAM	USA	California	San Jacinto Mts., Idyllwild		Faulkner 1992	A revision of the genus Lomamyia Banks
Lomamyia fulva Carpenter, 1940	NAM	USA	California	San Timoteo Canyon		Faulkner 1992	A revision of the genus Lomamyia Banks
Lomamyia fulva Carpenter, 1940	NAM	USA	California	Tool Box Springs P. C.		Faulkner 1992	A revision of the genus Lomamyia Banks
Lomamyia fulva Carpenter, 1940	NAM	USA	California	San Bernardino Co.: Forest Falls, Mill Creek		Faulkner 1992	A revision of the genus Lomamyia Banks
Lomamyia fulva Carpenter, 1940	NAM	USA	California	1mi N Upland		Faulkner 1992	A revision of the genus Lomamyia Banks
Lomamyia fulva Carpenter, 1940	NAM	USA	California	Wrightwood		Faulkner 1992	A revision of the genus Lomamyia Banks
Lomamyia fulva Carpenter, 1940	NAM	USA	California	San Diego Co.: Alpine		Faulkner 1992	A revision of the genus Lomamyia Banks
Lomamyia fulva Carpenter, 1940	NAM	USA	California	Boulevard		Faulkner 1992	A revision of the genus Lomamyia Banks
Lomamyia fulva Carpenter, 1940	NAM	USA	California	La Jolla		Faulkner 1992	A revision of the genus Lomamyia Banks
Lomamyia fulva Carpenter, 1940	NAM	USA	California	Pine Valley		Faulkner 1992	A revision of the genus Lomamyia Banks
Lomamyia fulva Carpenter, 1940	NAM	USA	California	San Vicente Res., S. end		Faulkner 1992	A revision of the genus Lomamyia Banks
Lomamyia fulva Carpenter, 1940	NAM	USA	California	San Luis Obispo Co.: Cal Poly		Faulkner 1992	A revision of the genus Lomamyia Banks
Lomamyia fulva Carpenter, 1940	NAM	USA	California	2mi E Rinconada		Faulkner 1992	A revision of the genus Lomamyia Banks
Lomamyia fulva Carpenter, 1940	NAM	USA	California	Hays		Faulkner 1992	A revision of the genus Lomamyia Banks
Lomamyia fulva Carpenter, 1940	NAM	USA	California	San Luis Obispo, Res. Canyon		Faulkner 1992	A revision of the genus Lomamyia Banks
Lomamyia fulva Carpenter, 1940	NAM	USA	California	Santa Barbara Co.: 1mi N San Marcos Pass		Faulkner 1992	A revision of the genus Lomamyia Banks
Lomamyia fulva Carpenter, 1940	NAM	USA	California	3mi N Refugio Beach		Faulkner 1992	A revision of the genus Lomamyia Banks
Lomamyia fulva Carpenter, 1940	NAM	USA	California	Santa Cruz Island, Central Valley		Faulkner 1992	A revision of the genus Lomamyia Banks
Lomamyia fulva Carpenter, 1940	NAM	USA	California	Tulare Co.: Cannell Meadow		Faulkner 1992	A revision of the genus Lomamyia Banks
Lomamyia fulva Carpenter, 1940	NAM	USA	California	Yolo Co.: Putah Canyon		Faulkner 1992	A revision of the genus Lomamyia Banks
Lomamyia fulva Carpenter, 1940	NAM	Mexico		Guadeloupe Island, Pacific Ocean		Faulkner 1992	A revision of the genus Lomamyia Banks
Lomamyia hamata (Walker, 1853)	NAM	USA	Florida	Tampa		Carpenter 1940	A revision of the Nearctic Hemerobiidae, Berothidae,…
Lomamyia hamata (Walker, 1853)	NAM	USA	Florida	Cedar Keys		Carpenter 1940	A revision of the Nearctic Hemerobiidae, Berothidae,…
Lomamyia hamata (Walker, 1853)	NAM	USA	Florida	Punta Gorda		Faulkner 1992	A revision of the genus Lomamyia Banks
Lomamyia hamata (Walker, 1853)	NAM	USA	Florida	Highlands Co: Lake Placid, Archbold Bio. Station		Faulkner 1992	A revision of the genus Lomamyia Banks
Lomamyia hamata (Walker, 1853)	NAM	USA	Florida	Lake Co: Ocala Nat'l. Forest, Alexander Spring		Faulkner 1992	A revision of the genus Lomamyia Banks
Lomamyia hamata (Walker, 1853)	NAM	USA	Florida	Levy Co: 3.8mi SW Archer		Faulkner 1992	A revision of the genus Lomamyia Banks
Lomamyia hamata (Walker, 1853)	NAM	USA	Florida	Marion Co.: Ocala Nat'l Forest, vic. Hopkins Prairie		Faulkner 1992	A revision of the genus Lomamyia Banks
Lomamyia hamata (Walker, 1853)	NAM	USA	Florida	Putnam Co: University Reserve, Welaka		Faulkner 1992	A revision of the genus Lomamyia Banks
Lomamyia hamata (Walker, 1853)	NAM	USA	Florida	Cedar Keys		Navás 1929	Monografía de la Familia de los Berótidos
Lomamyia hamata (Walker, 1853)	NAM	USA	South Carolina	Clemson	34°39’N, 82°50’W	Brushwein 1987	Bionomics of Lomamyia hamata
Lomamyia hamata (Walker, 1853)	NAM	Cuba	Santa Lucia	Nuevitas, Camagüey	21°32'N, 77°15'W	Alayo 1958	Los Neuropteridos de Cuba
Lomamyia latipennis Carpenter, 1940	NAM	USA	California	Phoenix Lake, Marin Co.		Carpenter 1940	A revision of the Nearctic Hemerobiidae, Berothidae,…
Lomamyia latipennis Carpenter, 1940	NAM	USA	California	Mt. Tamalpais, Marin Co.		Carpenter 1940	A revision of the Nearctic Hemerobiidae, Berothidae,…
Lomamyia latipennis Carpenter, 1940	NAM	USA	California	Cayton, Shasta Co.		Carpenter 1940	A revision of the Nearctic Hemerobiidae, Berothidae,…
Lomamyia latipennis Carpenter, 1940	NAM	USA	California	Coleville, Mono Co.		Carpenter 1940	A revision of the Nearctic Hemerobiidae, Berothidae,…
Lomamyia latipennis Carpenter, 1940	NAM	USA	California	Confidence		Carpenter 1940	A revision of the Nearctic Hemerobiidae, Berothidae,…
Lomamyia latipennis Carpenter, 1940	NAM	USA	Arizona	Yarnell		Faulkner 1992	A revision of the genus Lomamyia Banks
Lomamyia latipennis Carpenter, 1940	NAM	USA	Arizona	Pima Co.: Sabino Cyn.		Faulkner 1992	A revision of the genus Lomamyia Banks
Lomamyia latipennis Carpenter, 1940	NAM	USA	California	Calavaras Co.: 4mi E Murphy's, 3000ft		Faulkner 1992	A revision of the genus Lomamyia Banks
Lomamyia latipennis Carpenter, 1940	NAM	USA	California	Contra Costa Co.: Moraga		Faulkner 1992	A revision of the genus Lomamyia Banks
Lomamyia latipennis Carpenter, 1940	NAM	USA	California	El Dorado Co.: Blodgett Forest, 13 mi E Georgetown		Faulkner 1992	A revision of the genus Lomamyia Banks
Lomamyia latipennis Carpenter, 1940	NAM	USA	California	Marin Co: Cazadero		Faulkner 1992	A revision of the genus Lomamyia Banks
Lomamyia latipennis Carpenter, 1940	NAM	USA	California	Mill Valley F. T.		Faulkner 1992	A revision of the genus Lomamyia Banks
Lomamyia latipennis Carpenter, 1940	NAM	USA	California	Novato		Faulkner 1992	A revision of the genus Lomamyia Banks
Lomamyia latipennis Carpenter, 1940	NAM	USA	California	Mendocino Co: 5mi N. Branscomb		Faulkner 1992	A revision of the genus Lomamyia Banks
Lomamyia latipennis Carpenter, 1940	NAM	USA	California	Eel River Rest Stop, Mendocino Nat'l For., 1500ft		Faulkner 1992	A revision of the genus Lomamyia Banks
Lomamyia latipennis Carpenter, 1940	NAM	USA	California	Modoc Co: Upper Rush Creek Campground		Faulkner 1992	A revision of the genus Lomamyia Banks
Lomamyia latipennis Carpenter, 1940	NAM	USA	California	Mono Co: Mono Lake		Faulkner 1992	A revision of the genus Lomamyia Banks
Lomamyia latipennis Carpenter, 1940	NAM	USA	California	Monterey Co.: Arroyo Seco Camp, 1000ft		Faulkner 1992	A revision of the genus Lomamyia Banks
Lomamyia latipennis Carpenter, 1940	NAM	USA	California	Napa Co: N side Howell Mt., 2mi NNE Angwin, 1300ft		Faulkner 1992	A revision of the genus Lomamyia Banks
Lomamyia latipennis Carpenter, 1940	NAM	USA	California	Nevada Co.: Green Valley		Faulkner 1992	A revision of the genus Lomamyia Banks
Lomamyia latipennis Carpenter, 1940	NAM	USA	California	Sagehen Creek		Faulkner 1992	A revision of the genus Lomamyia Banks
Lomamyia latipennis Carpenter, 1940	NAM	USA	California	Sagehen Creek, nr. Hobart Mills		Faulkner 1992	A revision of the genus Lomamyia Banks
Lomamyia latipennis Carpenter, 1940	NAM	USA	California	Orange Co: Trabuco Canyon, Santa Ana Mts.		Faulkner 1992	A revision of the genus Lomamyia Banks
Lomamyia latipennis Carpenter, 1940	NAM	USA	California	Plumas Co.: 2mi W Greenville		Faulkner 1992	A revision of the genus Lomamyia Banks
Lomamyia latipennis Carpenter, 1940	NAM	USA	California	Keddie		Faulkner 1992	A revision of the genus Lomamyia Banks
Lomamyia latipennis Carpenter, 1940	NAM	USA	California	1mi S Meadow Valley, 4100ft		Faulkner 1992	A revision of the genus Lomamyia Banks
Lomamyia latipennis Carpenter, 1940	NAM	USA	California	San Diego Co: Pine Valley		Faulkner 1992	A revision of the genus Lomamyia Banks
Lomamyia latipennis Carpenter, 1940	NAM	USA	California	San Luis Obispo Co: Santa Lucia Range, 2mi NW Cuesta Pass		Faulkner 1992	A revision of the genus Lomamyia Banks
Lomamyia latipennis Carpenter, 1940	NAM	USA	California	Santa Clara Co: Chemeketa Park		Faulkner 1992	A revision of the genus Lomamyia Banks
Lomamyia latipennis Carpenter, 1940	NAM	USA	California	Loma Prieta Mt		Faulkner 1992	A revision of the genus Lomamyia Banks
Lomamyia latipennis Carpenter, 1940	NAM	USA	California	Shasta Co: Big Bend, 2800ft		Faulkner 1992	A revision of the genus Lomamyia Banks
Lomamyia latipennis Carpenter, 1940	NAM	USA	California	Hat Creek P. O.		Faulkner 1992	A revision of the genus Lomamyia Banks
Lomamyia latipennis Carpenter, 1940	NAM	USA	California	1mi NE Montgomery Ck.		Faulkner 1992	A revision of the genus Lomamyia Banks
Lomamyia latipennis Carpenter, 1940	NAM	USA	California	Mountain Gate, 1000ft		Faulkner 1992	A revision of the genus Lomamyia Banks
Lomamyia latipennis Carpenter, 1940	NAM	USA	California	Solano Co: G. L. Stebbins Cold Canyon Res.		Faulkner 1992	A revision of the genus Lomamyia Banks
Lomamyia latipennis Carpenter, 1940	NAM	USA	California	Toulumne Co: Sonora		Faulkner 1992	A revision of the genus Lomamyia Banks
Lomamyia latipennis Carpenter, 1940	NAM	USA	California	Twain Harte, 3500ft		Faulkner 1992	A revision of the genus Lomamyia Banks
Lomamyia latipennis Carpenter, 1940	NAM	USA	California	Yuba Co: Camp Far West Res. Dam		Faulkner 1992	A revision of the genus Lomamyia Banks
Lomamyia latipennis Carpenter, 1940	NAM	USA	Nevada	Elko Co: LaMoille Cyn.		Faulkner 1992	A revision of the genus Lomamyia Banks
Lomamyia latipennis Carpenter, 1940	NAM	USA	Nevada	Lander Co: 30mi S. Austin, Kingston Camp, 7300ft		Faulkner 1992	A revision of the genus Lomamyia Banks
Lomamyia latipennis Carpenter, 1940	NAM	USA	Nevada	Washoe Co: 9mi S. Reno		Faulkner 1992	A revision of the genus Lomamyia Banks
Lomamyia latipennis Carpenter, 1940	NAM	USA	Nevada	Reno		Faulkner 1992	A revision of the genus Lomamyia Banks
Lomamyia latipennis Carpenter, 1940	NAM	USA	Oregon	Jefferson Co: Pelton Dam		Faulkner 1992	A revision of the genus Lomamyia Banks
Lomamyia latipennis Carpenter, 1940	NAM	USA	California	Twain Harte, Tuolumne County		Tauber & Tauber 1968	Lomamyia latipennis Life History and larval descriptions
Lomamyia latipennis Carpenter, 1940	NAM	USA	British Columbia	Lytton	50°13'N, 121°32'W	Toschi 1964 (= Tauber)	Observations on Lomamyia latipennis, with a description of the first instar larva
Lomamyia latipennis Carpenter, 1940	NAM	USA	Nevada	Ormsby County	39°07'N, 117°31'W	Toschi 1964 (= Tauber)	Observations on Lomamyia latipennis, with a description of the first instar larva
Lomamyia latipennis Carpenter, 1940	NAM	USA	Oregon	Pelton Dam, Jefferson County	44°39'N, 121°15'W	Toschi 1964 (= Tauber)	Observations on Lomamyia latipennis, with a description of the first instar larva
Lomamyia latipennis Carpenter, 1940	NAM	USA	California	Sagehen Creek Wildlife Station near Truckee, Nevada County	39°25'N, 120°14'W	Toschi 1964 (= Tauber)	Observations on Lomamyia latipennis, with a description of the first instar larva
Lomamyia longicollis (Walker, 1853)	NAM	USA	South Carolina	Clemson University's Experimental Forest, along Rt. 76, Pickens County, Clemson		Brushwein 1987	Observations on Lomamyia longicollis
Lomamyia longicollis (Walker, 1853)	NAM	USA	Georgia	Abbot		Carpenter 1940	A revision of the Nearctic Hemerobiidae, Berothidae,…
Lomamyia longicollis (Walker, 1853)	NAM	USA	Georgia	Prattsburg		Carpenter 1940	A revision of the Nearctic Hemerobiidae, Berothidae,…
Lomamyia longicollis (Walker, 1853)	NAM	USA	Mississippi	Ocean Springs		Carpenter 1940	A revision of the Nearctic Hemerobiidae, Berothidae,…
Lomamyia longicollis (Walker, 1853)	NAM	USA	North Carolina	Warren		Carpenter 1940	A revision of the Nearctic Hemerobiidae, Berothidae,…
Lomamyia longicollis (Walker, 1853)	NAM	USA	Florida	Alachua Co: Gainesville, Austin Cory Forest		Faulkner 1992	A revision of the genus Lomamyia Banks
Lomamyia longicollis (Walker, 1853)	NAM	USA	Florida	Okaloosa Co: FAM (sic!) Biol. Station, 3mi NW Holt		Faulkner 1992	A revision of the genus Lomamyia Banks
Lomamyia longicollis (Walker, 1853)	NAM	USA	Georgie	Clarke Co		Faulkner 1992	A revision of the genus Lomamyia Banks
Lomamyia longicollis (Walker, 1853)	NAM	USA	Maryland	Prince Georges Co: Beltsville		Faulkner 1992	A revision of the genus Lomamyia Banks
Lomamyia longicollis (Walker, 1853)	NAM	USA	Mississippi	Iuka	34°42'N, 87°39'W	Carpenter 1942	Notes on Nearctic Neuroptera
Lomamyia occidentalis (Banks, 1905)	NAM	USA	Nevada	Ormsby Co.		Carpenter 1940	A revision of the Nearctic Hemerobiidae, Berothidae,…
Lomamyia occidentalis (Banks, 1905)	NAM	USA	Arizona	Phoenix		Carpenter 1940	A revision of the Nearctic Hemerobiidae, Berothidae,…
Lomamyia occidentalis (Banks, 1905)	NAM	USA	California	Clayton		Carpenter 1940	A revision of the Nearctic Hemerobiidae, Berothidae,…
Lomamyia occidentalis (Banks, 1905)	NAM	USA	California	San Diego		Carpenter 1940	A revision of the Nearctic Hemerobiidae, Berothidae,…
Lomamyia occidentalis (Banks, 1905)	NAM	USA	British Columbia	Lytton		Carpenter 1940	A revision of the Nearctic Hemerobiidae, Berothidae,…
Lomamyia occidentalis (Banks, 1905)	NAM	USA	California	Clayton		Faulkner 1992	A revision of the genus Lomamyia Banks
Lomamyia occidentalis (Banks, 1905)	NAM	USA	California	Lassen Co: Susanville		Faulkner 1992	A revision of the genus Lomamyia Banks
Lomamyia occidentalis (Banks, 1905)	NAM	USA	California	Nevada Co: Sagehen Creek		Faulkner 1992	A revision of the genus Lomamyia Banks
Lomamyia occidentalis (Banks, 1905)	NAM	USA	California	Plumas Co: 4mi W Quincy		Faulkner 1992	A revision of the genus Lomamyia Banks
Lomamyia occidentalis (Banks, 1905)	NAM	USA	California	San Bernardino Co: Lake Arrowhead		Faulkner 1992	A revision of the genus Lomamyia Banks
Lomamyia occidentalis (Banks, 1905)	NAM	USA	California	Camp O-ongo, nr Running Sprs.		Faulkner 1992	A revision of the genus Lomamyia Banks
Lomamyia occidentalis (Banks, 1905)	NAM	USA	California	San Diego Co: San Diego		Faulkner 1992	A revision of the genus Lomamyia Banks
Lomamyia occidentalis (Banks, 1905)	NAM	USA	California	Shasta Co: Hat Creek P. O.		Faulkner 1992	A revision of the genus Lomamyia Banks
Lomamyia occidentalis (Banks, 1905)	NAM	USA	California	10mi N Redding, 900ft		Faulkner 1992	A revision of the genus Lomamyia Banks
Lomamyia occidentalis (Banks, 1905)	NAM	USA	California	2mi S Shingletown		Faulkner 1992	A revision of the genus Lomamyia Banks
Lomamyia occidentalis (Banks, 1905)	NAM	USA	Nevada	Clark Co: Lee Canyon. 38mi NW Las Vegas		Faulkner 1992	A revision of the genus Lomamyia Banks
Lomamyia occidentalis (Banks, 1905)	NAM	USA	Nevada	White Pine Co: Snake Creek, 5mi W Garrison, Utah, 6200ft		Faulkner 1992	A revision of the genus Lomamyia Banks
Lomamyia occidentalis (Banks, 1905)	NAM	USA	Utah	Unitah Co: 5-10mi SW Bonanza, 5600		Faulkner 1992	A revision of the genus Lomamyia Banks
Lomamyia occidentalis (Banks, 1905)	NAM	Mexico	Baja California Norte	N Boundary, Topo Rcho., Sierra Juarez		Faulkner 1992	A revision of the genus Lomamyia Banks
Lomamyia sp.	NAM	USA	California	Shasta Co: 10mi N Redding, 1000ft		Faulkner 1992	A revision of the genus Lomamyia Banks
Lomamyia sp.	NAM	USA	California	Mendocino Co: 7.5mi NE Covelo, 1680ft		Faulkner 1992	A revision of the genus Lomamyia Banks
Lomamyia sp.	NAM	USA	California	Shasta Co: 15mi SE Big Bend		Faulkner 1992	A revision of the genus Lomamyia Banks
Lomamyia sp.	NAM	USA	California	Mountain Gate, 1000ft		Faulkner 1992	A revision of the genus Lomamyia Banks
Lomamyia sp.	NAM	USA	California	2mi W Shingletown		Faulkner 1992	A revision of the genus Lomamyia Banks
Lomamyia sp.	NAM	USA	California	Solano Co: G. L. Stebbins Cold Canyon Res.		Faulkner 1992	A revision of the genus Lomamyia Banks
Lomamyia sp.	NAM	USA	California	Gates Canyon		Faulkner 1992	A revision of the genus Lomamyia Banks
Lomamyia sp.	NAM	USA	California	Vacaville		Faulkner 1992	A revision of the genus Lomamyia Banks
Lomamyia sp.	NAM	USA	California	Tuolumne Co: Sonora		Faulkner 1992	A revision of the genus Lomamyia Banks
Lomamyia sp.	NAM	USA	Idaho	Blaine Co: 3mi W Hailey		Faulkner 1992	A revision of the genus Lomamyia Banks
Lomamyia sp.	NAM	USA	Oregon	Josephine Co: Shady Cove		Faulkner 1992	A revision of the genus Lomamyia Banks
Lomamyia sp.	NAM	Mexico	Jalisco	Mtns. above Durazno, 5500ft		Faulkner 1992	A revision of the genus Lomamyia Banks
Lomamyia squamosa Carpenter, 1940	NAM	USA	Texas	Brownsville		Carpenter 1940	A revision of the Nearctic Hemerobiidae, Berothidae,…
Lomamyia squamosa Carpenter, 1940	NAM	USA	Texas	Sabinal		Carpenter 1940	A revision of the Nearctic Hemerobiidae, Berothidae,…
Lomamyia squamosa Carpenter, 1940	NAM	USA	Texas	Hidalgo Co.		Carpenter 1940	A revision of the Nearctic Hemerobiidae, Berothidae,…
Lomamyia squamosa Carpenter, 1940	NAM	USA	Texas	Cypress Mill		Carpenter 1940	A revision of the Nearctic Hemerobiidae, Berothidae,…
Lomamyia squamosa Carpenter, 1940	NAM	USA	Texas	McAllen		Carpenter 1940	A revision of the Nearctic Hemerobiidae, Berothidae,…
Lomamyia squamosa Carpenter, 1940	NAM	USA	Texas	Devil's River		Carpenter 1940	A revision of the Nearctic Hemerobiidae, Berothidae,…
Lomamyia squamosa Carpenter, 1940	NAM	USA	Arizona	Congress Junction		Faulkner 1992	A revision of the genus Lomamyia Banks
Lomamyia squamosa Carpenter, 1940	NAM	USA	Arizona	Organ Pipe Cactus Nat'l Mon.		Faulkner 1992	A revision of the genus Lomamyia Banks
Lomamyia squamosa Carpenter, 1940	NAM	USA	Arizona	Cochise Co: Portal		Faulkner 1992	A revision of the genus Lomamyia Banks
Lomamyia squamosa Carpenter, 1940	NAM	USA	Arizona	Chiricahua Mtns, 7mi W Portal, Silver Creek Wash		Faulkner 1992	A revision of the genus Lomamyia Banks
Lomamyia squamosa Carpenter, 1940	NAM	USA	Arizona	13 mi E Douglas, San Bernardino Ranch		Faulkner 1992	A revision of the genus Lomamyia Banks
Lomamyia squamosa Carpenter, 1940	NAM	USA	Arizona	Maricopa Co: Wickenburg		Faulkner 1992	A revision of the genus Lomamyia Banks
Lomamyia squamosa Carpenter, 1940	NAM	USA	Arizona	Pima Co: Tucson, Piedra Seca, 5830ft		Faulkner 1992	A revision of the genus Lomamyia Banks
Lomamyia squamosa Carpenter, 1940	NAM	USA	Arizona	Tucson, N. Jackson		Faulkner 1992	A revision of the genus Lomamyia Banks
Lomamyia squamosa Carpenter, 1940	NAM	USA	Arizona	Pinal Co: Picacho Peak		Faulkner 1992	A revision of the genus Lomamyia Banks
Lomamyia squamosa Carpenter, 1940	NAM	USA	Arizona	Santa Cruz Co: Pena Blanca		Faulkner 1992	A revision of the genus Lomamyia Banks
Lomamyia squamosa Carpenter, 1940	NAM	USA	California	Los Angeles Co: 2.5mi SSW Valyermo, 4800ft		Faulkner 1992	A revision of the genus Lomamyia Banks
Lomamyia squamosa Carpenter, 1940	NAM	USA	California	Riverside Co: Deep Canyon		Faulkner 1992	A revision of the genus Lomamyia Banks
Lomamyia squamosa Carpenter, 1940	NAM	USA	California	Deep Canyon, 4 mi S Palm Desert		Faulkner 1992	A revision of the genus Lomamyia Banks
Lomamyia squamosa Carpenter, 1940	NAM	USA	California	Palm Springs		Faulkner 1992	A revision of the genus Lomamyia Banks
Lomamyia squamosa Carpenter, 1940	NAM	USA	California	Quail Valley		Faulkner 1992	A revision of the genus Lomamyia Banks
Lomamyia squamosa Carpenter, 1940	NAM	USA	California	San Jacinito Mtns., Tramway		Faulkner 1992	A revision of the genus Lomamyia Banks
Lomamyia squamosa Carpenter, 1940	NAM	USA	California	San Diego Co: Alpine		Faulkner 1992	A revision of the genus Lomamyia Banks
Lomamyia squamosa Carpenter, 1940	NAM	USA	California	2mi W Borrego Springs		Faulkner 1992	A revision of the genus Lomamyia Banks
Lomamyia squamosa Carpenter, 1940	NAM	USA	California	Del Mar		Faulkner 1992	A revision of the genus Lomamyia Banks
Lomamyia squamosa Carpenter, 1940	NAM	USA	California	El Capitan Res.		Faulkner 1992	A revision of the genus Lomamyia Banks
Lomamyia squamosa Carpenter, 1940	NAM	USA	California	Eucalyptus Hills, Lakeside		Faulkner 1992	A revision of the genus Lomamyia Banks
Lomamyia squamosa Carpenter, 1940	NAM	USA	California	Pine Valley		Faulkner 1992	A revision of the genus Lomamyia Banks
Lomamyia squamosa Carpenter, 1940	NAM	USA	California	Scissors Xing, 2240-2800ft		Faulkner 1992	A revision of the genus Lomamyia Banks
Lomamyia squamosa Carpenter, 1940	NAM	USA	California	Tulare Co: Kennedy Meadows Campgd., 6100ft		Faulkner 1992	A revision of the genus Lomamyia Banks
Lomamyia squamosa Carpenter, 1940	NAM	USA	Nevada	Nye Co: Ichthyosaur St. Pk.		Faulkner 1992	A revision of the genus Lomamyia Banks
Lomamyia squamosa Carpenter, 1940	NAM	USA	New Mexico	Antelope Wells		Faulkner 1992	A revision of the genus Lomamyia Banks
Lomamyia squamosa Carpenter, 1940	NAM	USA	Texas	Brownsville		Faulkner 1992	A revision of the genus Lomamyia Banks
Lomamyia squamosa Carpenter, 1940	NAM	USA	Texas	McAlles		Faulkner 1992	A revision of the genus Lomamyia Banks
Lomamyia squamosa Carpenter, 1940	NAM	USA	Texas	Bexar Co: Brooks A. F. B.		Faulkner 1992	A revision of the genus Lomamyia Banks
Lomamyia squamosa Carpenter, 1940	NAM	USA	Texas	San Antonio		Faulkner 1992	A revision of the genus Lomamyia Banks
Lomamyia squamosa Carpenter, 1940	NAM	USA	Texas	Brewster Co: Big Bend Nat'l Pk., Chisos Mtns		Faulkner 1992	A revision of the genus Lomamyia Banks
Lomamyia squamosa Carpenter, 1940	NAM	USA	Texas	The Basin		Faulkner 1992	A revision of the genus Lomamyia Banks
Lomamyia squamosa Carpenter, 1940	NAM	USA	Texas	Rio Grande Village		Faulkner 1992	A revision of the genus Lomamyia Banks
Lomamyia squamosa Carpenter, 1940	NAM	USA	Texas	Dimmit Co: Chaparral WMA		Faulkner 1992	A revision of the genus Lomamyia Banks
Lomamyia squamosa Carpenter, 1940	NAM	USA	Texas	Frio Co: 4mi S Pearsall		Faulkner 1992	A revision of the genus Lomamyia Banks
Lomamyia squamosa Carpenter, 1940	NAM	USA	Texas	Hidalgo Co.		Faulkner 1992	A revision of the genus Lomamyia Banks
Lomamyia squamosa Carpenter, 1940	NAM	USA	Texas	Weslaco		Faulkner 1992	A revision of the genus Lomamyia Banks
Lomamyia squamosa Carpenter, 1940	NAM	USA	Texas	Jim Wells Co: La Copita Res. Area		Faulkner 1992	A revision of the genus Lomamyia Banks
Lomamyia squamosa Carpenter, 1940	NAM	USA	Texas	LaSalle Co: Chaparral WMA		Faulkner 1992	A revision of the genus Lomamyia Banks
Lomamyia squamosa Carpenter, 1940	NAM	USA	Texas	San Patricio Co: Welder		Faulkner 1992	A revision of the genus Lomamyia Banks
Lomamyia squamosa Carpenter, 1940	NAM	Mexico		San Estaban Island, SW end		Faulkner 1992	A revision of the genus Lomamyia Banks
Lomamyia squamosa Carpenter, 1940	NAM	Mexico	Baja California Norte	Calmalli		Faulkner 1992	A revision of the genus Lomamyia Banks
Lomamyia squamosa Carpenter, 1940	NAM	Mexico	Baja California Norte	Catavina		Faulkner 1992	A revision of the genus Lomamyia Banks
Lomamyia squamosa Carpenter, 1940	NAM	Mexico	Baja California Norte	Cedros Island		Faulkner 1992	A revision of the genus Lomamyia Banks
Lomamyia squamosa Carpenter, 1940	NAM	Mexico	Baja California Norte	5mi E Ejido Bonfil		Faulkner 1992	A revision of the genus Lomamyia Banks
Lomamyia squamosa Carpenter, 1940	NAM	Mexico	Baja California Norte	17mi S Ensenada		Faulkner 1992	A revision of the genus Lomamyia Banks
Lomamyia squamosa Carpenter, 1940	NAM	Mexico	Baja California Norte	Chapala Dry Lake		Faulkner 1992	A revision of the genus Lomamyia Banks
Lomamyia squamosa Carpenter, 1940	NAM	Mexico	Baja California Norte	7mi S Chapala		Faulkner 1992	A revision of the genus Lomamyia Banks
Lomamyia squamosa Carpenter, 1940	NAM	Mexico	Baja California Norte	10.2mi W Rcho. Progreso		Faulkner 1992	A revision of the genus Lomamyia Banks
Lomamyia squamosa Carpenter, 1940	NAM	Mexico	Baja California Norte	Sierra Juarez, El Tajo Canyon		Faulkner 1992	A revision of the genus Lomamyia Banks
Lomamyia squamosa Carpenter, 1940	NAM	Mexico	Baja California Norte	Valle de Trinidad, nr. La Zapopita		Faulkner 1992	A revision of the genus Lomamyia Banks
Lomamyia squamosa Carpenter, 1940	NAM	Mexico	Baja California Sur	1.5mi SW San Miguel de Comondu		Faulkner 1992	A revision of the genus Lomamyia Banks
Lomamyia squamosa Carpenter, 1940	NAM	Mexico	Baja California Sur	51.3mi S Guerrero Negro		Faulkner 1992	A revision of the genus Lomamyia Banks
Lomamyia squamosa Carpenter, 1940	NAM	Mexico	Baja California Sur	3mi NW La Palmilla, Hwy. 19		Faulkner 1992	A revision of the genus Lomamyia Banks
Lomamyia squamosa Carpenter, 1940	NAM	Mexico	Baja California Sur	Las Barracas, 25mi E Santiago		Faulkner 1992	A revision of the genus Lomamyia Banks
Lomamyia squamosa Carpenter, 1940	NAM	Mexico	Baja California Sur	7mi S. Punta Colorada		Faulkner 1992	A revision of the genus Lomamyia Banks
Lomamyia squamosa Carpenter, 1940	NAM	Mexico	Baja California Sur	9mi E San Antonio		Faulkner 1992	A revision of the genus Lomamyia Banks
Lomamyia squamosa Carpenter, 1940	NAM	Mexico	Baja California Sur	10mi SW San José del Cabo		Faulkner 1992	A revision of the genus Lomamyia Banks
Lomamyia squamosa Carpenter, 1940	NAM	Mexico	Chiapas	7.2mi SE Chiapa de Corzo		Faulkner 1992	A revision of the genus Lomamyia Banks
Lomamyia squamosa Carpenter, 1940	NAM	Mexico	Chiapas	28mi W Cintalapa		Faulkner 1992	A revision of the genus Lomamyia Banks
Lomamyia squamosa Carpenter, 1940	NAM	Mexico	Chiapas	31mi SE Comitan		Faulkner 1992	A revision of the genus Lomamyia Banks
Lomamyia squamosa Carpenter, 1940	NAM	Mexico	Coahuila	dunes at Bilbao, 8mi N Viesca		Faulkner 1992	A revision of the genus Lomamyia Banks
Lomamyia squamosa Carpenter, 1940	NAM	Mexico	Colima	13mi N Manzanillo, micro. Toro		Faulkner 1992	A revision of the genus Lomamyia Banks
Lomamyia squamosa Carpenter, 1940	NAM	Mexico	Guerrero	24mi S Iguala		Faulkner 1992	A revision of the genus Lomamyia Banks
Lomamyia squamosa Carpenter, 1940	NAM	Mexico	Guerrero	Xalitla, 5.2mi N Mezcala, 1620ft		Faulkner 1992	A revision of the genus Lomamyia Banks
Lomamyia squamosa Carpenter, 1940	NAM	Mexico	Jalisco	Chamela, UNAM		Faulkner 1992	A revision of the genus Lomamyia Banks
Lomamyia squamosa Carpenter, 1940	NAM	Mexico	Morelos	Yautepec		Faulkner 1992	A revision of the genus Lomamyia Banks
Lomamyia squamosa Carpenter, 1940	NAM	Mexico	Morelos	Xochicalco Pyramid		Faulkner 1992	A revision of the genus Lomamyia Banks
Lomamyia squamosa Carpenter, 1940	NAM	Mexico	Nayarit	24mi SE Tepic		Faulkner 1992	A revision of the genus Lomamyia Banks
Lomamyia squamosa Carpenter, 1940	NAM	Mexico	Nayarit	1.6mi S Tierra Generosa		Faulkner 1992	A revision of the genus Lomamyia Banks
Lomamyia squamosa Carpenter, 1940	NAM	Mexico	Nuevo Leon	Linares, 1000ft		Faulkner 1992	A revision of the genus Lomamyia Banks
Lomamyia squamosa Carpenter, 1940	NAM	Mexico	Oaxaca	La Asuncion		Faulkner 1992	A revision of the genus Lomamyia Banks
Lomamyia squamosa Carpenter, 1940	NAM	Mexico	Oaxaca	2.7mi NW El Cameron		Faulkner 1992	A revision of the genus Lomamyia Banks
Lomamyia squamosa Carpenter, 1940	NAM	Mexico	Oaxaca	2.1mi E Jalapa de Marques		Faulkner 1992	A revision of the genus Lomamyia Banks
Lomamyia squamosa Carpenter, 1940	NAM	Mexico	Oaxaca	23mi S Matias Romero		Faulkner 1992	A revision of the genus Lomamyia Banks
Lomamyia squamosa Carpenter, 1940	NAM	Mexico	Oaxaca	San Juanico		Faulkner 1992	A revision of the genus Lomamyia Banks
Lomamyia squamosa Carpenter, 1940	NAM	Mexico	Oaxaca	9mi NW Tamazulapan		Faulkner 1992	A revision of the genus Lomamyia Banks
Lomamyia squamosa Carpenter, 1940	NAM	Mexico	Oaxaca	12mi W Tehuantepec		Faulkner 1992	A revision of the genus Lomamyia Banks
Lomamyia squamosa Carpenter, 1940	NAM	Mexico	Oaxaca	Tequisistlan		Faulkner 1992	A revision of the genus Lomamyia Banks
Lomamyia squamosa Carpenter, 1940	NAM	Mexico	Oaxaca	8mi N La Ventosa		Faulkner 1992	A revision of the genus Lomamyia Banks
Lomamyia squamosa Carpenter, 1940	NAM	Mexico	Puebla	34 mi SE Acatlan		Faulkner 1992	A revision of the genus Lomamyia Banks
Lomamyia squamosa Carpenter, 1940	NAM	Mexico	Puebla	3-5mi E Izucar de Matamoras		Faulkner 1992	A revision of the genus Lomamyia Banks
Lomamyia squamosa Carpenter, 1940	NAM	Mexico	Puebla	4mi SE Las Penas		Faulkner 1992	A revision of the genus Lomamyia Banks
Lomamyia squamosa Carpenter, 1940	NAM	Mexico	Puebla	3mi N Petalcingo		Faulkner 1992	A revision of the genus Lomamyia Banks
Lomamyia squamosa Carpenter, 1940	NAM	Mexico	Puebla	6mi SW Tehuacan		Faulkner 1992	A revision of the genus Lomamyia Banks
Lomamyia squamosa Carpenter, 1940	NAM	Mexico	Puebla	2mi SW Tehuacan, 5300ft		Faulkner 1992	A revision of the genus Lomamyia Banks
Lomamyia squamosa Carpenter, 1940	NAM	Mexico	Puebla	9.9mi NE Zapotitlan		Faulkner 1992	A revision of the genus Lomamyia Banks
Lomamyia squamosa Carpenter, 1940	NAM	Mexico	Queretaro	1mi NW Ayutlan		Faulkner 1992	A revision of the genus Lomamyia Banks
Lomamyia squamosa Carpenter, 1940	NAM	Mexico	Queretaro	6.3mi N Queretaro		Faulkner 1992	A revision of the genus Lomamyia Banks
Lomamyia squamosa Carpenter, 1940	NAM	Mexico	San Luis Potosi	Ciudad Valles		Faulkner 1992	A revision of the genus Lomamyia Banks
Lomamyia squamosa Carpenter, 1940	NAM	Mexico	Sinaloa	28.2mi E Concordia		Faulkner 1992	A revision of the genus Lomamyia Banks
Lomamyia squamosa Carpenter, 1940	NAM	Mexico	Sinaloa	16mi S Guamuchil		Faulkner 1992	A revision of the genus Lomamyia Banks
Lomamyia squamosa Carpenter, 1940	NAM	Mexico	Sinaloa	11mi S Guasave		Faulkner 1992	A revision of the genus Lomamyia Banks
Lomamyia squamosa Carpenter, 1940	NAM	Mexico	Sinaloa	13.2mi N Guasave		Faulkner 1992	A revision of the genus Lomamyia Banks
Lomamyia squamosa Carpenter, 1940	NAM	Mexico	Sinaloa	6mi N La Cruz		Faulkner 1992	A revision of the genus Lomamyia Banks
Lomamyia squamosa Carpenter, 1940	NAM	Mexico	Sonora	57mi N Culiacan		Faulkner 1992	A revision of the genus Lomamyia Banks
Lomamyia squamosa Carpenter, 1940	NAM	Mexico	Sonora	16mi SE Empalma		Faulkner 1992	A revision of the genus Lomamyia Banks
Lomamyia squamosa Carpenter, 1940	NAM	Mexico	Sonora	Guaymas		Faulkner 1992	A revision of the genus Lomamyia Banks
Lomamyia squamosa Carpenter, 1940	NAM	Mexico	Sonora	41mi E Guaymas		Faulkner 1992	A revision of the genus Lomamyia Banks
Lomamyia squamosa Carpenter, 1940	NAM	Mexico	Sonora	Hermosillo		Faulkner 1992	A revision of the genus Lomamyia Banks
Lomamyia squamosa Carpenter, 1940	NAM	Mexico	Sonora	La Aduana		Faulkner 1992	A revision of the genus Lomamyia Banks
Lomamyia squamosa Carpenter, 1940	NAM	Mexico	Tamaulipas	8mi W El Limon		Faulkner 1992	A revision of the genus Lomamyia Banks
Lomamyia squamosa Carpenter, 1940	NAM	Mexico	Veracruz	Puente Nacional, 6mi SE Rinconada		Faulkner 1992	A revision of the genus Lomamyia Banks
Lomamyia squamosa Carpenter, 1940	NAM	Mexico	Veracruz	Paso de Ovejas		Faulkner 1992	A revision of the genus Lomamyia Banks
Lomamyia squamosa Carpenter, 1940	NAM	Mexico	Veracruz	Tinajas		Faulkner 1992	A revision of the genus Lomamyia Banks
Lomamyia squamosa Carpenter, 1940	NAM	Mexico	Yucatan	Chichen Itza		Faulkner 1992	A revision of the genus Lomamyia Banks
Lomamyia squamosa Carpenter, 1940	SAM	Belize		Mt. Pine Ridge, Blancaneaux		Faulkner 1992	A revision of the genus Lomamyia Banks
Lomamyia squamosa Carpenter, 1940	SAM	Honduras		Escuela Agricola Panamericana		Faulkner 1992	A revision of the genus Lomamyia Banks
Lomamyia squamosa Carpenter, 1940	SAM	Nicaragua		Dep. de Carazo, Bioreserva de Chococente	86°10'N, 11°30'W	Maes & Flint 1994	Dilarida, Berothidae y Sisyridae (Planipennia)…
Lomamyia tenuis Carpenter, 1940	NAM	USA	New Mexico	Torrance Co.		Carpenter 1940	A revision of the Nearctic Hemerobiidae, Berothidae,…
Lomamyia tenuis Carpenter, 1940	NAM	USA	New Mexico	Torrance Co.		Faulkner 1992	A revision of the genus Lomamyia Banks
Lomamyia tenuis Carpenter, 1940	NAM	USA	Arizona	Cochise Co: Huachuca Mtns; Ash Canyon, 5100ft		Faulkner 1992	A revision of the genus Lomamyia Banks
Lomamyia tenuis Carpenter, 1940	NAM	USA	Nevada	Washoe Co: Empire		Faulkner 1992	A revision of the genus Lomamyia Banks
Lomamyia tenuis Carpenter, 1940	NAM	USA	Nevada	White Pine Co: Mooney Basin		Faulkner 1992	A revision of the genus Lomamyia Banks
Lomamyia tenuis Carpenter, 1940	NAM	USA	New Mexico	White Sands		Faulkner 1992	A revision of the genus Lomamyia Banks
Lomamyia tenuis Carpenter, 1940	NAM	USA	New Mexico	Eddy Co: Hope		Faulkner 1992	A revision of the genus Lomamyia Banks
Lomamyia tenuis Carpenter, 1940	NAM	USA	Texas	Anderson Co: Salmon		Faulkner 1992	A revision of the genus Lomamyia Banks
Lomamyia tenuis Carpenter, 1940	NAM	USA	Texas	Hidalgo Co: Bentsen, Rio Grande St. Pk.		Faulkner 1992	A revision of the genus Lomamyia Banks
Lomamyia tenuis Carpenter, 1940	NAM	USA	New Mexico	Torrance Co.	34°30'N, 105°55'W	Carpenter 1942	Notes on Nearctic Neuroptera
Lomamyia texana (Banks, 1897)	NAM	USA	Texas			Banks 1905	A revision of the Nearctic Hemerobiidae
Lomamyia texana (Banks, 1897)	NAM	USA	Arizona	Phoenix		Banks 1905	A revision of the Nearctic Hemerobiidae
Lomamyia texana (Banks, 1897)	NAM	USA	Nevada	Ormsby County		Banks 1905	A revision of the Nearctic Hemerobiidae
Lomamyia texana (Banks, 1897)	NAM	USA	Arizona	Globe		Carpenter 1940	A revision of the Nearctic Hemerobiidae, Berothidae,…
Lomamyia texana (Banks, 1897)	NAM	USA	Texas	Comfort		Carpenter 1940	A revision of the Nearctic Hemerobiidae, Berothidae,…
Lomamyia texana (Banks, 1897)	NAM	USA	Texas	Davis Mts.		Carpenter 1940	A revision of the Nearctic Hemerobiidae, Berothidae,…
Lomamyia texana (Banks, 1897)	NAM	USA	Arizona	Santa Rita Mts.		Carpenter 1940	A revision of the Nearctic Hemerobiidae, Berothidae,…
Lomamyia texana (Banks, 1897)	NAM	USA	Arizona	Oracle		Carpenter 1940	A revision of the Nearctic Hemerobiidae, Berothidae,…
Lomamyia texana (Banks, 1897)	NAM	USA	Arizona	Oak Creek Canyon		Carpenter 1940	A revision of the Nearctic Hemerobiidae, Berothidae,…
Lomamyia texana (Banks, 1897)	NAM	USA	Arizona	Huachuca Mts.		Carpenter 1940	A revision of the Nearctic Hemerobiidae, Berothidae,…
Lomamyia texana (Banks, 1897)	NAM	USA	Utah	Bellevue		Carpenter 1940	A revision of the Nearctic Hemerobiidae, Berothidae,…
Lomamyia texana (Banks, 1897)	NAM	USA	Utah	Parowan Canyon, Iron Co.		Carpenter 1940	A revision of the Nearctic Hemerobiidae, Berothidae,…
Lomamyia texana (Banks, 1897)	NAM	USA	Arizona	Cochise Co: 1mi W Portal, Cave Creek		Faulkner 1992	A revision of the genus Lomamyia Banks
Lomamyia texana (Banks, 1897)	NAM	USA	Arizona	Chiricahus Mtns., S Fork Camp, Cave Creek		Faulkner 1992	A revision of the genus Lomamyia Banks
Lomamyia texana (Banks, 1897)	NAM	USA	Arizona	Chiricahua Mtns., Portal Ranger Station, 4950ft		Faulkner 1992	A revision of the genus Lomamyia Banks
Lomamyia texana (Banks, 1897)	NAM	USA	Arizona	nr entrance to Chiricahua Nat'l Monument		Faulkner 1992	A revision of the genus Lomamyia Banks
Lomamyia texana (Banks, 1897)	NAM	USA	Arizona	Chiricahua Mtns., Onion Saddle Rd., 7mi SSE Turkey Creek		Faulkner 1992	A revision of the genus Lomamyia Banks
Lomamyia texana (Banks, 1897)	NAM	USA	Arizona	Cottonwood Canyon, 5208ft		Faulkner 1992	A revision of the genus Lomamyia Banks
Lomamyia texana (Banks, 1897)	NAM	USA	Arizona	Huachuca Mts.		Faulkner 1992	A revision of the genus Lomamyia Banks
Lomamyia texana (Banks, 1897)	NAM	USA	Arizona	Huachuca Mtns., Ash Canyon		Faulkner 1992	A revision of the genus Lomamyia Banks
Lomamyia texana (Banks, 1897)	NAM	USA	Arizona	Huachuca Mtns., Ash Canyon, 5100ft		Faulkner 1992	A revision of the genus Lomamyia Banks
Lomamyia texana (Banks, 1897)	NAM	USA	Arizona	Huachuca Mtns., Miller Canyon		Faulkner 1992	A revision of the genus Lomamyia Banks
Lomamyia texana (Banks, 1897)	NAM	USA	Arizona	Huachuca Mtns., Sunnyside		Faulkner 1992	A revision of the genus Lomamyia Banks
Lomamyia texana (Banks, 1897)	NAM	USA	Arizona	8.1mi SE Sunnyside, 5950ft		Faulkner 1992	A revision of the genus Lomamyia Banks
Lomamyia texana (Banks, 1897)	NAM	USA	Arizona	Coconino Co: Flagstaff		Faulkner 1992	A revision of the genus Lomamyia Banks
Lomamyia texana (Banks, 1897)	NAM	USA	Arizona	3mi E Flagstaff, Walnut Canyon, 6600ft		Faulkner 1992	A revision of the genus Lomamyia Banks
Lomamyia texana (Banks, 1897)	NAM	USA	Arizona	Midgley Bridge, Oak Creek Canyon		Faulkner 1992	A revision of the genus Lomamyia Banks
Lomamyia texana (Banks, 1897)	NAM	USA	Arizona	3.2mi NW Munds, nr. Sedona, 4500ft		Faulkner 1992	A revision of the genus Lomamyia Banks
Lomamyia texana (Banks, 1897)	NAM	USA	Arizona	52mi N Williams		Faulkner 1992	A revision of the genus Lomamyia Banks
Lomamyia texana (Banks, 1897)	NAM	USA	Arizona	Gila Co: Globe		Faulkner 1992	A revision of the genus Lomamyia Banks
Lomamyia texana (Banks, 1897)	NAM	USA	Arizona	Graham Co: Pinaleno MTns., Marijilua Canyon, 4300ft		Faulkner 1992	A revision of the genus Lomamyia Banks
Lomamyia texana (Banks, 1897)	NAM	USA	Arizona	Pima Co: Madera Canyon, Bogg Sprgs, 4500ft		Faulkner 1992	A revision of the genus Lomamyia Banks
Lomamyia texana (Banks, 1897)	NAM	USA	Arizona	Santa Rita Mts., Madera Canyon		Faulkner 1992	A revision of the genus Lomamyia Banks
Lomamyia texana (Banks, 1897)	NAM	USA	Arizona	Santa Cruz Co: Madera Canyon, 4880ft		Faulkner 1992	A revision of the genus Lomamyia Banks
Lomamyia texana (Banks, 1897)	NAM	USA	Arizona	Pena Blanca		Faulkner 1992	A revision of the genus Lomamyia Banks
Lomamyia texana (Banks, 1897)	NAM	USA	Arizona	Yavapai Co: 4mi N Prescott		Faulkner 1992	A revision of the genus Lomamyia Banks
Lomamyia texana (Banks, 1897)	NAM	USA	Arizona	4mi N Prescott, Granite Dells		Faulkner 1992	A revision of the genus Lomamyia Banks
Lomamyia texana (Banks, 1897)	NAM	USA	Arizona	5mi N Prescott		Faulkner 1992	A revision of the genus Lomamyia Banks
Lomamyia texana (Banks, 1897)	NAM	USA	Arizona	4.5mi S Prescott, Loba Lodge, Groom Creek, 6100ft		Faulkner 1992	A revision of the genus Lomamyia Banks
Lomamyia texana (Banks, 1897)	NAM	USA	Arizona	Prescott		Faulkner 1992	A revision of the genus Lomamyia Banks
Lomamyia texana (Banks, 1897)	NAM	USA	California	Los Angeles Co: Juniper Hills		Faulkner 1992	A revision of the genus Lomamyia Banks
Lomamyia texana (Banks, 1897)	NAM	USA	California	3mi S Pearblossom		Faulkner 1992	A revision of the genus Lomamyia Banks
Lomamyia texana (Banks, 1897)	NAM	USA	California	Mono Co: Tom's Place		Faulkner 1992	A revision of the genus Lomamyia Banks
Lomamyia texana (Banks, 1897)	NAM	USA	California	Riverside Co: Joshua Tree N. M., Lower Covington Flat		Faulkner 1992	A revision of the genus Lomamyia Banks
Lomamyia texana (Banks, 1897)	NAM	USA	California	Joshua Tree N. M., Pinyon Wells		Faulkner 1992	A revision of the genus Lomamyia Banks
Lomamyia texana (Banks, 1897)	NAM	USA	California	Joshua Tree N. M., Winnona		Faulkner 1992	A revision of the genus Lomamyia Banks
Lomamyia texana (Banks, 1897)	NAM	USA	California	Pleasant Valley, Quail Guzzler		Faulkner 1992	A revision of the genus Lomamyia Banks
Lomamyia texana (Banks, 1897)	NAM	USA	California	San Bernardino Co: New York Mtns., Caruthers Canyon, 5680ft		Faulkner 1992	A revision of the genus Lomamyia Banks
Lomamyia texana (Banks, 1897)	NAM	USA	California	New York Mtns., Keystone Canyon		Faulkner 1992	A revision of the genus Lomamyia Banks
Lomamyia texana (Banks, 1897)	NAM	USA	California	Providence Mtns., Globe Canyon, 3500-5000ft		Faulkner 1992	A revision of the genus Lomamyia Banks
Lomamyia texana (Banks, 1897)	NAM	USA	California	Providence Mtns., Summit Springs		Faulkner 1992	A revision of the genus Lomamyia Banks
Lomamyia texana (Banks, 1897)	NAM	USA	Nevada	Lander Co: Austin Summit		Faulkner 1992	A revision of the genus Lomamyia Banks
Lomamyia texana (Banks, 1897)	NAM	USA	Nevada	Nye Co: Ichthyosaur St. Pk.		Faulkner 1992	A revision of the genus Lomamyia Banks
Lomamyia texana (Banks, 1897)	NAM	USA	New Mexico	Chaco Canyon Nat'l. Monument		Faulkner 1992	A revision of the genus Lomamyia Banks
Lomamyia texana (Banks, 1897)	NAM	USA	Texas	Davis Co: Davis Mountains		Faulkner 1992	A revision of the genus Lomamyia Banks
Lomamyia texana (Banks, 1897)	NAM	USA	Texas	Ft. Davis St. P., Lower Limpia Canyon		Faulkner 1992	A revision of the genus Lomamyia Banks
Lomamyia texana (Banks, 1897)	NAM	USA	Utah	Thompson		Faulkner 1992	A revision of the genus Lomamyia Banks
Lomamyia texana (Banks, 1897)	NAM	USA	Utah	15mi E Kanab		Faulkner 1992	A revision of the genus Lomamyia Banks
Lomamyia texana (Banks, 1897)	NAM	USA	Utah	Juab Co: Nephi		Faulkner 1992	A revision of the genus Lomamyia Banks
Lomamyia texana (Banks, 1897)	NAM	USA	Utah	San Juan Co: Natural Bridges Nat'l Mon.		Faulkner 1992	A revision of the genus Lomamyia Banks
Lomamyia texana (Banks, 1897)	NAM	USA	Utah	Pack Creek Campgd. La Sal Mtns.		Faulkner 1992	A revision of the genus Lomamyia Banks
Lomamyia texana (Banks, 1897)	NAM	USA	Utah	Washington Co: E. Fork Virgin		Faulkner 1992	A revision of the genus Lomamyia Banks
Lomamyia texana (Banks, 1897)	NAM	USA	Utah	Leeds Canyon		Faulkner 1992	A revision of the genus Lomamyia Banks
Lomamyia texana (Banks, 1897)	NAM	USA	Utah	Zion Nat'l Pk, Oak Creek		Faulkner 1992	A revision of the genus Lomamyia Banks
Lomamyia texana (Banks, 1897)	NAM	USA	Texas	Brownsville	25°41'N, 97°24'E	McClendon 1906	Notes on the True Neuroptera
Lomamyia texana (Banks, 1897)	NAM	USA	Texas	Central Texas	31°51'N, 99°54'W	(Banks, 1897)	New North American Neuropteroid Insects
Lomamyia trombetensis Penny, 1985	SAM	Brazil	Para	Rio Trombetas, Mineracao, Rio Norte, 22km		Faulkner 1992	A revision of the genus Lomamyia Banks
Lomamyia trombetensis Penny, 1985	SAM	Brazil	Pará	Rio Trombetas, Mineracao, Rio Norte, km22		Penny 1983	Neuroptera of the Amazon Basin. Part 8 Berothidae
Manselliberotha neuropterologorum U. Aspöck & H. Aspöck, 1988	AFR	Namibia		Ameib Ranch, Erongo Mts., Usakos Dist., 1000m	21.48°S, 15.39°E	U. Aspöck & H. Aspöck 1988	Die Subfamilie Cyrenoberothinae
Manselliberotha neuropterologorum U. Aspöck & H. Aspöck, 1988	AFR	Namibia		SW Usakos, 800m	22.01°S, 15.32°E	U. Aspöck & H. Aspöck 1988	Die Subfamilie Cyrenoberothinae
Manselliberotha neuropterologorum U. Aspöck & H. Aspöck, 1988	AFR	Namibia		Helmeringhausen, 1350m	25.53°S, 16.49°E	U. Aspöck & H. Aspöck 1988	Die Subfamilie Cyrenoberothinae
Naizema mendozina (Esben-Petersen, 1912)	SAM	Argentina		Mendoza		Navás 1910	Hemeróbidos nuevos
Naizema mendozina (Esben-Petersen, 1912)	SAM	Argentina		Santa Rosa		Esben-Petersen 1912	A few new Neuroptera Planipennia
Naizema mendozina (Esben-Petersen, 1912)	SAM	Argentina		Potrerillos		Esben-Petersen 1912	A few new Neuroptera Planipennia
Naizema mendozina (Esben-Petersen, 1912)	SAM	Argentina		Mendoza		Esben-Petersen 1912	A few new Neuroptera Planipennia
Naizema patagonica Navás, 1919	SAM			Patagonica, Carm. Col. m.		Navás 1929	Monografía de la Familia de los Berótidos
Nodalla eatoni (McLachlan, 1898)	AFR	Algeria		Biskra		U. Aspöck & H. Aspöck 1998	Intra- und interspezifische Differenzierungen im Genus Nodalla
Nodalla eatoni (McLachlan, 1898)	AFR	Morocco		Moyen-Atlas, Berkine-zogbit, 1100m		U. Aspöck & H. Aspöck 1998	Intra- und interspezifische Differenzierungen im Genus Nodalla
Nodalla eatoni (McLachlan, 1898)	AFR	Algeria		Ain el Hadjadj S Abfall d Plateau du Tademait, 480m	28.01°N, 2.40°E	U. Aspöck & H. Aspöck 1998	Intra- und interspezifische Differenzierungen im Genus Nodalla
Nodalla eatoni (McLachlan, 1898)	AFR	Algeria		20km SE Arak, 520m	25.13°N, 3.51°E	U. Aspöck & H. Aspöck 1998	Intra- und interspezifische Differenzierungen im Genus Nodalla
Nodalla eatoni (McLachlan, 1898)	AFR	Algeria		SE Sidi Moulay Lahsene, 850m	24.40°N, 4.41°E	U. Aspöck & H. Aspöck 1998	Intra- und interspezifische Differenzierungen im Genus Nodalla
Nodalla eatoni (McLachlan, 1898)	AFR	Algeria		Hoggar, N Tit 50km N Tamanrasset, 1000m	23.03°N, 5.11°E	U. Aspöck & H. Aspöck 1998	Intra- und interspezifische Differenzierungen im Genus Nodalla
Nodalla eatoni (McLachlan, 1898)	AFR	Algeria		Hoggar, Gueltas Imeloulaouene, 16km NE Tamanrasset, 1400m	22.53°N, 5.38°E	U. Aspöck & H. Aspöck 1998	Intra- und interspezifische Differenzierungen im Genus Nodalla
Nodalla eatoni (McLachlan, 1898)	AFR	Algeria		Hoggar, Gueltas Issakkaressene, Assekrem-Hirhafok, 1800m	23.25°N, 5.46°E	U. Aspöck & H. Aspöck 1998	Intra- und interspezifische Differenzierungen im Genus Nodalla
Nodalla eatoni (McLachlan, 1898)	AFR	Algeria		Hoggar, Gueltas Tarrenet (E Ideles), 1150m	23.49°N, 5.59°E	U. Aspöck & H. Aspöck 1998	Intra- und interspezifische Differenzierungen im Genus Nodalla
Nodalla eatoni (McLachlan, 1898)	AFR	Algeria		Hoggar, Wadi Timesdelessine, ca. 30km W Hirhafok, 1400m	23.39°N, 5.32°E	U. Aspöck & H. Aspöck 1998	Intra- und interspezifische Differenzierungen im Genus Nodalla
Nodalla eatoni (McLachlan, 1898)	AFR	Algeria		Hoggar, SE Gueltas Temekerest, 1420m	22.47°N, 5.50°E	U. Aspöck & H. Aspöck 1998	Intra- und interspezifische Differenzierungen im Genus Nodalla
Nodalla eatoni (McLachlan, 1898)	AFR	Algeria		18km NW Sebdou		U. Aspöck & H. Aspöck 1998	Intra- und interspezifische Differenzierungen im Genus Nodalla
Nodalla eatoni (McLachlan, 1898)	AFR	Algeria		bei d'Arzew, E Oran		U. Aspöck & H. Aspöck 1998	Intra- und interspezifische Differenzierungen im Genus Nodalla
Nodalla eatoni (McLachlan, 1898)	AFR	Senegal		E Richard Toll, Senegal-Gambia	16°27'N, 15°40'W	U. Aspöck & H. Aspöck 1998	Intra- und interspezifische Differenzierungen im Genus Nodalla
Nodalla eatoni (McLachlan, 1898)	AFR	Nigeria		Gadau	12°N, 10°E	U. Aspöck & H. Aspöck 1998	Intra- und interspezifische Differenzierungen im Genus Nodalla
Nodalla eatoni (McLachlan, 1898)	AFR	Egypt		Wadi Falig, bei Urgada		U. Aspöck & H. Aspöck 1998	Intra- und interspezifische Differenzierungen im Genus Nodalla
Nodalla eatoni (McLachlan, 1898)	AFR	Sudan	Northern Province	Hudeiba, 380m, Wüstenrand, Nilufer		U. Aspöck & H. Aspöck 1998	Intra- und interspezifische Differenzierungen im Genus Nodalla
Nodalla eatoni (McLachlan, 1898)	AFR	Sudan	Kassala Province	Port Sudan		U. Aspöck & H. Aspöck 1998	Intra- und interspezifische Differenzierungen im Genus Nodalla
Nodalla eatoni (McLachlan, 1898)	ASI	Israel		Kjan Rupim		U. Aspöck & H. Aspöck 1998	Intra- und interspezifische Differenzierungen im Genus Nodalla
Nodalla eatoni (McLachlan, 1898)	ASI	Israel		N Paran		U. Aspöck & H. Aspöck 1998	Intra- und interspezifische Differenzierungen im Genus Nodalla
Nodalla eatoni (McLachlan, 1898)	ASI	Israel		Sedom		U. Aspöck & H. Aspöck 1998	Intra- und interspezifische Differenzierungen im Genus Nodalla
Nodalla eatoni (McLachlan, 1898)	ASI	Israel		135km N Eilat Iddan	30°47', 35°17'	U. Aspöck & H. Aspöck 1998	Intra- und interspezifische Differenzierungen im Genus Nodalla
Nodalla eatoni (McLachlan, 1898)	AFR	Saudi Arabia		Bunaiman 12m N of Jedda		U. Aspöck & H. Aspöck 1998	Intra- und interspezifische Differenzierungen im Genus Nodalla
Nodalla eatoni (McLachlan, 1898)	AFR	Saudi Arabia		Asir Bisha		U. Aspöck & H. Aspöck 1998	Intra- und interspezifische Differenzierungen im Genus Nodalla
Nodalla eatoni (McLachlan, 1898)	AFR	Saudi Arabia		Asir Sabya		U. Aspöck & H. Aspöck 1998	Intra- und interspezifische Differenzierungen im Genus Nodalla
Nodalla eatoni (McLachlan, 1898)	AFR	Saudi Arabia		SW-Arabien, Wadi Maraba, 142km n Jizan, 350m		U. Aspöck & H. Aspöck 1998	Intra- und interspezifische Differenzierungen im Genus Nodalla
Nodalla eatoni (McLachlan, 1898)	AFR	Saudi Arabia		SW-Arabien, Asirgebirge, 1150m, Wadi Turabah, 145km s Taif		U. Aspöck & H. Aspöck 1998	Intra- und interspezifische Differenzierungen im Genus Nodalla
Nodalla eatoni (McLachlan, 1898)	AFR	Saudi Arabia		Turabah (Wells), 1200m		U. Aspöck & H. Aspöck 1998	Intra- und interspezifische Differenzierungen im Genus Nodalla
Nodalla eatoni (McLachlan, 1898)	AFR	Saudi Arabia		Kushm Dibi		U. Aspöck & H. Aspöck 1998	Intra- und interspezifische Differenzierungen im Genus Nodalla
Nodalla eatoni (McLachlan, 1898)	AFR	Yemen	Prov. Abyan	50km ne Aden Wadi Bana, 5km nnw Zinjibar, 80m	13°09'N, 45°19'E	U. Aspöck & H. Aspöck 1998	Intra- und interspezifische Differenzierungen im Genus Nodalla
Nodalla eatoni (McLachlan, 1898)	AFR	Oman		near Bandar al Jissah, 100m	23.33°N, 58.39°E	U. Aspöck & H. Aspöck 1998	Intra- und interspezifische Differenzierungen im Genus Nodalla
Nodalla eatoni (McLachlan, 1898)	AFR	Oman		SE Muscat, near Bandar Jissah	23.33°N, 58.39°E	U. Aspöck & H. Aspöck 1998	Intra- und interspezifische Differenzierungen im Genus Nodalla
Nodalla eatoni (McLachlan, 1898)	AFR	Oman		Wadi Fayjah	23.29°, 58.03°	U. Aspöck & H. Aspöck 1998	Intra- und interspezifische Differenzierungen im Genus Nodalla
Nodalla eatoni (McLachlan, 1898)	AFR	Oman		near Banshar		U. Aspöck & H. Aspöck 1998	Intra- und interspezifische Differenzierungen im Genus Nodalla
Nodalla eatoni (McLachlan, 1898)	AFR	Oman		W Al Sib, 10m	23°41'N, 58°10'E	U. Aspöck & H. Aspöck 1998	Intra- und interspezifische Differenzierungen im Genus Nodalla
Nodalla eatoni (McLachlan, 1898)	AFR	Algeria		Biskra		U. Aspöck & H. Aspöck 1984	Zur Kenntnis des Genus Sphaeroberotha
Nodalla eatoni (McLachlan, 1898)	AFR	Morocco		Haut Atlas, über Tachguelte (S Tizi-n-Test), 1150m	30.45°N, 8.20°W	U. Aspöck & H. Aspöck 1984	Zur Kenntnis des Genus Sphaeroberotha
Nodalla eatoni (McLachlan, 1898)	AFR	Morocco		10km N Midelt, 1500m	32.41°N, 4.49°W	U. Aspöck & H. Aspöck 1984	Zur Kenntnis des Genus Sphaeroberotha
Nodalla eatoni (McLachlan, 1898)	AFR	Algeria	Algier			Krüger 1922	Berothidae. Beiträge zu einer Monographie
Nodalla eatoni (McLachlan, 1898)	AFR	Algeria		Tinmel G. Atlas (Goundafa)	30°58'N, 8°13'W	Navás 1929	Monografía de la Familia de los Berótidos
Nodalla eatoni (McLachlan, 1898)	AFR	Algeria		Biskra		Navás 1929	Monografía de la Familia de los Berótidos
Nodalla eatoni (McLachlan, 1898)	AFR	Morocco		Midelt, 1500m	32°40'N, 4°48'W	Monserrat 2006	Nuevos datos sobre algunas especies...
Nodalla gallagheri U. Aspöck & H. Aspöck, 1998	AFR	Oman		Wahiba Sands bei Minitirib, 280m	22.21°N, 58.51°E	U. Aspöck & H. Aspöck 1998	Intra- und interspezifische Differenzierungen im Genus Nodalla
Nodalla geyri (Esben-Petersen, 1920)	AFR	Algeria		Sidi Aoun, N. El Qued, 100m	33.31°N, 6.59°E	U. Aspöck & H. Aspöck 1998	Intra- und interspezifische Differenzierungen im Genus Nodalla
Nodalla geyri (Esben-Petersen, 1920)	AFR	Algeria		Oued M'Zab, 12km SE Zelfana, 250m	32.40°N, 4.12°E	U. Aspöck & H. Aspöck 1998	Intra- und interspezifische Differenzierungen im Genus Nodalla
Nodalla geyri (Esben-Petersen, 1920)	AFR	Algeria		Ain Taiba		U. Aspöck & H. Aspöck 1998	Intra- und interspezifische Differenzierungen im Genus Nodalla
Nodalla geyri (Esben-Petersen, 1920)	AFR	Algeria		Hoggar, N Tit 50km N Tamanrasset, 1000m	23.03°N, 5.11°E	U. Aspöck & H. Aspöck 1998	Intra- und interspezifische Differenzierungen im Genus Nodalla
Nodalla geyri (Esben-Petersen, 1920)	AFR	Algeria		Hoggar, Wadi Telouhet, ESE Ideles, 1150m	23.51°N, 6.05°E	U. Aspöck & H. Aspöck 1998	Intra- und interspezifische Differenzierungen im Genus Nodalla
Nodalla geyri (Esben-Petersen, 1920)	AFR	Tunisia		Tunisie Nefta		U. Aspöck & H. Aspöck 1998	Intra- und interspezifische Differenzierungen im Genus Nodalla
Nodalla geyri (Esben-Petersen, 1920)	AFR	Tunisia		Nefta		U. Aspöck & H. Aspöck 1984	Zur Kenntnis des Genus Sphaeroberotha
Nodalla geyri (Esben-Petersen, 1920)	AFR	Tunisia		S-Tunesien, Umg. Douz		U. Aspöck & H. Aspöck 1984	Zur Kenntnis des Genus Sphaeroberotha
Nodalla geyri (Esben-Petersen, 1920)	AFR	Tunisia		Nefta		Navás 1929	Monografía de la Familia de los Berótidos
Nodalla geyri (Esben-Petersen, 1920)	AFR	Algeria		Sahara argelino, Ain Taiba		Navás 1929	Monografía de la Familia de los Berótidos
Nodalla geyri (Esben-Petersen, 1920)	AFR	Tunisia		Nefta	33°52'N, 7°52'E	MacLeod 1967	Studies on the Systematics of the Berotidae
Nodalla hackeri U. Aspöck & H. Aspöck, 1998	AFR	Jemen		25km nne Al Mukalla, Al Ain 20 km nnw Ar Rayyan, 150m	14°46'N, 49°18'E	U. Aspöck & H. Aspöck 1998	Intra- und interspezifische Differenzierungen im Genus Nodalla
Nodalla lineata Navás, 1936	AFR	Kenia		N-Kenia, Lokitang = Lokitaung		U. Aspöck & H. Aspöck 1998	Intra- und interspezifische Differenzierungen im Genus Nodalla
Nodalla lineata Navás, 1936	AFR	Kenya		N-Kenia, Lokitang = Lokitaung, Turkana nord, 750m		U. Aspöck & H. Aspöck 1984	Zur Kenntnis des Genus Sphaeroberotha
Nodalla lineata Navás, 1936	AFR	Ethiopia		merid Bourié bord de la riv. Omo, 600m		U. Aspöck & H. Aspöck 1984	Zur Kenntnis des Genus Sphaeroberotha
Nodalla lineata Navás, 1936	AFR	Kenya		Turkana nord. st. 24, 750m		Navás 1936	Neuroptera, Embioptera, Plecoptera, Ephemeroptera et Trichoptera
Nodalla lineata Navás, 1936	AFR	Ethiopia		Éthiopie méridionale: Bourillé, bords de la rivière Omo, st. 28, 600m		Navás 1936	Neuroptera, Embioptera, Plecoptera, Ephemeroptera et Trichoptera
Nodalla lineata Navás, 1936	AFR	Ethiopia	Ethiopie Mérid.	Bourié, Bord de la Riv. Omo, 600m		Monserrat 2006	Nuevos datos sobre algunas especies...
Nodalla remane (U. Aspöck & H. Aspöck, 1984)	ASI	Iraq		Abu-Graib		U. Aspöck & H. Aspöck 1998	Intra- und interspezifische Differenzierungen im Genus Nodalla
Nodalla remane (U. Aspöck & H. Aspöck, 1984)	ASI	Iraq		Abu Ghraib		U. Aspöck & H. Aspöck 1984	Zur Kenntnis des Genus Sphaeroberotha
Nodalla ressli (U. Aspöck & H. Aspöck, 1984)	ASI	Iran		Makran südöstl. Nahu, 1300m		U. Aspöck & H. Aspöck 1998	Intra- und interspezifische Differenzierungen im Genus Nodalla
Nodalla ressli (U. Aspöck & H. Aspöck, 1984)	ASI	Iran		S-Iran, Umg. Bandar-Abbas	28°N, 56°E	U. Aspöck & H. Aspöck 1984	Zur Kenntnis des Genus Sphaeroberotha
Nodalla ressli (U. Aspöck & H. Aspöck, 1984)	ASI	Iran		S-Iran, 100km N Bandarabbas		U. Aspöck & H. Aspöck 1984	Zur Kenntnis des Genus Sphaeroberotha
Nodalla ressli (U. Aspöck & H. Aspöck, 1984)	ASI	Iran		S-Iran, 43km N Bandar Abbas, Abad Geno		U. Aspöck & H. Aspöck 1984	Zur Kenntnis des Genus Sphaeroberotha
Nodalla ressli (U. Aspöck & H. Aspöck, 1984)	ASI	Iran		30km S Isfahan, 1700m		U. Aspöck & H. Aspöck 1984	Zur Kenntnis des Genus Sphaeroberotha
Nodalla saharica (Esben-Petersen, 1920)	AFR	Algeria		Hoggar, Gueltas Imeloulaouene, 16km NE Tamanrasset, 1400m	22.53°N, 5.38°E	U. Aspöck & H. Aspöck 1998	Intra- und interspezifische Differenzierungen im Genus Nodalla
Nodalla saharica (Esben-Petersen, 1920)	AFR	Morocco		Gr. Atlas Goundafa 1200m		U. Aspöck & H. Aspöck 1998	Intra- und interspezifische Differenzierungen im Genus Nodalla
Nodalla saharica (Esben-Petersen, 1920)	AFR	Morocco		Haut Atlas, 10km N Ksar-es-Souk, 1400m	32.02°N, 4.25°W	U. Aspöck & H. Aspöck 1998	Intra- und interspezifische Differenzierungen im Genus Nodalla
Nodalla saharica (Esben-Petersen, 1920)	AFR	Morocco		Haut Atlas, über Tachguelte (S Tizi-n-Test), 1150m	30.45°N, 8.20°W	U. Aspöck & H. Aspöck 1998	Intra- und interspezifische Differenzierungen im Genus Nodalla
Nodalla saharica (Esben-Petersen, 1920)	AFR	Morocco		Haut Atlas, NE Tiouine (S Amerzgane), 1400m	30.75°N, 7.09°W	U. Aspöck & H. Aspöck 1998	Intra- und interspezifische Differenzierungen im Genus Nodalla
Nodalla saharica (Esben-Petersen, 1920)	AFR	Morocco		10km N Midelt, 1500m	32.41°N, 4.49°W	U. Aspöck & H. Aspöck 1998	Intra- und interspezifische Differenzierungen im Genus Nodalla
Nodalla saharica (Esben-Petersen, 1920)	AFR	Morocco		Gorges du Torra Marruecos		U. Aspöck & H. Aspöck 1998	Intra- und interspezifische Differenzierungen im Genus Nodalla
Nodalla saharica (Esben-Petersen, 1920)	AFR	Algeria		Hoggar, N Tit 50km N Tamanrasset, 1000m	23.03°N, 5.11°E	U. Aspöck & H. Aspöck 1998	Intra- und interspezifische Differenzierungen im Genus Nodalla
Nodalla saharica (Esben-Petersen, 1920)	AFR	Algeria		Hoggar, Gueltas Issakkaressene, Assekrem-Hirhafok, 1800m	23.25°N, 5.46°E	U. Aspöck & H. Aspöck 1998	Intra- und interspezifische Differenzierungen im Genus Nodalla
Nodalla saharica (Esben-Petersen, 1920)	AFR	Algeria		Hoggar, Gueltas Tarrenet (E Ideles), 1150m	23.49°N, 5.59°E	U. Aspöck & H. Aspöck 1998	Intra- und interspezifische Differenzierungen im Genus Nodalla
Nodalla saharica (Esben-Petersen, 1920)	AFR	Algeria		Hoggar, SE Gueltas Temekerest, 1420m	22.47°N, 5.50°E	U. Aspöck & H. Aspöck 1998	Intra- und interspezifische Differenzierungen im Genus Nodalla
Nodalla saharica (Esben-Petersen, 1920)	AFR	Algeria		3km Berriane (N Ghardaia), 650m	32.57°N, 3.44°E	U. Aspöck & H. Aspöck 1998	Intra- und interspezifische Differenzierungen im Genus Nodalla
Nodalla saharica (Esben-Petersen, 1920)	AFR	Egypt		Wadi Abou Guffan		U. Aspöck & H. Aspöck 1998	Intra- und interspezifische Differenzierungen im Genus Nodalla
Nodalla saharica (Esben-Petersen, 1920)	AFR	Egypt		Sainte Catherine Sud Sinai		U. Aspöck & H. Aspöck 1998	Intra- und interspezifische Differenzierungen im Genus Nodalla
Nodalla saharica (Esben-Petersen, 1920)	AFR	Sudan		Kororak		U. Aspöck & H. Aspöck 1998	Intra- und interspezifische Differenzierungen im Genus Nodalla
Nodalla saharica (Esben-Petersen, 1920)	AFR	Sudan	Northern Province	Hudeiba, 380m, Wüstenrand, Nilufer		U. Aspöck & H. Aspöck 1998	Intra- und interspezifische Differenzierungen im Genus Nodalla
Nodalla saharica (Esben-Petersen, 1920)	AFR	Sudan		Hudeiba		U. Aspöck & H. Aspöck 1998	Intra- und interspezifische Differenzierungen im Genus Nodalla
Nodalla saharica (Esben-Petersen, 1920)	AFR	Sudan	Kassala Province	Port Sudan		U. Aspöck & H. Aspöck 1998	Intra- und interspezifische Differenzierungen im Genus Nodalla
Nodalla saharica (Esben-Petersen, 1920)	AFR	Sudan	Kassala Province	Red-Sea-Hills, Erkowit-Massiv, 1100-1300m		U. Aspöck & H. Aspöck 1998	Intra- und interspezifische Differenzierungen im Genus Nodalla
Nodalla saharica (Esben-Petersen, 1920)	AFR	Senegal		N. Richard-Toll		U. Aspöck & H. Aspöck 1998	Intra- und interspezifische Differenzierungen im Genus Nodalla
Nodalla saharica (Esben-Petersen, 1920)	AFR	Senegal		E Richard Toll, Senegal-Gambia	16°27'N, 15°40'W	U. Aspöck & H. Aspöck 1998	Intra- und interspezifische Differenzierungen im Genus Nodalla
Nodalla saharica (Esben-Petersen, 1920)	AFR	Niger		120km S Ao lit Niger		U. Aspöck & H. Aspöck 1998	Intra- und interspezifische Differenzierungen im Genus Nodalla
Nodalla saharica (Esben-Petersen, 1920)	AFR	Niger		Abuja		U. Aspöck & H. Aspöck 1998	Intra- und interspezifische Differenzierungen im Genus Nodalla
Nodalla saharica (Esben-Petersen, 1920)	ASI	Israel		W Shreg T Hizkrahoo		U. Aspöck & H. Aspöck 1998	Intra- und interspezifische Differenzierungen im Genus Nodalla
Nodalla saharica (Esben-Petersen, 1920)	ASI	Israel		Jud Desert, En Gedi, 200m	31.27N, 35.23E	U. Aspöck & H. Aspöck 1998	Intra- und interspezifische Differenzierungen im Genus Nodalla
Nodalla saharica (Esben-Petersen, 1920)	ASI	Israel		Machtesh Ramon		U. Aspöck & H. Aspöck 1998	Intra- und interspezifische Differenzierungen im Genus Nodalla
Nodalla saharica (Esben-Petersen, 1920)	ASI	Israel		Shivta		U. Aspöck & H. Aspöck 1998	Intra- und interspezifische Differenzierungen im Genus Nodalla
Nodalla saharica (Esben-Petersen, 1920)	ASI	Israel		Sinai W. Fir an		U. Aspöck & H. Aspöck 1998	Intra- und interspezifische Differenzierungen im Genus Nodalla
Nodalla saharica (Esben-Petersen, 1920)	ASI	Israel		Susita		U. Aspöck & H. Aspöck 1998	Intra- und interspezifische Differenzierungen im Genus Nodalla
Nodalla saharica (Esben-Petersen, 1920)	ASI	Israel		Sedom		U. Aspöck & H. Aspöck 1998	Intra- und interspezifische Differenzierungen im Genus Nodalla
Nodalla saharica (Esben-Petersen, 1920)	ASI	Israel		135km N Eilat Iddan		U. Aspöck & H. Aspöck 1998	Intra- und interspezifische Differenzierungen im Genus Nodalla
Nodalla saharica (Esben-Petersen, 1920)	AFR	Saudi Arabia		Buraiman 12 m. N. of Jedda		U. Aspöck & H. Aspöck 1998	Intra- und interspezifische Differenzierungen im Genus Nodalla
Nodalla saharica (Esben-Petersen, 1920)	AFR	Saudi Arabia		Hadramaut Er Riyedael Kathiri		U. Aspöck & H. Aspöck 1998	Intra- und interspezifische Differenzierungen im Genus Nodalla
Nodalla saharica (Esben-Petersen, 1920)	AFR	Saudi Arabia		Riyad Arabia		U. Aspöck & H. Aspöck 1998	Intra- und interspezifische Differenzierungen im Genus Nodalla
Nodalla saharica (Esben-Petersen, 1920)	AFR	Saudi Arabia		Bahara		U. Aspöck & H. Aspöck 1998	Intra- und interspezifische Differenzierungen im Genus Nodalla
Nodalla saharica (Esben-Petersen, 1920)	AFR	Saudi Arabia		Wadi Shuqub, 1390m		U. Aspöck & H. Aspöck 1998	Intra- und interspezifische Differenzierungen im Genus Nodalla
Nodalla saharica (Esben-Petersen, 1920)	AFR	Saudi Arabia		Rumah		U. Aspöck & H. Aspöck 1998	Intra- und interspezifische Differenzierungen im Genus Nodalla
Nodalla saharica (Esben-Petersen, 1920)	AFR	Saudi Arabia		Abha-Githan km 53, Wadi Ad Dilla, 300m		U. Aspöck & H. Aspöck 1998	Intra- und interspezifische Differenzierungen im Genus Nodalla
Nodalla saharica (Esben-Petersen, 1920)	AFR	Saudi Arabia		Wadi Turabah Camp 1, 1450m		U. Aspöck & H. Aspöck 1998	Intra- und interspezifische Differenzierungen im Genus Nodalla
Nodalla saharica (Esben-Petersen, 1920)	AFR	Saudi Arabia		Hilwah		U. Aspöck & H. Aspöck 1998	Intra- und interspezifische Differenzierungen im Genus Nodalla
Nodalla saharica (Esben-Petersen, 1920)	AFR	Saudi Arabia		Maraba		U. Aspöck & H. Aspöck 1998	Intra- und interspezifische Differenzierungen im Genus Nodalla
Nodalla saharica (Esben-Petersen, 1920)	AFR	Saudi Arabia		Wadi Awsat		U. Aspöck & H. Aspöck 1998	Intra- und interspezifische Differenzierungen im Genus Nodalla
Nodalla saharica (Esben-Petersen, 1920)	AFR	Saudi Arabia		Wadi Hanifa		U. Aspöck & H. Aspöck 1998	Intra- und interspezifische Differenzierungen im Genus Nodalla
Nodalla saharica (Esben-Petersen, 1920)	AFR	Saudi Arabia		Wadi Khumra		U. Aspöck & H. Aspöck 1998	Intra- und interspezifische Differenzierungen im Genus Nodalla
Nodalla saharica (Esben-Petersen, 1920)	AFR	Saudi Arabia		Hail		U. Aspöck & H. Aspöck 1998	Intra- und interspezifische Differenzierungen im Genus Nodalla
Nodalla saharica (Esben-Petersen, 1920)	AFR	Saudi Arabia		Wadi Hureimala		U. Aspöck & H. Aspöck 1998	Intra- und interspezifische Differenzierungen im Genus Nodalla
Nodalla saharica (Esben-Petersen, 1920)	AFR	Saudi Arabia		Wadi Al Ammariya		U. Aspöck & H. Aspöck 1998	Intra- und interspezifische Differenzierungen im Genus Nodalla
Nodalla saharica (Esben-Petersen, 1920)	AFR	Saudi Arabia		Jebel Thamamah		U. Aspöck & H. Aspöck 1998	Intra- und interspezifische Differenzierungen im Genus Nodalla
Nodalla saharica (Esben-Petersen, 1920)	AFR	Saudi Arabia		Hieth 40km S Riyadh		U. Aspöck & H. Aspöck 1998	Intra- und interspezifische Differenzierungen im Genus Nodalla
Nodalla saharica (Esben-Petersen, 1920)	AFR	Saudi Arabia		Artawiya		U. Aspöck & H. Aspöck 1998	Intra- und interspezifische Differenzierungen im Genus Nodalla
Nodalla saharica (Esben-Petersen, 1920)	AFR	Saudi Arabia		Wadi Juraisi		U. Aspöck & H. Aspöck 1998	Intra- und interspezifische Differenzierungen im Genus Nodalla
Nodalla saharica (Esben-Petersen, 1920)	AFR	Saudi Arabia		Jal Khartam		U. Aspöck & H. Aspöck 1998	Intra- und interspezifische Differenzierungen im Genus Nodalla
Nodalla saharica (Esben-Petersen, 1920)	AFR	Saudi Arabia		Kushm Dibi		U. Aspöck & H. Aspöck 1998	Intra- und interspezifische Differenzierungen im Genus Nodalla
Nodalla saharica (Esben-Petersen, 1920)	AFR	Saudi Arabia		Asir, 1120m As Sud		U. Aspöck & H. Aspöck 1998	Intra- und interspezifische Differenzierungen im Genus Nodalla
Nodalla saharica (Esben-Petersen, 1920)	AFR	Saudi Arabia		Jebel an Nir, 990m		U. Aspöck & H. Aspöck 1998	Intra- und interspezifische Differenzierungen im Genus Nodalla
Nodalla saharica (Esben-Petersen, 1920)	AFR	Yemen	7 San'a'	60km sw San'a', Makaban Naqil Manaqhah (Westside)	15°04'N, 43°49'E	U. Aspöck & H. Aspöck 1998	Intra- und interspezifische Differenzierungen im Genus Nodalla
Nodalla saharica (Esben-Petersen, 1920)	AFR	Yemen	9 Al-Mahwit	30km ne Bajil, 5km nne Khamis Bani Sa'd, 750m	15°11'N, 43°32'E	U. Aspöck & H. Aspöck 1998	Intra- und interspezifische Differenzierungen im Genus Nodalla
Nodalla saharica (Esben-Petersen, 1920)	AFR	Yemen		25km nne Al Mukalla, Al Ain 20 km nnw Ar Rayyan, 150m	14°46'N, 49°18'E	U. Aspöck & H. Aspöck 1998	Intra- und interspezifische Differenzierungen im Genus Nodalla
Nodalla saharica (Esben-Petersen, 1920)	AFR	Yemen	22 Abyan	50km ne Aden Wadi Bana, 5km nnw Zinjibar, 80m	13°09'N, 45°19'E	U. Aspöck & H. Aspöck 1998	Intra- und interspezifische Differenzierungen im Genus Nodalla
Nodalla saharica (Esben-Petersen, 1920)	AFR	Yemen	27 Ta'izz	15km se Ta'izz, 1350m	13°28'N, 44°09'E	U. Aspöck & H. Aspöck 1998	Intra- und interspezifische Differenzierungen im Genus Nodalla
Nodalla saharica (Esben-Petersen, 1920)	AFR	Oman		SE Muscat Wadi Mayh, 200m	23°27'N, 58°35'E	U. Aspöck & H. Aspöck 1998	Intra- und interspezifische Differenzierungen im Genus Nodalla
Nodalla saharica (Esben-Petersen, 1920)	AFR	Oman		N Sama il 400m, Qaylah	23°21'N, 58°03'E	U. Aspöck & H. Aspöck 1998	Intra- und interspezifische Differenzierungen im Genus Nodalla
Nodalla saharica (Esben-Petersen, 1920)	AFR	Oman		Fanjah Wadi Fanjah	23°27'N, 58°08'E	U. Aspöck & H. Aspöck 1998	Intra- und interspezifische Differenzierungen im Genus Nodalla
Nodalla saharica (Esben-Petersen, 1920)	AFR	Oman		near Bandar al Jissah, 100m	23.33°N, 58.39°E	U. Aspöck & H. Aspöck 1998	Intra- und interspezifische Differenzierungen im Genus Nodalla
Nodalla saharica (Esben-Petersen, 1920)	AFR	Oman		SE Muscat, near Bandar Jissah	23.33°N, 58.39°E	U. Aspöck & H. Aspöck 1998	Intra- und interspezifische Differenzierungen im Genus Nodalla
Nodalla saharica (Esben-Petersen, 1920)	AFR	Oman		Bandar Jissah	23.33°N, 58.38°E	U. Aspöck & H. Aspöck 1998	Intra- und interspezifische Differenzierungen im Genus Nodalla
Nodalla saharica (Esben-Petersen, 1920)	AFR	Oman		Jawbah	20.55°N, 58.15°E	U. Aspöck & H. Aspöck 1998	Intra- und interspezifische Differenzierungen im Genus Nodalla
Nodalla saharica (Esben-Petersen, 1920)	AFR	Oman		Sayq, 310m Wadi Bani Khalid	22°30'N / 59°08'E	U. Aspöck & H. Aspöck 1998	Intra- und interspezifische Differenzierungen im Genus Nodalla
Nodalla saharica (Esben-Petersen, 1920)	AFR	Oman		Quara't al Masalha near Al Hamra, 580m	23°05N / 57°18'E	U. Aspöck & H. Aspöck 1998	Intra- und interspezifische Differenzierungen im Genus Nodalla
Nodalla saharica (Esben-Petersen, 1920)	ASI	Iraq	centr. Prov. Ramadi	Ramadi		U. Aspöck & H. Aspöck 1998	Intra- und interspezifische Differenzierungen im Genus Nodalla
Nodalla saharica (Esben-Petersen, 1920)	ASI	Iraq	centr. Prov. Baghdad	Abu Ghraib		U. Aspöck & H. Aspöck 1998	Intra- und interspezifische Differenzierungen im Genus Nodalla
Nodalla saharica (Esben-Petersen, 1920)	ASI	Iraq	Belutschistan	Jranshar, 800m		U. Aspöck & H. Aspöck 1998	Intra- und interspezifische Differenzierungen im Genus Nodalla
Nodalla saharica (Esben-Petersen, 1920)	ASI	Iraq		26km S Minab		U. Aspöck & H. Aspöck 1998	Intra- und interspezifische Differenzierungen im Genus Nodalla
Nodalla saharica (Esben-Petersen, 1920)	ASI	Iraq		43km N Bandarabbass, Abad Geno Therme		U. Aspöck & H. Aspöck 1998	Intra- und interspezifische Differenzierungen im Genus Nodalla
Nodalla saharica (Esben-Petersen, 1920)	ASI	Iraq		30km östl. Bandarabbass		U. Aspöck & H. Aspöck 1998	Intra- und interspezifische Differenzierungen im Genus Nodalla
Nodalla saharica (Esben-Petersen, 1920)	ASI	Iraq		S-Iran, 15km NO v. Bandar-Abbas		U. Aspöck & H. Aspöck 1998	Intra- und interspezifische Differenzierungen im Genus Nodalla
Nodalla saharica (Esben-Petersen, 1920)	ASI	Iraq		S-Iran, 22km nördl. Bandar-Abbas		U. Aspöck & H. Aspöck 1998	Intra- und interspezifische Differenzierungen im Genus Nodalla
Nodalla saharica (Esben-Petersen, 1920)	ASI	Iraq		S-Iran, Umg. Bandar-Abbas	28°N, 56°E	U. Aspöck & H. Aspöck 1998	Intra- und interspezifische Differenzierungen im Genus Nodalla
Nodalla saharica (Esben-Petersen, 1920)	ASI	Iraq		S-Iran, 100km N Bandarabbas		U. Aspöck & H. Aspöck 1998	Intra- und interspezifische Differenzierungen im Genus Nodalla
Nodalla saharica (Esben-Petersen, 1920)	ASI	Afghanistan		SO-Afghanistan, 80km NO von Kandahar		U. Aspöck & H. Aspöck 1998	Intra- und interspezifische Differenzierungen im Genus Nodalla
Nodalla saharica (Esben-Petersen, 1920)	AFR	Sudan		Kororak (Kordofan)		U. Aspöck & H. Aspöck 1984	Zur Kenntnis des Genus Sphaeroberotha
Nodalla saharica (Esben-Petersen, 1920)	AFR	Egypt		Wadi Guffan		Navás 1929	Monografía de la Familia de los Berótidos
Nodalla saharica (Esben-Petersen, 1920)	AFR	Egypt	Südsinai	bei Wadi Um Rayig		Navás 1929	Monografía de la Familia de los Berótidos
Nodalla saharica (Esben-Petersen, 1920)	AFR	Algeria		Oued Amra = Hassi Khelifa	33°35'N, 7°01'E	Navás 1929	Monografía de la Familia de los Berótidos
Nodalla saharica (Esben-Petersen, 1920)	AFR	Egypt		Wadi Guffan		Navás 1926	Névroptères d'Egypte et de Palestine 3me
Nodalla saharica (Esben-Petersen, 1920)	AFR	Egypt		Umg. Wadi um Rayig (Südsinai)		Navás 1926	Névroptères d'Egypte et de Palestine 3me
Nodalla saharica (Esben-Petersen, 1920)	ASI	Iran		Bandar Khamir, 10m	26°57'N, 55°36'E	Monserrat 2006	Nuevos datos sobre algunas especies...
Nodalla saharica (Esben-Petersen, 1920)	AFR	Morocco		Beni Mellal		Monserrat 2006	Nuevos datos sobre algunas especies...
Nodalla saharica (Esben-Petersen, 1920)	AFR	Morocco		Gorges du Todra, 1420m		Monserrat 2006	Nuevos datos sobre algunas especies...
Nodalla saharica (Esben-Petersen, 1920)	AFR	Sudan		Kororak	10°49'N, 30°11'E	Esben-Petersen 1930	Neuropteren
Nodalla saharica (Esben-Petersen, 1920)	AFR	Libya		Uadi Masauda	28°10'N, 14°27'E	Esben-Petersen 1936	Neuroptera
Nodalla sp.	ASI	Sri Lanka		Mannar Island, 10ft		Hynd 1992	New items in neuropteran distribution
Nodalla steffani U. Aspöck & H. Aspöck, 1998	AFR	Jemen	Prov. Abyan	50km ne Aden Wadi Bana, 5km nnw Zinjibar, 80m	13°09'N, 45°19'E	U. Aspöck & H. Aspöck 1998	Intra- und interspezifische Differenzierungen im Genus Nodalla
Nodalla striatella Navás, 1936	AFR	Kenya		Turkana Partie Sud. Sables, 800-1000m		U. Aspöck & H. Aspöck 1998	Intra- und interspezifische Differenzierungen im Genus Nodalla
Nodalla striatella Navás, 1936	AFR	Kenya		Turkana, partie sud, sables, st. 22, 800-1.000m		Navás 1936	Neuroptera, Embioptera, Plecoptera, Ephemeroptera et Trichoptera
Nodalla striatella Navás, 1936	AFR	Kenya	Turkana County		3°24'N, 35°12'E	Navás 1936	Neuroptera, Embioptera, Plecoptera, Ephemeroptera et Trichoptera
Nodalla vartianella (U. Aspöck & H. Aspöck, 1984)	ASI	Afghanistan		E-Afghanistan, Nuristan: Bashgal, 18km E Kamu, 1500m		U. Aspöck & H. Aspöck 1998	Intra- und interspezifische Differenzierungen im Genus Nodalla
Nodalla vartianella (U. Aspöck & H. Aspöck, 1984)	ASI	Afghanistan		NO-Afghanistan, Petsch-Tal, O v. Schari Sarai, 1100m		U. Aspöck & H. Aspöck 1984	Zur Kenntnis des Genus Sphaeroberotha
Nodalla vartianella (U. Aspöck & H. Aspöck, 1984)	ASI	Afghanistan		25km N v. Barikot, 1800m, Nuristan		U. Aspöck & H. Aspöck 1984	Zur Kenntnis des Genus Sphaeroberotha
Nosybus hirsutipennis U. Aspöck & H. Aspöck, 1983	AFR	Tanzania	Mpande Distr.	Sibweza, 1100m	6°27'S, 29°55'E	U. Aspöck & H. Aspöck 1983	Das Genus Nosybus
Nosybus hirsutipennis U. Aspöck & H. Aspöck, 1983	AFR	Mozambique		Vallée du Revoué env. d'Andrada		U. Aspöck & H. Aspöck 1983	Das Genus Nosybus
Nosybus minutus Tjeder, 1959	AFR					U. Aspöck & H. Aspöck 1983	Das Genus Nosybus
Nosybus minutus Tjeder, 1959	AFR	Namibia		Andoni in Ovamboland	18°16'S, 16°33'E	Tjeder 1959	The Lace-wings of Southern Africa, Familiy Berothidae
Nosybus navasi Banks, 1918	AFR	Ghana		Gold Coast Aburi		U. Aspöck & H. Aspöck 1983	Das Genus Nosybus
Nosybus navasi Banks, 1918	AFR	Togo		Bismarckburg		U. Aspöck & H. Aspöck 1983	Das Genus Nosybus
Nosybus navasi Banks, 1918	AFR	Nigeria		Zugurma, NW State		U. Aspöck & H. Aspöck 1983	Das Genus Nosybus
Nosybus navasi Banks, 1918	AFR	Nigeria		Ile-Ife, W State		U. Aspöck & H. Aspöck 1983	Das Genus Nosybus
Nosybus navasi Banks, 1918	AFR	Cameroon		20km E Banyo		U. Aspöck & H. Aspöck 1983	Das Genus Nosybus
Nosybus navasi Banks, 1918	AFR	Central African Republic		Bouar		U. Aspöck & H. Aspöck 1983	Das Genus Nosybus
Nosybus navasi Banks, 1918	AFR	Gambia		Bamba Forest about 4km NNW Brikama Road Junction		U. Aspöck & H. Aspöck 1983	Das Genus Nosybus
Nosybus navasi Banks, 1918	AFR	Gambia		Tendaba Camp, Südufer Gambia	15°50'W	U. Aspöck & H. Aspöck 1983	Das Genus Nosybus
Nosybus navasi Banks, 1918	AFR	Togo		Bismarckburg		Krüger 1922	Berothidae. Beiträge zu einer Monographie
Nosybus navasi Banks, 1918	AFR	Democratic Republic of the Congo		Leopoldville	4°23'S, 15°58'E	Tjeder 1959	The Lace-wings of Southern Africa, Familiy Berothidae
Nosybus navasi Banks, 1918	AFR	Gabon		Ogowe, Lambaréné	00°42S, 10°14'E	Tjeder 1959	The Lace-wings of Southern Africa, Familiy Berothidae
Nosybus navasi Banks, 1918	AFR	Democratic Republic of the Congo		Luebo	5°21'S, 21°25'E	Tjeder 1959	The Lace-wings of Southern Africa, Familiy Berothidae
Nosybus navasi Banks, 1918	AFR	Democratic Republic of the Congo		Dongu, Upper Uelle	3°36'N, 28°21'E	Tjeder 1959	The Lace-wings of Southern Africa, Familiy Berothidae
Nosybus navasi Banks, 1918	AFR	Democratic Republic of the Congo		Stanleyville	00°31'N, 25°12'E	Tjeder 1959	The Lace-wings of Southern Africa, Familiy Berothidae
Nosybus navasi Banks, 1918	AFR	Ivory Coast		Adiopodoumé	5°20'N, 4°08'W	Fraser 1952	New species of Neuroptera in the Museum National d'Histoire Naturelle, Paris
Nosybus nobilis Navás, 1910	AFR	Mozambique		Vallée du Revoué env. d'Andrada		U. Aspöck & H. Aspöck 1983	Das Genus Nosybus
Nosybus nobilis Navás, 1910	AFR	Zimbabwe		S Rhodesia, Marandellas		U. Aspöck & H. Aspöck 1983	Das Genus Nosybus
Nosybus nobilis Navás, 1910	AFR	Zimbabwe		Turk Mine, S. Rhodesia		U. Aspöck & H. Aspöck 1983	Das Genus Nosybus
Nosybus nobilis Navás, 1910	AFR	Zimbabwe		Turk Mine, Mutabele'd		U. Aspöck & H. Aspöck 1983	Das Genus Nosybus
Nosybus nobilis Navás, 1910	AFR	Tanzania		Nyassa See, Mbamba-Bai		U. Aspöck & H. Aspöck 1983	Das Genus Nosybus
Nosybus nobilis Navás, 1910	AFR	Tansania		Nyassa-See, Randberge ö. v. Mbamba-Bay		U. Aspöck & H. Aspöck 1983	Das Genus Nosybus
Nosybus nobilis Navás, 1910	AFR	Tansania		Tanganyika-Terr. Massassi, 460m (=Masasi, S-Tansania)		U. Aspöck & H. Aspöck 1983	Das Genus Nosybus
Nosybus nobilis Navás, 1910	AFR	Mozambique		Valle del Revoué, cercanías de Andrada		Navás 1910	Hemeróbidos nuevos
Nosybus nobilis Navás, 1910	AFR	Congo	Bas-Congo	Lemfu		Monserrat 2006	Nuevos datos sobre algunas especies...
Nosybus nobilis Navás, 1910	AFR	Congo	Haut-Uele	Mauda		Monserrat 2006	Nuevos datos sobre algunas especies...
Nosybus nobilis Navás, 1910	AFR	Ivory Coast		Besigerville		Monserrat 2006	Nuevos datos sobre algunas especies...
Nosybus nobilis Navás, 1910	AFR	Mozambique		Vallée du Revoué env. d'Andrada		Monserrat 2006	Nuevos datos sobre algunas especies...
Nosybus nobilis Navás, 1910	AFR	Uganda	Masindi District	Budongo Forest		Monserrat 2006	Nuevos datos sobre algunas especies...
Nosybus nobilis Navás, 1910	AFR	Zimbabwe		Bulawayo	20°08'S, 28°43'E	Tjeder 1959	The Lace-wings of Southern Africa, Familiy Berothidae
Nosybus nobilis Navás, 1910	AFR	Zambia		Lusaka	15°25'S, 28°17'E	Tjeder 1959	The Lace-wings of Southern Africa, Familiy Berothidae
Nosybus nobilis Navás, 1910	AFR	Tanzania		Nyembe-Bulungwa	04°03'S, 32°12'E	Tjeder 1959	The Lace-wings of Southern Africa, Familiy Berothidae
Nosybus nobilis Navás, 1910	AFR	Democratic Republic of the Congo	Katanga	Elisabethville	11°40'S, 27°28'E	Tjeder 1959	The Lace-wings of Southern Africa, Familiy Berothidae
Nosybus nobilis Navás, 1910	AFR	Democratic Republic of the Congo	Katanga	Bukama	9°09'S, 25°49'E	Tjeder 1959	The Lace-wings of Southern Africa, Familiy Berothidae
Nosybus nobilis Navás, 1910	AFR	Democratic Republic of the Congo	Kasai Occidental	Tshikapa	6°25'S, 20°48'E	Navás 1926	Insectes du Congo Belge. Série II.
Nosybus nobilis Navás, 1910	AFR	Democratic Republic of the Congo		Luebo	5°21'S, 21°25'E	Navás 1930	Insectes du Congo Belge. Série IV.
Nosybus nobilis Navás, 1910	AFR	Democratic Republic of the Congo	Ituri	Faradja (Sesenye)	3°44'N, 29°43'E	Navás 1932	Insectes du Congo Belge. Série VII.
Nosybus nobilis Navás, 1910	AFR	Democratic Republic of the Congo	Katanga	Kansenia	9°28'S, 27°06'E	Navás 1932	Insectes du Congo Belge. Série VII.
Nosybus nobilis Navás, 1910	AFR	Democratic Republic of the Congo		Lubutu	0°43'S, 26°34'E	Navás 1933	Insectes du Congo Belge. Série VIII.
Nosybus nobilis Navás, 1910	AFR	Democratic Republic of the Congo	Ituri	Alokoko	1°48'N, 28°58'E	Navás 1933	Insectes du Congo Belge. Série VIII.
Nosybus sp.	AFR	Zaire		Kafa Kumba Congo Belge		U. Aspöck & H. Aspöck 1983	Das Genus Nosybus
Nosybus tjederi U. Aspöck & H. Aspöck, 1983	AFR	Nigeria		Ile-Ife, W State		U. Aspöck & H. Aspöck 1983	Das Genus Nosybus
Nosybus venustus U. Aspöck & H. Aspöck, 1983	AFR	Gabon		Ogooué Lambarené		U. Aspöck & H. Aspöck 1983	Das Genus Nosybus
Nosybus zernyi U. Aspöck & H. Aspöck, 1983	AFR	Tansania		Tanganyika-Terr. Massassi, 460m (=Masasi, S-Tansania)		U. Aspöck & H. Aspöck 1983	Das Genus Nosybus
Nyrma kervillea Navás, 1933	EUR	Turkey	Ost-Anatolien, Prov. Urfa	Karacaday		U. Aspöck 1989	Nyrma kervillea Navás
Nyrma kervillea Navás, 1933	EUR	Turkey	Region de Esmirna			U. Aspöck 1989	Nyrma kervillea Navás
Nyrma kervillea Navás, 1933	EUR	Turkey		bei Esmirna [Izmir]		Navás 1933	De las cazas del Sr. Gadeau de Kerville en el Asia Menor
Nyrma kervillea Navás, 1933	EUR	Turkey	Adiyaman	near Karadut	37°54'N, 38°48'E	Dobosz & Górski	New data on Nyrma kervillea [Poster]
Nyrma kervillea Navás, 1933	EUR	Turkey	Anatolien	Prov. Mus, E Boglan-Paß, 1600m	38.56°N, 41.05°E	U. Aspöck & H. Aspöck 1989	Nyrma kervillea Navás
Nyrma kervillea Navás, 1933	EUR	Turkey		Esmirna		Monserrat 2006	Nuevos datos sobre algunas especies...
Ormiscocerus nitidipennis Blanchard, 1851	SAM	Chile	Region IV	Elqui Prov., Quebrada El Arrayán, 10km S La Villa, 400m	30°04.26'S, 71°00.04'W	Penny & Winterton 2007	Rediscovery of the Unusual Genus Ormiscocerus
Podallea arabica U. Aspöck & H. Aspöck, 1981	AFR	Saudi Arabia		SW-Arabien, Asirgebirge, 2000m Wadi Morah, 81km s Biljurshi		U. Aspöck & H. Aspöck 1981	Das Genus Podallea
Podallea arabica U. Aspöck & H. Aspöck, 1981	AFR	Saudi Arabia		SW-Arabien, Asirgebirge, 2350m, 5km s. Namas		U. Aspöck & H. Aspöck 1981	Das Genus Podallea
Podallea arabica U. Aspöck & H. Aspöck, 1981	AFR	Saudi Arabia		Al Alayyah 79, 1950m		U. Aspöck & H. Aspöck 1981	Das Genus Podallea
Podallea asquamata U. Aspöck & H. Aspöck, 1996	AFR	Angola		Chianga		U. Aspöck & H. Aspöck 1996	Revision des Genus Podallea
Podallea asquamata U. Aspöck & H. Aspöck, 1996	AFR	Zaire		Elisabethville		U. Aspöck & H. Aspöck 1996	Revision des Genus Podallea
Podallea duellii U. Aspöck & H. Aspöck, 1996	AFR	Madagascar		Madagaskar Südküste Berenty Lichtfang Sekundärwald		U. Aspöck & H. Aspöck 1996	Revision des Genus Podallea
Podallea duellii U. Aspöck & H. Aspöck, 1996	AFR	Madagascar		Ambovombe		U. Aspöck & H. Aspöck 1996	Revision des Genus Podallea
Podallea exarmata (Tjeder, 1959)	AFR	Zimbabwe		Salisbury [=Harare]		U. Aspöck & H. Aspöck 1996	Revision des Genus Podallea
Podallea exarmata (Tjeder, 1959)	AFR	Zimbabwe		Khami Matabele'd		U. Aspöck & H. Aspöck 1996	Revision des Genus Podallea
Podallea exarmata (Tjeder, 1959)	AFR	Zimbabwe		Marandellas S. Rhodesia		U. Aspöck & H. Aspöck 1996	Revision des Genus Podallea
Podallea exarmata (Tjeder, 1959)	AFR	Zimbabwe		Rusape		U. Aspöck & H. Aspöck 1996	Revision des Genus Podallea
Podallea exarmata (Tjeder, 1959)	AFR	Zambia	Northern Province	Kaka, E. Mbala, 1300m	10°50'S, 30°40'E	Monserrat 2006	Nuevos datos sobre algunas especies...
Podallea exarmata (Tjeder, 1959)	AFR	Zimbabwe		Victoria Falls	17°55'S, 25°51'E	Tjeder 1959	The Lace-wings of Southern Africa, Familiy Berothidae
Podallea leroiana (Esben-Petersen, 1915)	AFR	Sudan		Bahr el Zeraf		U. Aspöck & H. Aspöck 1980	Das Genus Podallea
Podallea leroiana (Esben-Petersen, 1915)	AFR	Sudan		Lul (Bahr el Abiad)		U. Aspöck & H. Aspöck 1980	Das Genus Podallea
Podallea leroiana (Esben-Petersen, 1915)	AFR	Sudan		Abu Doleb (Bahr el Abiad)		U. Aspöck & H. Aspöck 1980	Das Genus Podallea
Podallea leroiana (Esben-Petersen, 1915)	AFR	Sudan		Dabba el Gardega (Bahr el Ghazal)		U. Aspöck & H. Aspöck 1980	Das Genus Podallea
Podallea leroiana (Esben-Petersen, 1915)	AFR	Sudan		Bahr el Ghazal		U. Aspöck & H. Aspöck 1980	Das Genus Podallea
Podallea leroiana (Esben-Petersen, 1915)	AFR	Ethiopia		Bourié Bord de la riv. Omo, 600m		U. Aspöck & H. Aspöck 1996	Revision des Genus Podallea
Podallea leroiana (Esben-Petersen, 1915)	AFR	Senegal		Rég. Sine Saloum Kahona b. Kao Lak		U. Aspöck & H. Aspöck 1996	Revision des Genus Podallea
Podallea leroiana (Esben-Petersen, 1915)	AFR	Senegal		N M'Bour	14°32'N, 16°58'W	U. Aspöck & H. Aspöck 1996	Revision des Genus Podallea
Podallea leroiana (Esben-Petersen, 1915)	AFR	Nigeria		Samaru		U. Aspöck & H. Aspöck 1996	Revision des Genus Podallea
Podallea leroiana (Esben-Petersen, 1915)	AFR	Nigeria		Samaru Zaira		U. Aspöck & H. Aspöck 1996	Revision des Genus Podallea
Podallea leroiana (Esben-Petersen, 1915)	AFR	Nigeria		Kaduna		U. Aspöck & H. Aspöck 1996	Revision des Genus Podallea
Podallea leroiana (Esben-Petersen, 1915)	AFR	Egypt		Bahr el Zaraf		Navás 1929	Monografía de la Familia de los Berótidos
Podallea leroiana (Esben-Petersen, 1915)	AFR	Egypt		Lul (Bahr el Abiad)		Navás 1929	Monografía de la Familia de los Berótidos
Podallea leroiana (Esben-Petersen, 1915)	AFR	Egypt		Abn Doleb (Bahr el Abiad)		Navás 1929	Monografía de la Familia de los Berótidos
Podallea leroiana (Esben-Petersen, 1915)	AFR	Egypt		Dabba el Gardega (Bahr el Ghazal)		Navás 1929	Monografía de la Familia de los Berótidos
Podallea leroiana (Esben-Petersen, 1915)	AFR	Egypt		Bahr el Gazal		Navás 1929	Monografía de la Familia de los Berótidos
Podallea leroiana (Esben-Petersen, 1915)	AFR	Ethiopia		Éthiopie méridionale: Bourillé, bords de la rivière Omo, st. 28, 600m		Navás 1936	Neuroptera, Embioptera, Plecoptera, Ephemeroptera et Trichoptera
Podallea leroiana (Esben-Petersen, 1915)	AFR	Sudan		Tonga	9°27'N, 31°20'E	Esben-Petersen 1930	Neuropteren
Podallea leroiana (Esben-Petersen, 1915)	AFR	Sudan		El Obeid	13°10'N, 30°13'E	Esben-Petersen 1930	Neuropteren
Podallea madegassica U. Aspöck & H. Aspöck, 1996	AFR	Madagascar		Ankarafantsika (Forest Reserve) near Marovoay		U. Aspöck & H. Aspöck 1996	Revision des Genus Podallea
Podallea madegassica U. Aspöck & H. Aspöck, 1996	AFR	Madagascar		Nosy Be		U. Aspöck & H. Aspöck 1996	Revision des Genus Podallea
Podallea manselli U. Aspöck & H. Aspöck, 1988	AFR	South Africa	Transvaal	Nylsvley Nat. Reserve, 1200m	24.39°S, 28.42°E	U. Aspöck & H. Aspöck 1988	Berlekrumyia africanella und Podallea manselli
Podallea manselli U. Aspöck & H. Aspöck, 1988	AFR	South Africa	Transvaal	Pietersburg, Northern Transvaal		U. Aspöck & H. Aspöck 1988	Berlekrumyia africanella und Podallea manselli
Podallea manselli U. Aspöck & H. Aspöck, 1988	AFR	South Africa	Transvaal	Langjan Nature Reserve	22.52°S, 29.14°E	U. Aspöck & H. Aspöck 1988	Berlekrumyia africanella und Podallea manselli
Podallea manselli U. Aspöck & H. Aspöck, 1988	AFR	South Africa	Transvaal	Mogol Nature Reserve, 900-1100m	23.58°S, 27.45°E	U. Aspöck & H. Aspöck 1988	Berlekrumyia africanella und Podallea manselli
Podallea manselli U. Aspöck & H. Aspöck, 1988	AFR	South Africa	Transvaal	Saartjiesnek (=20km W Pretoria), 1450m	25.44°S, 28°E	U. Aspöck & H. Aspöck 1988	Berlekrumyia africanella und Podallea manselli
Podallea manselli U. Aspöck & H. Aspöck, 1988	AFR	South Africa	Transvaal	North Honingneskrantz		U. Aspöck & H. Aspöck 1988	Berlekrumyia africanella und Podallea manselli
Podallea manselli U. Aspöck & H. Aspöck, 1988	AFR	South Africa	Transvaal	Soutpan, Pretoria Dist.	25.24°S, 28.06°E	U. Aspöck & H. Aspöck 1988	Berlekrumyia africanella und Podallea manselli
Podallea manselli U. Aspöck & H. Aspöck, 1988	AFR	South Africa	Transvaal	Pretoria Derdepoort	25.40°S, 28.20°E	U. Aspöck & H. Aspöck 1988	Berlekrumyia africanella und Podallea manselli
Podallea manselli U. Aspöck & H. Aspöck, 1988	AFR	South Africa	Transvaal	Buffelspoort Dam	25.47°S, 27.28°E	U. Aspöck & H. Aspöck 1988	Berlekrumyia africanella und Podallea manselli
Podallea manselli U. Aspöck & H. Aspöck, 1988	AFR	South Africa	Transvaal	Pretoria . Gardens of Union Buildings	25.45°S, 28.12°E	U. Aspöck & H. Aspöck 1988	Berlekrumyia africanella und Podallea manselli
Podallea manselli U. Aspöck & H. Aspöck, 1988	AFR	South Africa	Transvaal	Kruger National Park Skukuza, 500m	24.59°S, 31.55°E	U. Aspöck & H. Aspöck 1988	Berlekrumyia africanella und Podallea manselli
Podallea manselli U. Aspöck & H. Aspöck, 1988	AFR	South Africa	Natal	Ndumu Reserve Ingwavuma dist. Zululand		U. Aspöck & H. Aspöck 1988	Berlekrumyia africanella und Podallea manselli
Podallea manselli U. Aspöck & H. Aspöck, 1988	AFR	South Africa	Transvaal	Melkrivier, Natuurpral Resort, 1100m	24.00°S, 28.25°E	U. Aspöck & H. Aspöck 1996	Revision des Genus Podallea
Podallea manselli U. Aspöck & H. Aspöck, 1988	AFR	South Africa	Transvaal	D'Nyala N. R. Ellisras Dist., 850m	23.45°S, 24.49°E	U. Aspöck & H. Aspöck 1996	Revision des Genus Podallea
Podallea manselli U. Aspöck & H. Aspöck, 1988	AFR	South Africa	Transvaal	Fiesta Motel 20km S Potgietersrus, 1100m	24.17°S, 28.51°E	U. Aspöck & H. Aspöck 1996	Revision des Genus Podallea
Podallea manselli U. Aspöck & H. Aspöck, 1988	AFR	South Africa	Transvaal	Pretoria, Wapadrand, 1350m	25.48°S, 28.20E°	U. Aspöck & H. Aspöck 1996	Revision des Genus Podallea
Podallea manselli U. Aspöck & H. Aspöck, 1988	AFR	South Africa	Transvaal	Saartjiesnek (=20km W Pretoria), 1450m	25.44°S, 28.00E°	U. Aspöck & H. Aspöck 1996	Revision des Genus Podallea
Podallea manselli U. Aspöck & H. Aspöck, 1988	AFR	South Africa	Transvaal	Zoutpan, Pretoria Dist.	25.24°S, 28.06°E	U. Aspöck & H. Aspöck 1996	Revision des Genus Podallea
Podallea manselli U. Aspöck & H. Aspöck, 1988	AFR	South Africa	Transvaal	Pretoria		U. Aspöck & H. Aspöck 1996	Revision des Genus Podallea
Podallea manselli U. Aspöck & H. Aspöck, 1988	AFR	South Africa	Transvaal	Mooketsi		U. Aspöck & H. Aspöck 1996	Revision des Genus Podallea
Podallea manselli U. Aspöck & H. Aspöck, 1988	AFR	South Africa	Transvaal	Kruger NP, Santara	24.23°S, 31.46°E	U. Aspöck & H. Aspöck 1996	Revision des Genus Podallea
Podallea manselli U. Aspöck & H. Aspöck, 1988	AFR	Zaire		Mulongo, Mafinge		Monserrat 2006	Nuevos datos sobre algunas especies...
Podallea manselli U. Aspöck & H. Aspöck, 1988	AFR	Zambia	Northern Province	Mbala, 1500m	10°50'S, 31°10'E	Monserrat 2006	Nuevos datos sobre algunas especies...
Podallea manselli U. Aspöck & H. Aspöck, 1988	AFR	Zambia	Northern Province	Nachanga, 1400m	10°30'S, 31°50'E	Monserrat 2006	Nuevos datos sobre algunas especies...
Podallea manselli U. Aspöck & H. Aspöck, 1988	AFR	Zimbabwe	Mashonaland, East Province	Murehwa, 1300m	17°37'S, 31°44'E	Monserrat 2006	Nuevos datos sobre algunas especies...
Podallea manselli U. Aspöck & H. Aspöck, 1988	AFR	South Africa	Limpopo	Polokwane	23°53'S 29°32'E	Möller et al 2006	Larval morphology of Podallea vasseana and P. manselli
Podallea pauliani (Fraser, 1955)	AFR	Madagascar		Antsingy, Bekokapa		U. Aspöck & H. Aspöck 1996	Revision des Genus Podallea
Podallea pellita U. Aspöck & H. Aspöck, 1981	AFR	Ghana		E. Region Accra, Legon		U. Aspöck & H. Aspöck 1981	Das Genus Podallea
Podallea pellita U. Aspöck & H. Aspöck, 1981	AFR	Ghana		Legon Univ. of Ghana		U. Aspöck & H. Aspöck 1981	Das Genus Podallea
Podallea pellita U. Aspöck & H. Aspöck, 1981	AFR	Nigeria		N. Nigeria: Kaduna		U. Aspöck & H. Aspöck 1981	Das Genus Podallea
Podallea pellita U. Aspöck & H. Aspöck, 1981	AFR	Nigeria		N. Nigeria: Abuja		U. Aspöck & H. Aspöck 1981	Das Genus Podallea
Podallea pellita U. Aspöck & H. Aspöck, 1981	AFR	Nigeria		Samaru		U. Aspöck & H. Aspöck 1981	Das Genus Podallea
Podallea pellita U. Aspöck & H. Aspöck, 1981	AFR	Nigeria		Ibaden, IITA West Bank Lake		U. Aspöck & H. Aspöck 1981	Das Genus Podallea
Podallea pellita U. Aspöck & H. Aspöck, 1981	AFR	Cameroon		82km NE Obala		U. Aspöck & H. Aspöck 1981	Das Genus Podallea
Podallea pellita U. Aspöck & H. Aspöck, 1981	AFR	Senegal		1km NE Djibelor, about 7.5km SW Ziguinchor		U. Aspöck & H. Aspöck 1996	Revision des Genus Podallea
Podallea pellita U. Aspöck & H. Aspöck, 1981	AFR	Senegal		1.5km NE Djibélor, ca. 6.5km SW Ziguinchor		U. Aspöck & H. Aspöck 1996	Revision des Genus Podallea
Podallea pellita U. Aspöck & H. Aspöck, 1981	AFR	Senegal		ca. 3km SW Ziguinchor		U. Aspöck & H. Aspöck 1996	Revision des Genus Podallea
Podallea pellita U. Aspöck & H. Aspöck, 1981	AFR	Senegal		3km SSW Toubakouta 10km S Ziguinchor		U. Aspöck & H. Aspöck 1996	Revision des Genus Podallea
Podallea pellita U. Aspöck & H. Aspöck, 1981	AFR	Gambia		Tendeba Camp near River Gambia		U. Aspöck & H. Aspöck 1996	Revision des Genus Podallea
Podallea pellita U. Aspöck & H. Aspöck, 1981	AFR	Gambia		3.5km S George-Town, Hilltop at Sankuli Kunda, ca. 30m		U. Aspöck & H. Aspöck 1996	Revision des Genus Podallea
Podallea pellita U. Aspöck & H. Aspöck, 1981	AFR	Benin		45km N Abomey, Dassa-Logozobe, Mylino-"Teak"-Plantage		U. Aspöck & H. Aspöck 1996	Revision des Genus Podallea
Podallea pellita U. Aspöck & H. Aspöck, 1981	AFR	Nigeria		Ife-Ife W State		U. Aspöck & H. Aspöck 1996	Revision des Genus Podallea
Podallea pellita U. Aspöck & H. Aspöck, 1981	AFR	Nigeria		Lokoja		U. Aspöck & H. Aspöck 1996	Revision des Genus Podallea
Podallea pellita U. Aspöck & H. Aspöck, 1981	AFR	Nigeria		Zaira		U. Aspöck & H. Aspöck 1996	Revision des Genus Podallea
Podallea pellita U. Aspöck & H. Aspöck, 1981	AFR	Zaire				U. Aspöck & H. Aspöck 1996	Revision des Genus Podallea
Podallea pellita U. Aspöck & H. Aspöck, 1981	AFR	Congo		6mi E of Thysville	5.16°S, 14.53°E	U. Aspöck & H. Aspöck 1996	Revision des Genus Podallea
Podallea sashilana (Navás, 1931)	AFR	Madagascar		Bekily Reg, Sud de l'ile		U. Aspöck & H. Aspöck 1996	Revision des Genus Podallea
Podallea sashilana (Navás, 1931)	AFR	Zaire		Sashila		U. Aspöck & H. Aspöck 1996	Revision des Genus Podallea
Podallea sashilana (Navás, 1931)	AFR	Zaire		Elisabethville		U. Aspöck & H. Aspöck 1996	Revision des Genus Podallea
Podallea sashilana (Navás, 1931)	AFR	Zaire		Lulua		Monserrat 2006	Nuevos datos sobre algunas especies...
Podallea sashilana (Navás, 1931)	AFR	Central African Republic		Batangafo, Ubangi-Shari	7°18'N, 18°17'E	Banks 1939	Zoological Results of the George Vanderbilt
Podallea seyrigina (Navás, 1935)	AFR	Madagascar		Békily	23°44'S, 46°00'E	Navás 1934	Insectos de Madagascar
Podallea sp.	AFR	South Africa	Mpumalanga	Berg en Dal, Kruger National Park, 25.26S 31.27E, 350m		Mansell & H. Aspöck 1990	Post-Symposium Neuropterological excursions
Podallea tansanica U. Aspöck & H. Aspöck, 1996	AFR	Tanzania		Tanganyika: 10mi. E of Korogwe, 300m		U. Aspöck & H. Aspöck 1996	Revision des Genus Podallea
Podallea tjederi U. Aspöck & H. Aspöck, 1981	AFR	Nigeria		Inst. Agr. Res., 5 miles NW Mokwa		U. Aspöck & H. Aspöck 1981	Das Genus Podallea
Podallea tjederi U. Aspöck & H. Aspöck, 1981	AFR	Cameroon		Adamaua Poli (500m) b. Garua (=Garoua)		U. Aspöck & H. Aspöck 1981	Das Genus Podallea
Podallea tjederi U. Aspöck & H. Aspöck, 1981	AFR	Sierra Leone				U. Aspöck & H. Aspöck 1981	Das Genus Podallea
Podallea tjederi U. Aspöck & H. Aspöck, 1981	AFR	Benin		45km N Abomey, Dassa-Logozobe, Mylino-"Teak"-Plantage		U. Aspöck & H. Aspöck 1996	Revision des Genus Podallea
Podallea tjederi U. Aspöck & H. Aspöck, 1981	AFR	Benin		Cotonou, Lichtfalle bei Neuenschwander		U. Aspöck & H. Aspöck 1996	Revision des Genus Podallea
Podallea tjederi U. Aspöck & H. Aspöck, 1981	AFR	Nigeria		Fashola W state IX		U. Aspöck & H. Aspöck 1996	Revision des Genus Podallea
Podallea tjederi U. Aspöck & H. Aspöck, 1981	AFR	Nigeria	Oyo	Ogbomosho		U. Aspöck & H. Aspöck 1996	Revision des Genus Podallea
Podallea tjederi U. Aspöck & H. Aspöck, 1981	AFR	Nigeria		Plateau State, Pandam, W. Park, 130m		U. Aspöck & H. Aspöck 1996	Revision des Genus Podallea
Podallea tjederi U. Aspöck & H. Aspöck, 1981	AFR	Nigeria		Jos, alt. 1300m		U. Aspöck & H. Aspöck 1996	Revision des Genus Podallea
Podallea tjederi U. Aspöck & H. Aspöck, 1981	AFR	Nigeria		Vdo FR W State		U. Aspöck & H. Aspöck 1996	Revision des Genus Podallea
Podallea tjederi U. Aspöck & H. Aspöck, 1981	AFR	Nigeria	Ogoja	Abakaliki		U. Aspöck & H. Aspöck 1996	Revision des Genus Podallea
Podallea tjederi U. Aspöck & H. Aspöck, 1981	AFR	Nigeria	Kabba	Kabba		U. Aspöck & H. Aspöck 1996	Revision des Genus Podallea
Podallea tjederi U. Aspöck & H. Aspöck, 1981	AFR	Nigeria	Kabba	Lokoja		U. Aspöck & H. Aspöck 1996	Revision des Genus Podallea
Podallea tjederi U. Aspöck & H. Aspöck, 1981	AFR	Nigeria		Umuahia E State	5°35'N, 7°35'E	U. Aspöck & H. Aspöck 1996	Revision des Genus Podallea
Podallea tjederi U. Aspöck & H. Aspöck, 1981	AFR	Nigeria		Vdo i NW State	6°45'N, 6°40'E	U. Aspöck & H. Aspöck 1996	Revision des Genus Podallea
Podallea tjederi U. Aspöck & H. Aspöck, 1981	AFR	Gambia		3.5km George Town, Hilltop at Sankuli Kunda, alt. about 30m		U. Aspöck & H. Aspöck 1996	Revision des Genus Podallea
Podallea tjederi U. Aspöck & H. Aspöck, 1981	AFR	Sudan	Kassala Province	sept. or., Red-Sea-Hills R. Remane		U. Aspöck & H. Aspöck 1996	Revision des Genus Podallea
Podallea tjederi U. Aspöck & H. Aspöck, 1981	AFR	Sudan		Erkowit-Massiv, 1100-1300m		U. Aspöck & H. Aspöck 1996	Revision des Genus Podallea
Podallea tjederi U. Aspöck & H. Aspöck, 1981	AFR	Sierra Leone			8°30'N, 11°40'W	U. Aspöck & H. Aspöck 1981	Das Genus Podallea
Podallea vasseana (Navás, 1910)	AFR	Ethiopia		merid Bourié bord de la riv. Omo		U. Aspöck & H. Aspöck 1980	Das Genus Podallea
Podallea vasseana (Navás, 1910)	AFR	Kenya		Tsavo Park, Tsavo River at Kitani Lodge		U. Aspöck & H. Aspöck 1980	Das Genus Podallea
Podallea vasseana (Navás, 1910)	AFR	Malawi		Mt. Mlanje, Nyasaland		U. Aspöck & H. Aspöck 1980	Das Genus Podallea
Podallea vasseana (Navás, 1910)	AFR	Ethiopia		Bodji/Wollega		U. Aspöck & H. Aspöck 1980	Das Genus Podallea
Podallea vasseana (Navás, 1910)	AFR	Mozambique		Prov. de Gorongoza Tendos de l'Urema		U. Aspöck & H. Aspöck 1996	Revision des Genus Podallea
Podallea vasseana (Navás, 1910)	AFR	Nigeria		Samaru		U. Aspöck & H. Aspöck 1996	Revision des Genus Podallea
Podallea vasseana (Navás, 1910)	AFR	Nigeria		Kaduna		U. Aspöck & H. Aspöck 1996	Revision des Genus Podallea
Podallea vasseana (Navás, 1910)	AFR	Nigeria		Samaru, Zaria		U. Aspöck & H. Aspöck 1996	Revision des Genus Podallea
Podallea vasseana (Navás, 1910)	AFR	Nigeria		Nr. Akwanga, Gui		U. Aspöck & H. Aspöck 1996	Revision des Genus Podallea
Podallea vasseana (Navás, 1910)	AFR	Nigeria		NW State Zugurna		U. Aspöck & H. Aspöck 1996	Revision des Genus Podallea
Podallea vasseana (Navás, 1910)	AFR	Nigeria		K. State Shangana		U. Aspöck & H. Aspöck 1996	Revision des Genus Podallea
Podallea vasseana (Navás, 1910)	AFR	Nigeria		Wawa K State		U. Aspöck & H. Aspöck 1996	Revision des Genus Podallea
Podallea vasseana (Navás, 1910)	AFR	Ethiopia		Bourié Bord de la riv. Omo, 600m		U. Aspöck & H. Aspöck 1996	Revision des Genus Podallea
Podallea vasseana (Navás, 1910)	AFR	Uganda		Mbarara		U. Aspöck & H. Aspöck 1996	Revision des Genus Podallea
Podallea vasseana (Navás, 1910)	AFR	Kenya		Kilifi Dist. Mkongani, alt 150'		U. Aspöck & H. Aspöck 1996	Revision des Genus Podallea
Podallea vasseana (Navás, 1910)	AFR	Tanzania		Ukerewe Ins. Victoria See		U. Aspöck & H. Aspöck 1996	Revision des Genus Podallea
Podallea vasseana (Navás, 1910)	AFR	Tanzania		Tang. Terr. Ukerewe I.		U. Aspöck & H. Aspöck 1996	Revision des Genus Podallea
Podallea vasseana (Navás, 1910)	AFR	Tanzania		Lulanguru		U. Aspöck & H. Aspöck 1996	Revision des Genus Podallea
Podallea vasseana (Navás, 1910)	AFR	Tanzania		Lulanguru, 17mls. W of Tabora, 1148m		U. Aspöck & H. Aspöck 1996	Revision des Genus Podallea
Podallea vasseana (Navás, 1910)	AFR	Tanzania		Makoa T. T. O-Afr		U. Aspöck & H. Aspöck 1996	Revision des Genus Podallea
Podallea vasseana (Navás, 1910)	AFR	Tanzania		Morogoro (SUA)		U. Aspöck & H. Aspöck 1996	Revision des Genus Podallea
Podallea vasseana (Navás, 1910)	AFR	Zimbabwe		S. Rhodesia: Victoria Falls		U. Aspöck & H. Aspöck 1996	Revision des Genus Podallea
Podallea vasseana (Navás, 1910)	AFR	Zimbabwe		Bulawayo S. Rhodesia		U. Aspöck & H. Aspöck 1996	Revision des Genus Podallea
Podallea vasseana (Navás, 1910)	AFR	Zimbabwe		Marandellas S. Rhodesia		U. Aspöck & H. Aspöck 1996	Revision des Genus Podallea
Podallea vasseana (Navás, 1910)	AFR	Zimbabwe		Lundi, S. Rh.		U. Aspöck & H. Aspöck 1996	Revision des Genus Podallea
Podallea vasseana (Navás, 1910)	AFR	Zimbabwe		Rusape		U. Aspöck & H. Aspöck 1996	Revision des Genus Podallea
Podallea vasseana (Navás, 1910)	AFR	Botswana		Serowe Farmer's Brigade		U. Aspöck & H. Aspöck 1996	Revision des Genus Podallea
Podallea vasseana (Navás, 1910)	AFR	Angola		12 mi. S. E. Sá da Bandeira 1600m		U. Aspöck & H. Aspöck 1996	Revision des Genus Podallea
Podallea vasseana (Navás, 1910)	AFR	Angola		24 mi. SE of Chibia, 1320m		U. Aspöck & H. Aspöck 1996	Revision des Genus Podallea
Podallea vasseana (Navás, 1910)	AFR	Angola		Villa Luso, Mox.		U. Aspöck & H. Aspöck 1996	Revision des Genus Podallea
Podallea vasseana (Navás, 1910)	AFR	Angola		Gabela A. 32.		U. Aspöck & H. Aspöck 1996	Revision des Genus Podallea
Podallea vasseana (Navás, 1910)	AFR	Namibia		Dist. Kavango, 20km SW Rundu, 1100m	18°03'07''S, 19°37'52''E	U. Aspöck & H. Aspöck 1996	Revision des Genus Podallea
Podallea vasseana (Navás, 1910)	AFR	Namibia		Dist. Kavango, 20km E Rundu, 1100m	17°56'S, 19°55'E	U. Aspöck & H. Aspöck 1996	Revision des Genus Podallea
Podallea vasseana (Navás, 1910)	AFR	Namibia		9km SW Otavi, Achalm Farm, 1500m	19°43'S, 17°20'E	U. Aspöck & H. Aspöck 1996	Revision des Genus Podallea
Podallea vasseana (Navás, 1910)	AFR	Namibia		D. Grootfontein Kupferberg-Farm, 25km E Otavi, 1600-1700m	19°38'51''S, 17°34'23''E	U. Aspöck & H. Aspöck 1996	Revision des Genus Podallea
Podallea vasseana (Navás, 1910)	AFR	Namibia		Distr. Grootfontein Tigerschlucht, NE Kombat, 1600-1700m	19.27S, 17.38E	U. Aspöck & H. Aspöck 1996	Revision des Genus Podallea
Podallea vasseana (Navás, 1910)	AFR	Namibia		Enuyu Ovambo	17°23'S, 16°23'E	U. Aspöck & H. Aspöck 1996	Revision des Genus Podallea
Podallea vasseana (Navás, 1910)	AFR	Namibia		Elandsdrink Waterberg Pl. Park	20°19'S, 17°22'E	U. Aspöck & H. Aspöck 1996	Revision des Genus Podallea
Podallea vasseana (Navás, 1910)	AFR	Namibia		Kiewietdrink Waterberg Pl. Park	20°18'S, 17°18'E	U. Aspöck & H. Aspöck 1996	Revision des Genus Podallea
Podallea vasseana (Navás, 1910)	AFR	Namibia		Huilboom Waterberg Pl. Park	20°25'S, 17°15'E	U. Aspöck & H. Aspöck 1996	Revision des Genus Podallea
Podallea vasseana (Navás, 1910)	AFR	South Africa		Mkuse		U. Aspöck & H. Aspöck 1996	Revision des Genus Podallea
Podallea vasseana (Navás, 1910)	AFR	South Africa	Transvaal	12km SE Trichards-Dal.		U. Aspöck & H. Aspöck 1996	Revision des Genus Podallea
Podallea vasseana (Navás, 1910)	AFR	South Africa	Transvaal	Hans Merensky Nat. Res.	23.40°S, 30.39°E	U. Aspöck & H. Aspöck 1996	Revision des Genus Podallea
Podallea vasseana (Navás, 1910)	AFR	South Africa	Transvaal	Lapalala Reserve, Molope Camp., 1050m	23.53°S, 28.20°E	U. Aspöck & H. Aspöck 1996	Revision des Genus Podallea
Podallea vasseana (Navás, 1910)	AFR	South Africa	Transvaal	Melkrivier, Natuurpral Resort, 1100m	24.00°S, 28.25°E	U. Aspöck & H. Aspöck 1996	Revision des Genus Podallea
Podallea vasseana (Navás, 1910)	AFR	South Africa	Transvaal	Nylsvley Nat. Reserve, 1200m	24.39°S, 28.42°E	U. Aspöck & H. Aspöck 1996	Revision des Genus Podallea
Podallea vasseana (Navás, 1910)	AFR	South Africa	Transvaal	Fiesta Motel 20km S Potgietersrus, 1100m	24.17°S, 28.51°E	U. Aspöck & H. Aspöck 1996	Revision des Genus Podallea
Podallea vasseana (Navás, 1910)	AFR	South Africa	Transvaal	D'Nyala N. R. Ellisras Dist., 850m	23.45°S, 24.49°E	U. Aspöck & H. Aspöck 1996	Revision des Genus Podallea
Podallea vasseana (Navás, 1910)	AFR	South Africa	Transvaal	Soutpan, Pretoria Dist.	25.24°S, 28.06°E	U. Aspöck & H. Aspöck 1996	Revision des Genus Podallea
Podallea vasseana (Navás, 1910)	AFR	South Africa	Transvaal	Hoogenoeg Mine		U. Aspöck & H. Aspöck 1996	Revision des Genus Podallea
Podallea vasseana (Navás, 1910)	AFR	South Africa	Transvaal	Zebediela Nat. Res.		U. Aspöck & H. Aspöck 1996	Revision des Genus Podallea
Podallea vasseana (Navás, 1910)	AFR	South Africa	Transvaal	Roode Plaat Pretoria District	25.41°S, 28.18°E	U. Aspöck & H. Aspöck 1996	Revision des Genus Podallea
Podallea vasseana (Navás, 1910)	AFR	South Africa	Transvaal	Pretoria, 1250-1400m	25.45°S, 28.12°E	U. Aspöck & H. Aspöck 1996	Revision des Genus Podallea
Podallea vasseana (Navás, 1910)	AFR	South Africa	Transvaal	Pretoria, Wapadrand, 1350m	25.48°S, 28.20°E	U. Aspöck & H. Aspöck 1996	Revision des Genus Podallea
Podallea vasseana (Navás, 1910)	AFR	South Africa	Transvaal	Zoutpan (NNW Pretoria), 1500m	25.30°S, 28°E	U. Aspöck & H. Aspöck 1996	Revision des Genus Podallea
Podallea vasseana (Navás, 1910)	AFR	South Africa	Transvaal	Soutpansberg, 1180-1450m, Ingwe-Motel, 15km N Louis Trichardt	22.58°S, 29.57°E	U. Aspöck & H. Aspöck 1996	Revision des Genus Podallea
Podallea vasseana (Navás, 1910)	AFR	South Africa	Transvaal	Wylie Spoort, Ingwe-Mot., 1250-1450m	22.58°S, 29.57°E	U. Aspöck & H. Aspöck 1996	Revision des Genus Podallea
Podallea vasseana (Navás, 1910)	AFR	South Africa	Transvaal	Soutpansberg Ingwe 15km N Lois Trichard	22.58°S, 29.56°E	U. Aspöck & H. Aspöck 1996	Revision des Genus Podallea
Podallea vasseana (Navás, 1910)	AFR	South Africa	Transvaal	Rustenberg Nat. Res., 950m	25.40°S, 27.12°E	U. Aspöck & H. Aspöck 1996	Revision des Genus Podallea
Podallea vasseana (Navás, 1910)	AFR	South Africa	Transvaal	Mogol Nature Reserve, Elisras Dist.	23.58°S, 27.45°E	U. Aspöck & H. Aspöck 1996	Revision des Genus Podallea
Podallea vasseana (Navás, 1910)	AFR	South Africa	Transvaal	Langjan Nature Reserve	22.52°S, 29.14°E	U. Aspöck & H. Aspöck 1996	Revision des Genus Podallea
Podallea vasseana (Navás, 1910)	AFR	South Africa	Transvaal	Letaba in the Kruger National Park		U. Aspöck & H. Aspöck 1996	Revision des Genus Podallea
Podallea vasseana (Navás, 1910)	AFR	South Africa	Transvaal	Kruger National Park Skukuza, 500m	24.59°S, 31.55°E	U. Aspöck & H. Aspöck 1996	Revision des Genus Podallea
Podallea vasseana (Navás, 1910)	AFR	South Africa	Transvaal	Shingwedzi, Kruger National Park	23.07°S, 31.26°E	U. Aspöck & H. Aspöck 1996	Revision des Genus Podallea
Podallea vasseana (Navás, 1910)	AFR	South Africa	Transvaal	Punda Maria Kruger Nat. Park	22.43°S, 31.02°E	U. Aspöck & H. Aspöck 1996	Revision des Genus Podallea
Podallea vasseana (Navás, 1910)	AFR	South Africa	Transvaal	Satara Kruger Nat. Park	24.25°S, 31.46°E	U. Aspöck & H. Aspöck 1996	Revision des Genus Podallea
Podallea vasseana (Navás, 1910)	AFR	South Africa	Transvaal	Kruger Nat. Park Pafuri	22.26°S, 31.12°E	U. Aspöck & H. Aspöck 1996	Revision des Genus Podallea
Podallea vasseana (Navás, 1910)	AFR	South Africa	Transvaal	Kruger Nat. Park Balule		U. Aspöck & H. Aspöck 1996	Revision des Genus Podallea
Podallea vasseana (Navás, 1910)	AFR	South Africa	Transvaal	Kruger Nat. Park Punda Maria	22.41°S, 31.02°E	U. Aspöck & H. Aspöck 1996	Revision des Genus Podallea
Podallea vasseana (Navás, 1910)	AFR	South Africa	Transvaal	Barberton	25.48°S, 31.03°E	U. Aspöck & H. Aspöck 1996	Revision des Genus Podallea
Podallea vasseana (Navás, 1910)	AFR	South Africa		Punda Milia K. N. P.		U. Aspöck & H. Aspöck 1996	Revision des Genus Podallea
Podallea vasseana (Navás, 1910)	AFR	South Africa	Natal	Ndumu Reserve Ingwavuma dist. Zululand		U. Aspöck & H. Aspöck 1996	Revision des Genus Podallea
Podallea vasseana (Navás, 1910)	AFR	South Africa	Kwa-Zulu	35km N Jozini Ndumu Road	27.11°S, 32.04°E	U. Aspöck & H. Aspöck 1996	Revision des Genus Podallea
Podallea vasseana (Navás, 1910)	AFR	Madagascar		Südküste Berenty Lichtfang Sekundärwald		U. Aspöck & H. Aspöck 1996	Revision des Genus Podallea
Podallea vasseana (Navás, 1910)	AFR	Madagascar		Majunga Prov. 3km NE Boanamary		U. Aspöck & H. Aspöck 1996	Revision des Genus Podallea
Podallea vasseana (Navás, 1910)	AFR	Comoros	Mayotte	SW Mamoudzou, Wald am Koualé	12°48'S, 45°12'E	U. Aspöck & H. Aspöck 1996	Revision des Genus Podallea
Podallea vasseana (Navás, 1910)	AFR	Comoros	Mayotte	Mamoudzou		U. Aspöck & H. Aspöck 1996	Revision des Genus Podallea
Podallea vasseana (Navás, 1910)	AFR	Comoros	Mayotte	5km W Mamoudzou		U. Aspöck & H. Aspöck 1996	Revision des Genus Podallea
Podallea vasseana (Navás, 1910)	AFR	Comoros	Mayotte	S Stadtrand Mamoudzou		U. Aspöck & H. Aspöck 1996	Revision des Genus Podallea
Podallea vasseana (Navás, 1910)	AFR	Comoros	Mayotte	1km S Bandrélé	12°50'S, 45°11'E	U. Aspöck & H. Aspöck 1996	Revision des Genus Podallea
Podallea vasseana (Navás, 1910)	AFR	Mozambique		Nyembe-Bulungwa		Krüger 1922	Berothidae. Beiträge zu einer Monographie
Podallea vasseana (Navás, 1910)	AFR	Mozambique	Gorongoza	Tendos del Urema		Navás 1910	Hemeróbidos nuevos
Podallea vasseana (Navás, 1910)	AFR	Ethiopia		Éthiopie méridionale: Bourillé, bords de la rivière Omo, st. 28, 600m		Navás 1936	Neuroptera, Embioptera, Plecoptera, Ephemeroptera et Trichoptera
Podallea vasseana (Navás, 1910)	AFR	Mali	Douna	Zinzana		Monserrat 2006	Nuevos datos sobre algunas especies...
Podallea vasseana (Navás, 1910)	AFR	Zambia	Northern Province	Kaka, E. Mbala, 1300m	10°50'S, 30°40'E	Monserrat 2006	Nuevos datos sobre algunas especies...
Podallea vasseana (Navás, 1910)	AFR	Ethiopia	Ethiopie Mérid.	Bourié, Bord de la Riv. Omo, 600m		Monserrat 2006	Nuevos datos sobre algunas especies...
Podallea vasseana (Navás, 1910)	AFR	Madagascar				U. Aspöck, Randolf & H. Aspöck H. 2010	The Berothidae of Madagascar
Podallea vasseana (Navás, 1910)	AFR	South Africa	Limpopo	Gravelotte	23°43'S 30°40'E	Möller et al 2006	Larval morphology of Podallea vasseana and P. manselli
Podallea vasseana (Navás, 1910)	AFR	South Africa		M'fongosi, Zululand	28°42'S, 30°50'E	Tjeder 1959	The Lace-wings of Southern Africa, Familiy Berothidae
Podallea vasseana (Navás, 1910)	AFR	Zimbabwe		Livingstone	17°51'S, 25°49'E	Tjeder 1959	The Lace-wings of Southern Africa, Familiy Berothidae
Podallea vasseana (Navás, 1910)	AFR	Democratic Republic of the Congo		Leopoldville	4°23'S, 15°58'E	Navás 1930	Insectes du Congo Belge. Série IV.
Podallea vasseana (Navás, 1910)	AFR	Democratic Republic of the Congo	Katanga	Sandoa	9°40'S, 22°52'E	Navás 1936	Insectes du Congo Belge. Série IX
Podallea vasseana (Navás, 1910)	AFR	Madagascar		Ankazoaba	18°25'S, 47°05'E	U. Aspöck & H. Aspöck 1996	Revision des Genus Podallea
Podallea wewalkai U. Aspöck & H. Aspöck, 1996	AFR	Zaire		Haut-Zaire, Umg. Doruma		U. Aspöck & H. Aspöck 1996	Revision des Genus Podallea
Protobiella zelandica Tillyard, 1923	ASI	New Zealand		Takaka / Terakohe, near Takaka, Golden Bay		U. Aspöck & H. Aspöck 1984	Die Berothiden Australiens (und Neuseelands) II
Protobiella zelandica Tillyard, 1923	ASI	New Zealand		Waitati		U. Aspöck & H. Aspöck 1984	Die Berothiden Australiens (und Neuseelands) II
Protobiella zelandica Tillyard, 1923	ASI	New Zealand		Takaka, Golden Bay		Navás 1929	Monografía de la Familia de los Berótidos
Protobiella zelandica Tillyard, 1923	ASI	New Zealand		Waitati		Navás 1929	Monografía de la Familia de los Berótidos
Protobiella zelandica Tillyard, 1923	ASI	New Zealand		Tarakohe, near Takaka, Golden Bay		Tillyard 1923	Descriptions of New Species and Varieties…
Protobiella zelandica Tillyard, 1923	ASI	New Zealand		Waitati (15km north of Dunedin)		Tillyard 1923	Descriptions of New Species and Varieties…
Protobiella zelandica Tillyard, 1923	ASI	New Zealand		Fletchers Ck, West Inangahua (ca. 10km S Inangahua, 150km S Tarakohe)		Wise 1992	The New Zealand Species of Berothidae
Protobiella zelandica Tillyard, 1923	ASI	New Zealand	North Island	Wayby Gorge		Wise 1992	The New Zealand Species of Berothidae
Protobiella zelandica Tillyard, 1923	ASI	New Zealand		Gollans Valley, Wellington		Wise 1992	The New Zealand Species of Berothidae
Protobiella zelandica Tillyard, 1923	ASI	New Zealand		Upper Gollans Valley		Wise 1992	The New Zealand Species of Berothidae
Protobiella zelandica Tillyard, 1923	ASI	New Zealand		Erua		Wise 1992	The New Zealand Species of Berothidae
Quasispermophorella ingwa U. Aspöck & H. Aspöck, 1986	AUS	Australia	Western Australia	9mi S Margaret River		U. Aspöck & H. Aspöck 1986	Die Berothiden Australiens III
Quasispermophorella ingwa U. Aspöck & H. Aspöck, 1986	AUS	Australia	Western Australia	24mi E Pinjarra		U. Aspöck & H. Aspöck 1986	Die Berothiden Australiens III
Quasispermophorella ingwa U. Aspöck & H. Aspöck, 1986	AUS	Australia	Western Australia	5 miles N of Nannup		U. Aspöck & H. Aspöck 1986	Die Berothiden Australiens III
Quasispermophorella ingwa U. Aspöck & H. Aspöck, 1986	AUS	Australia	Western Australia	19miles ENE of Perth		U. Aspöck & H. Aspöck 1986	Die Berothiden Australiens III
Quasispermophorella ingwa U. Aspöck & H. Aspöck, 1986	AUS	Australia	Western Australia	Hill River		U. Aspöck & H. Aspöck 1986	Die Berothiden Australiens III
Quasispermophorella neuropunctata (Esben-Petersen, 1917)	AUS	Australia	New South Wales	Brewarrima		Navás 1929	Monografía de la Familia de los Berótidos
Quasispermophorella neuropunctata (Esben-Petersen, 1917)	AUS	Australia	New South Wales	Brewarrina		Esben-Petersen 1917	Australian Neuroptera
Spermophorella burmanni U. Aspöck & H. Aspöck, 1989	AUS	Australia	Queensland	NW Dajarra, 300m	21.40°S, 139.33°E	U. Aspöck & H. Aspöck 1989	Die Berothiden Australiens VI
Spermophorella christophi U. Aspöck & H. Aspöck, 1986	AUS	Australia	Western Australia	N Halls Creek, S Turkey Creek, 200m	17.05°S, 128.12°E	U. Aspöck & H. Aspöck 1986	Die Berothiden Australiens III
Spermophorella christophi U. Aspöck & H. Aspöck, 1986	AUS	Australia	Western Australia	Kimberleys, King Leopold Range, 200m	17.15°S, 125.15°E	U. Aspöck & H. Aspöck 1986	Die Berothiden Australiens III
Spermophorella christophi U. Aspöck & H. Aspöck, 1986	AUS	Australia	Western Australia	The Kimberleys, W.A. S.W. of Bedford Dns. 10m.S. Landsdowne H.S.		U. Aspöck & H. Aspöck 1986	Die Berothiden Australiens III
Spermophorella christophi U. Aspöck & H. Aspöck, 1986	AUS	Australia	Western Australia	150km SE by E Broome	18.55°S, 123.14°E	U. Aspöck & H. Aspöck 1986	Die Berothiden Australiens III
Spermophorella disseminata Tillyard, 1916	AUS	Australia	New South Wales	Nat. Park [Kenthurst]		U. Aspöck & H. Aspöck 1986	Die Berothiden Australiens III
Spermophorella disseminata Tillyard, 1916	AUS	Australia	New South Wales	Heathcote		U. Aspöck & H. Aspöck 1986	Die Berothiden Australiens III
Spermophorella disseminata Tillyard, 1916	AUS	Australia	New South Wales	Hornsby		U. Aspöck & H. Aspöck 1986	Die Berothiden Australiens III
Spermophorella disseminata Tillyard, 1916	AUS	Australia	New South Wales	Palm Beach		U. Aspöck & H. Aspöck 1986	Die Berothiden Australiens III
Spermophorella disseminata Tillyard, 1916	AUS	Australia	New South Wales	Kenthurst		Navás 1929	Monografía de la Familia de los Berótidos
Spermophorella disseminata Tillyard, 1916	AUS	Australia	New South Wales	Kenthurst		Tillyard 1916	Studies in Australian Neuroptera No. IV
Spermophorella goobita U. Aspöck & H. Aspöck, 1986	AUS	Australia	Western Australia	25 W Coolgardie		U. Aspöck & H. Aspöck 1986	Die Berothiden Australiens III
Spermophorella goobita U. Aspöck & H. Aspöck, 1986	AUS	Australia	Western Australia	38km WNW of Balladonia Motel	31.07°S, 123.15°E	U. Aspöck & H. Aspöck 1986	Die Berothiden Australiens III
Spermophorella kurtbaueri U. Aspöck & H. Aspöck, 1987	AUS	Australia	Western Australia	Road Kununurra-Gibb River, Durack R., 200m	16.15°S, 127.12°E	U. Aspöck & H. Aspöck 1987	Die Berothiden Australiens IV
Spermophorella kurtbaueri U. Aspöck & H. Aspöck, 1987	AUS	Australia	Northern Territory	W Timber Creek, 50m	15.53°S, 130.31°E	U. Aspöck & H. Aspöck 1987	Die Berothiden Australiens IV
Spermophorella kurtbaueri U. Aspöck & H. Aspöck, 1987	AUS	Australia	Western Australia	Kimberleys, Geikie Gorge Nat. P., 100m	18.04°S, 125.43°E	U. Aspöck & H. Aspöck 1987	Die Berothiden Australiens IV
Spermophorella kurtbaueri U. Aspöck & H. Aspöck, 1987	AUS	Australia	Western Australia	Kimberleys, King Leopold Range, 200m	17.15°S, 125.15°E	U. Aspöck & H. Aspöck 1987	Die Berothiden Australiens IV
Spermophorella kurtbaueri U. Aspöck & H. Aspöck, 1987	AUS	Australia	Western Australia	Kimberleys, Mount Barnett, 350m	16.40°S, 125.57°E	U. Aspöck & H. Aspöck 1987	Die Berothiden Australiens IV
Spermophorella kurtbaueri U. Aspöck & H. Aspöck, 1987	AUS	Australia	Northern Territory	Edith Falls, 200m	14.11°S, 132.15°E	U. Aspöck & H. Aspöck 1987	Die Berothiden Australiens IV
Spermophorella kurtbaueri U. Aspöck & H. Aspöck, 1987	AUS	Australia	Northern Territory	Nourlangie Ck., 8km N of Mt. Cahill	12.48°S, 132.42°E	U. Aspöck & H. Aspöck 1987	Die Berothiden Australiens IV
Spermophorella kurtbaueri U. Aspöck & H. Aspöck, 1987	AUS	Australia	Northern Territory	48mi. SW of Daly River	14.11°S, 130.08°E	U. Aspöck & H. Aspöck 1987	Die Berothiden Australiens IV
Spermophorella kurtbaueri U. Aspöck & H. Aspöck, 1987	AUS	Australia	Western Australia	West Kimberley, 4km WNW of Martin's Well		U. Aspöck & H. Aspöck 1987	Die Berothiden Australiens IV
Spermophorella kurtbaueri U. Aspöck & H. Aspöck, 1987	AUS	Australia	Western Australia	Drysdale River	14.39°S, 126.57°E	U. Aspöck & H. Aspöck 1987	Die Berothiden Australiens IV
Spermophorella maculatissima Tillyard, 1916	AUS	Australia	Queensland	Brisbane		U. Aspöck & H. Aspöck 1987	Die Berothiden Australiens IV
Spermophorella maculatissima Tillyard, 1916	AUS	Australia	Queensland	One Tree Hill. Bris.		U. Aspöck & H. Aspöck 1987	Die Berothiden Australiens IV
Spermophorella maculatissima Tillyard, 1916	AUS	Australia	Queensland	G.H.Hardy Brisbane		U. Aspöck & H. Aspöck 1987	Die Berothiden Australiens IV
Spermophorella maculatissima Tillyard, 1916	AUS	Australia	Queensland	Carnavon Gorge		U. Aspöck & H. Aspöck 1987	Die Berothiden Australiens IV
Spermophorella maculatissima Tillyard, 1916	AUS	Australia	Queensland	Eidsvold		U. Aspöck & H. Aspöck 1987	Die Berothiden Australiens IV
Spermophorella maculatissima Tillyard, 1916	AUS	Australia	Queensland	4 miles SSE of Yeppoon		U. Aspöck & H. Aspöck 1987	Die Berothiden Australiens IV
Spermophorella maculatissima Tillyard, 1916	AUS	Australia	Queensland	Palm Park 3 1/2 mi ESE of Byfield		U. Aspöck & H. Aspöck 1987	Die Berothiden Australiens IV
Spermophorella maculatissima Tillyard, 1916	AUS	Australia		Hagnelic Isl.		U. Aspöck & H. Aspöck 1987	Die Berothiden Australiens IV
Spermophorella maculatissima Tillyard, 1916	AUS	Australia		One Tree Hill, bei Brisbane		Navás 1929	Monografía de la Familia de los Berótidos
Spermophorella maculatissima Tillyard, 1916	AUS	Australia		One Tree Hill, bei Brisbane		Tillyard 1916	Studies in Australian Neuroptera No. IV
Spermophorella mjobergi (Esben-Petersen, 1918)	AUS	Australia	Western Australia	Kimberley district		U. Aspöck & H. Aspöck 1987	Die Berothiden Australiens IV
Spermophorella mjobergi (Esben-Petersen, 1918)	AUS	Australia	Western Australia	The Kimberleys, W.A. S.W. of Bedford Dns. 10m.S. Landsdowne H.S.		U. Aspöck & H. Aspöck 1987	Die Berothiden Australiens IV
Spermophorella mjobergi (Esben-Petersen, 1918)	AUS	Australia	Western Australia	Kimberleys Barnett Gorge		U. Aspöck & H. Aspöck 1987	Die Berothiden Australiens IV
Spermophorella mjobergi (Esben-Petersen, 1918)	AUS	Australia	Western Australia	Kimberleys, Mount Barnett, 350m	16.40°S, 125.57°E	U. Aspöck & H. Aspöck 1987	Die Berothiden Australiens IV
Spermophorella mjobergi (Esben-Petersen, 1918)	AUS	Australia	Western Australia	Kimberleys, Windjana Gorge, 50m	17.25°S, 124.59°E	U. Aspöck & H. Aspöck 1987	Die Berothiden Australiens IV
Spermophorella mjobergi (Esben-Petersen, 1918)	AUS	Australia	Western Australia	Kimberleys, King Leopold Range, 200m	17.15°S, 125.15°E	U. Aspöck & H. Aspöck 1987	Die Berothiden Australiens IV
Spermophorella mjobergi (Esben-Petersen, 1918)	AUS	Australia	Western Australia	40km W Kununurra, 100m	15.48°S, 128.15°E	U. Aspöck & H. Aspöck 1987	Die Berothiden Australiens IV
Spermophorella mjobergi (Esben-Petersen, 1918)	AUS	Australia	Western Australia	N Halls Creek, S Turkey Creek	17.05°S, 128.12°E	U. Aspöck & H. Aspöck 1987	Die Berothiden Australiens IV
Spermophorella mjobergi (Esben-Petersen, 1918)	AUS	Australia	Northern Territory	17.7km S-SW of Mt. Sandford		U. Aspöck & H. Aspöck 1987	Die Berothiden Australiens IV
Spermophorella mjobergi (Esben-Petersen, 1918)	AUS	Australia	Western Australia	Wyndham		U. Aspöck & H. Aspöck 1987	Die Berothiden Australiens IV
Spermophorella mjobergi (Esben-Petersen, 1918)	AUS	Australia	NW-Australien			Krüger 1922	Berothidae. Beiträge zu einer Monographie
Spermophorella mjobergi (Esben-Petersen, 1918)	AUS	Australia	North Western Australia	Distrito de Kimberley	18°00'S, 126°35'E	Navás 1929	Monografía de la Familia de los Berótidos
Spermophorella mjobergi (Esben-Petersen, 1918)	AUS	Australia	Western Australia	Kimberley district	18°00'S, 126°35'E	U. Aspöck & H. Aspöck 1987	Die Berothiden Australiens IV
Spiroberotha fernandezi Adams, 1989	SAM	Venezuela	Sucre	Carupano		Adams 1989	A new genus of Berothidae from Tropical America
Spiroberotha fernandezi Adams, 1989	SAM	Venezuela		Aragua, El Limon, 450m		Adams 1989	A new genus of Berothidae from Tropical America
Spiroberotha fernandezi Adams, 1989	SAM	Venezuela		Guarico Fundo Masaguaral, Cano Caracol		Adams 1989	A new genus of Berothidae from Tropical America
Spiroberotha sanctarosae Adams, 1989	SAM	Costa Rica	Guanacaste Prov.	Santa Rosa National Park		Adams 1989	A new genus of Berothidae from Tropical America
Spiroberotha sanctarosae Adams, 1989	SAM	Costa Rica		10mi S of Canas, Finca la Taboga		Adams 1989	A new genus of Berothidae from Tropical America
Spiroberotha sanctarosae Adams, 1989	SAM	Venezuela	Cojedes	Hato Mataclara, 1320		Adams 1989	A new genus of Berothidae from Tropical America
Spiroberotha sanctarosae Adams, 1989	SAM	Venezuela		Rio Caribe		Adams 1989	A new genus of Berothidae from Tropical America
Spiroberotha sanctarosae Adams, 1989	SAM	Venezuela		Guarico, 44km S Calabozo, 60m, Hato Masaguaral	8°34'N, 67°35'W	Adams 1989	A new genus of Berothidae from Tropical America
Spiroberotha sanctarosae Adams, 1990	SAM	Costa Rica	Guanacaste	P.N. Guanacaste, Agua Buena, 200m		Monserrat 2006	Nuevos datos sobre algunas especies...
Spiroberotha sanctarosae Adams, 1990	SAM	Costa Rica		Estación Murciélago, 8km SW Cuajiniquil, 100m		Monserrat 2006	Nuevos datos sobre algunas especies...
Spiroberotha sanctarosae Adams, 1990	SAM	Costa Rica		N.P. Santa Rosa, 300m		Monserrat 2006	Nuevos datos sobre algunas especies...
Spiroberotha sanctarosae Adams, 1990	SAM	Costa Rica		Puntarenas, Quepos, P.N. Manuel Antonio, 80m		Monserrat 2006	Nuevos datos sobre algunas especies...
Spiroberotha sanctarosae Adams, 1990	SAM	Colombia	Magdalena	Tayrona, Neguanje	11°20'N, 74°02'W	Ardila-Camacho 2013	First record of Beaded Lacewings from Colombia
Spiroberotha sanctarosae Adams, 1990	SAM	Colombia	Bolivar	Zambrano	9°43'N, 74°46'W	Ardila-Camacho 2013	First record of Beaded Lacewings from Colombia
Stenobiella arrunja U. Aspöck & H. Aspöck, 1984	AUS	Australia	Northern Territory	Devil's Marbles, 320m	20.34°S, 134.16°E	U. Aspöck & H. Aspöck 1984	Die Berothiden Australiens I
Stenobiella butleri (Smithers, 1984)	AUS	Australia	Western Australia	Barrow Island		Smithers 1984	The Neuroptera of Barrow and nearby islands
Stenobiella cardaleae U. Aspöck & H. Aspöck, 1984	AUS	Australia	Queensland	15km S by W of Charleville	26.32°S, 146.12°E	U. Aspöck & H. Aspöck 1984	Die Berothiden Australiens I
Stenobiella gallardi Tillyard, 1916	AUS	Australia	New South Wales	Kenthurst		Navás 1929	Monografía de la Familia de los Berótidos
Stenobiella gallardi Tillyard, 1916	AUS	Australia	New South Wales	Kenthurst		Tillyard 1916	Studies in Australian Neuroptera No. IV
Stenobiella hirsutissima Tillyard, 1916	AUS	Australia		Cerca de Brisbane, en Sherwood		Navás 1929	Monografía de la Familia de los Berótidos
Stenobiella hirsutissima Tillyard, 1916	AUS	Australia		Sherwood, near Brisbane		Tillyard 1916	Studies in Australian Neuroptera No. IV
Stenobiella kaikai U. Aspöck & H. Aspöck, 1984	AUS	Australia	Western Australia	Murchison R.	27.49°S, 114.41°E	U. Aspöck & H. Aspöck 1984	Die Berothiden Australiens I
Stenobiella moma U. Aspöck & H. Aspöck, 1984	AUS	Australia	Queensland	10km N Emerald		U. Aspöck & H. Aspöck 1984	Die Berothiden Australiens I
Stenobiella muellerorum U. Aspöck & H. Aspöck, 1984	AUS	Australia	Northern Territory	Barry Caves Road H., 200m	19.59°S, 136.37°E	U. Aspöck & H. Aspöck 1984	Die Berothiden Australiens I
Stenobiella muellerorum U. Aspöck & H. Aspöck, 1984	AUS	Australia	Northern Territory	Devil's Marbles, 320m	20.34°S, 134.16°E	U. Aspöck & H. Aspöck 1984	Die Berothiden Australiens I
Stenobiella pindana U. Aspöck & H. Aspöck, 1984	AUS	Australia	Victoria	Little Desert, 13miles S of Kiata		U. Aspöck & H. Aspöck 1984	Die Berothiden Australiens I
Stenobiella pulla Kimmins, 1930	AUS	Australia	Northern Territory	Port Darwin	12°27'S, 131°00'E	Kimmins 1930	A new Australian Berothid
Stenobiella sp.	AUS	Australia		Fraser Island	25°09'S, 153°07'E	Lambkin 1987	The Neuroptera and Megaloptera (Insecta) of Fraser Island
Stenobiella theischingerorum U. Aspöck & H. Aspöck, 1984	AUS	Australia	Northern Territory	Barry Caves Road H., 200m	19.59°S, 136.37°E	U. Aspöck & H. Aspöck 1984	Die Berothiden Australiens I
Stenobiella theischingerorum U. Aspöck & H. Aspöck, 1984	AUS	Australia	Northern Territory	Devil's Marbles, 320m	20.34°S, 134.16°E	U. Aspöck & H. Aspöck 1984	Die Berothiden Australiens I
Stenobiella theischingerorum U. Aspöck & H. Aspöck, 1984	AUS	Australia	Northern Territory	160km E Three Ways		U. Aspöck & H. Aspöck 1984	Die Berothiden Australiens I
Stenobiella variola Winterton, 2010	AUS	Australia	New South Wales	Tintinallogy Station	31°59'N, 143°01'E	Winterton 2010	A new species of Stenobiella from Australia
Tanzanberotha hirsuta U. Aspöck & Hynd, 1995	AFR	Tanzania		Matumbi Highlands, 750ft	8°19'00''S, 38°57'56''E	U. Aspöck & Hynd 1995	A new genus and species of Nosybinae
Tanzanberotha hirsuta U. Aspöck & Hynd, 1995	AFR	Kenya		Brit. O. Afrika	00°10'N, 37°55'E	U. Aspöck & Hynd 1995	A new genus and species of Nosybinae
Trichoberotha ferruginea Handschin, 1935	AUS	Australia	Northern Territory	Brock Creek Burnside, N. Aust.		U. Aspöck & H. Aspöck 1984	Die Berothiden Australiens (und Neuseelands) II
Trichoberotha ferruginea Handschin, 1935	AUS	Australia	Northern Territory	Broch's Crk		U. Aspöck & H. Aspöck 1984	Die Berothiden Australiens (und Neuseelands) II
Trichoberotha ferruginea Handschin, 1935	AUS	Australia	Northern Territory	Burnside, N. Aust.		U. Aspöck & H. Aspöck 1984	Die Berothiden Australiens (und Neuseelands) II
Trichoberotha ferruginea Handschin, 1935	AUS	Australia	Northern Territory	Burnside N. A.		U. Aspöck & H. Aspöck 1984	Die Berothiden Australiens (und Neuseelands) II
Trichoberotha ferruginea Handschin, 1935	AUS	Australia	Northern Territory	Pine Ck		U. Aspöck & H. Aspöck 1984	Die Berothiden Australiens (und Neuseelands) II
Trichoberotha ferruginea Handschin, 1935	AUS	Australia	Northern Territory	Katherine Gorge		U. Aspöck & H. Aspöck 1984	Die Berothiden Australiens (und Neuseelands) II
Trichoberotha ferruginea Handschin, 1935	AUS	Australia	Northern Territory	Marrakai Station		U. Aspöck & H. Aspöck 1984	Die Berothiden Australiens (und Neuseelands) II
Trichoberotha ferruginea Handschin, 1935	AUS	Australia	Northern Territory	34 mi NW of Dorisvale HS	14.13°S, 130.55°E	U. Aspöck & H. Aspöck 1984	Die Berothiden Australiens (und Neuseelands) II
Trichoberotha ferruginea Handschin, 1935	AUS	Australia	Northern Territory	Campbell Spring 25mi SW by W of Limbunya HS	17.25°S, 129.34°E	U. Aspöck & H. Aspöck 1984	Die Berothiden Australiens (und Neuseelands) II
Trichoberotha ferruginea Handschin, 1935	AUS	Australia	Northern Territory	Mt. Brockman 14 km S by E of Mudginbarry HS	12.43°S, 132.54°E	U. Aspöck & H. Aspöck 1984	Die Berothiden Australiens (und Neuseelands) II
Trichoberotha ferruginea Handschin, 1935	AUS	Australia	Northern Territory	Kakadu Nat.P. near Jim Jim Falls , 80m	13.17°S, 132.50°E	U. Aspöck & H. Aspöck 1984	Die Berothiden Australiens (und Neuseelands) II
Trichoberotha ferruginea Handschin, 1935	AUS	Australia	Northern Territory	Newcastle Waters, N. Australia		U. Aspöck & H. Aspöck 1984	Die Berothiden Australiens (und Neuseelands) II
Trichoberotha ferruginea Handschin, 1935	AUS	Australia	Northern Territory	Bradshaw	15.21°S, 130.17°E	U. Aspöck & H. Aspöck 1984	Die Berothiden Australiens (und Neuseelands) II
Trichoberotha ferruginea Handschin, 1935	AUS	Australia	Northern Territory	N Dunmarra, 200m	16.35°S, 133.24°E	U. Aspöck & H. Aspöck 1984	Die Berothiden Australiens (und Neuseelands) II
Trichoberotha ferruginea Handschin, 1935	AUS	Australia	Northern Territory	W Timber Creek, 50m	15.53°S, 130.31°E	U. Aspöck & H. Aspöck 1984	Die Berothiden Australiens (und Neuseelands) II
Trichoberotha ferruginea Handschin, 1935	AUS	Australia	Northern Territory	7mi N Larrimah		U. Aspöck & H. Aspöck 1984	Die Berothiden Australiens (und Neuseelands) II
Trichoberotha ferruginea Handschin, 1935	AUS	Australia	Northern Territory	Elsey Ck., 19km SSE of Mataranka	15.05°S, 133.07E	U. Aspöck & H. Aspöck 1984	Die Berothiden Australiens (und Neuseelands) II
Trichoberotha ferruginea Handschin, 1935	AUS	Australia	Northern Territory	Victoria Ricer Downs		U. Aspöck & H. Aspöck 1984	Die Berothiden Australiens (und Neuseelands) II
Trichoberotha ferruginea Handschin, 1935	AUS	Australia	Northern Territory	12.8km E-NE of Victoria Riv. Downs		U. Aspöck & H. Aspöck 1984	Die Berothiden Australiens (und Neuseelands) II
Trichoberotha ferruginea Handschin, 1935	AUS	Australia	Northern Territory	2mi ENE of Vict. R. Downs	16.24°S, 131.02°E	U. Aspöck & H. Aspöck 1984	Die Berothiden Australiens (und Neuseelands) II
Trichoberotha ferruginea Handschin, 1935	AUS	Australia	Northern Territory	6.4km S-SW of Victoria River Downs		U. Aspöck & H. Aspöck 1984	Die Berothiden Australiens (und Neuseelands) II
Trichoberotha ferruginea Handschin, 1935	AUS	Australia	Western Australia	40km W Kununurra, 100m	15.48°S, 128.15°E	U. Aspöck & H. Aspöck 1984	Die Berothiden Australiens (und Neuseelands) II
Trichoberotha ferruginea Handschin, 1935	AUS	Australia	Western Australia	Kimberleys, King Leopold Range, 200m	17.15°S, 125.15°E	U. Aspöck & H. Aspöck 1984	Die Berothiden Australiens (und Neuseelands) II
Trichoberotha ferruginea Handschin, 1935	AUS	Australia	Northern Territory	Burnside Station		Handschin 1935	Indo-Australische Neuropteren und Mecopteren
Trichoberotha striatovenosa U. Aspöck & H. Aspöck, 1985	AUS	Australia	Western Australia	163km SE by E Broome	18.49°S, 123.17°E	U. Aspöck & H. Aspöck 1985	Die Berothiden Australiens (und Neuseelands) II
Trichoberotha striatovenosa U. Aspöck & H. Aspöck, 1985	AUS	Australia	Western Australia	Drysdale River	18.22°S, 122.53°E	U. Aspöck & H. Aspöck 1985	Die Berothiden Australiens (und Neuseelands) II
Trichoberotha striatovenosa U. Aspöck & H. Aspöck, 1985	AUS	Australia	Western Australia	Morgan Falls	15.02°S, 126.40°E	U. Aspöck & H. Aspöck 1985	Die Berothiden Australiens (und Neuseelands) II
Trichoberotha striatovenosa U. Aspöck & H. Aspöck, 1985	AUS	Australia	Western Australia	Carson & Scarpment	14.49°S, 126.49°E	U. Aspöck & H. Aspöck 1985	Die Berothiden Australiens (und Neuseelands) II
Trichoma gracilipenne Tillyard, 1916	AUS	Australia	New South Wales	Broken Hill		U. Aspöck & H. Aspöck 1984	Die Berothiden Australiens (und Neuseelands) II
Trichoma gracilipenne Tillyard, 1916	AUS	Australia	Queensland	Emerald		U. Aspöck & H. Aspöck 1984	Die Berothiden Australiens (und Neuseelands) II
Trichoma gracilipenne Tillyard, 1916	AUS	Australia	Queensland	Charleville		U. Aspöck & H. Aspöck 1984	Die Berothiden Australiens (und Neuseelands) II
Trichoma gracilipenne Tillyard, 1916	AUS	Australia	Queensland	16mi NE of Bransby H.S.		U. Aspöck & H. Aspöck 1984	Die Berothiden Australiens (und Neuseelands) II
Trichoma gracilipenne Tillyard, 1916	AUS	Australia	Queensland	Isla Gorge, approx. 40km SE of Theodore		U. Aspöck & H. Aspöck 1984	Die Berothiden Australiens (und Neuseelands) II
Trichoma gracilipenne Tillyard, 1916	AUS	Australia	Queensland	Cunnamulla		U. Aspöck & H. Aspöck 1984	Die Berothiden Australiens (und Neuseelands) II
Trichoma gracilipenne Tillyard, 1916	AUS	Australia	Queensland	Morven		U. Aspöck & H. Aspöck 1984	Die Berothiden Australiens (und Neuseelands) II
Trichoma gracilipenne Tillyard, 1916	AUS	Australia	Queensland	Bollon Dist.		U. Aspöck & H. Aspöck 1984	Die Berothiden Australiens (und Neuseelands) II
Trichoma gracilipenne Tillyard, 1916	AUS	Australia	Queensland	1mi NE of Nocundra		U. Aspöck & H. Aspöck 1984	Die Berothiden Australiens (und Neuseelands) II
Trichoma gracilipenne Tillyard, 1916	AUS	Australia	New South Wales	Goono State Forest 5mi S Mendooran		U. Aspöck & H. Aspöck 1984	Die Berothiden Australiens (und Neuseelands) II
Trichoma gracilipenne Tillyard, 1916	AUS	Australia	New South Wales	Hay		U. Aspöck & H. Aspöck 1984	Die Berothiden Australiens (und Neuseelands) II
Trichoma gracilipenne Tillyard, 1916	AUS	Australia	New South Wales	40 W Bourke		U. Aspöck & H. Aspöck 1984	Die Berothiden Australiens (und Neuseelands) II
Trichoma gracilipenne Tillyard, 1916	AUS	Australia	New South Wales	70 W Cobar		U. Aspöck & H. Aspöck 1984	Die Berothiden Australiens (und Neuseelands) II
Trichoma gracilipenne Tillyard, 1916	AUS	Australia	New South Wales	The Rock near Wagga Wagga		U. Aspöck & H. Aspöck 1984	Die Berothiden Australiens (und Neuseelands) II
Trichoma gracilipenne Tillyard, 1916	AUS	Australia	Victoria	Walpeup		U. Aspöck & H. Aspöck 1984	Die Berothiden Australiens (und Neuseelands) II
Trichoma gracilipenne Tillyard, 1916	AUS	Australia	Victoria	6mls NW Wedderburn		U. Aspöck & H. Aspöck 1984	Die Berothiden Australiens (und Neuseelands) II
Trichoma gracilipenne Tillyard, 1916	AUS	Australia	Victoria	1ml S Ouyen		U. Aspöck & H. Aspöck 1984	Die Berothiden Australiens (und Neuseelands) II
Trichoma gracilipenne Tillyard, 1916	AUS	Australia	South Australia	Nooltana Ck 13km NW by N Hawker	31.47°S, 138.21°E	U. Aspöck & H. Aspöck 1984	Die Berothiden Australiens (und Neuseelands) II
Trichoma gracilipenne Tillyard, 1916	AUS	Australia	South Australia	Leigh Ck.		U. Aspöck & H. Aspöck 1984	Die Berothiden Australiens (und Neuseelands) II
Trichoma gracilipenne Tillyard, 1916	AUS	Australia	South Australia	Tarcoonyinna Creek at Stuart H'way		U. Aspöck & H. Aspöck 1984	Die Berothiden Australiens (und Neuseelands) II
Trichoma gracilipenne Tillyard, 1916	AUS	Australia	Western Australia	25 S Coolgardie		U. Aspöck & H. Aspöck 1984	Die Berothiden Australiens (und Neuseelands) II
Trichoma gracilipenne Tillyard, 1916	AUS	Australia	Western Australia	Wongan Hills		U. Aspöck & H. Aspöck 1984	Die Berothiden Australiens (und Neuseelands) II
Trichoma gracilipenne Tillyard, 1916	AUS	Australia	Western Australia	55km E of Balladonia motel, Nullarbor Plain		U. Aspöck & H. Aspöck 1984	Die Berothiden Australiens (und Neuseelands) II
Trichoma gracilipenne Tillyard, 1916	AUS	Australia	Western Australia	23mi W of Fraser Rge HS	32.04°S, 122.24°E	U. Aspöck & H. Aspöck 1984	Die Berothiden Australiens (und Neuseelands) II
Trichoma gracilipenne Tillyard, 1916	AUS	Australia	New South Wales	Broken Hill		Navás 1929	Monografía de la Familia de los Berótidos
Trichoma gracilipenne Tillyard, 1916	AUS	Australia	New South Wales	Broken Hill		Tillyard 1916	Studies in Australian Neuroptera No. IV
